# Supplementary material for: Discovery, Biosynthesis and Biological Activity of a Succinylated Myxochelin from the Myxobacterial strain MSr12020
Source: Preprints.org preprint supplement (doi:10.20944/preprints202209.0147.v1), 2022-09-12
Supplement: Supplementary file 1 [file supplementary]

## Supplementary Information

# Discovery, Biosynthesis and Biological Activity of a Succinylated Myxochelin from the Myxobacterial strain MSr12020

Dorothy A. Okoth <sup>1,2,3,4,5+</sup>, Joachim J. Hug <sup>1,2,3,4+</sup>, Ronald Garcia <sup>1,2,3,4</sup> and Rolf Müller <sup>1,2,3,4\*</sup>

<sup>1</sup> Helmholtz-Institute for Pharmaceutical Research Saarland (HIPS), Helmholtz Centre for Infection Research (HZI), Department of Microbial Natural Products, Saarland University, Campus E8 1, 66123 Saarbrücken, Germany

<sup>2</sup> Department of Pharmacy, Saarland University, 66123 Saarbrücken, Germany

<sup>3</sup> German Center for Infection Research (DZIF), Partner Site Hannover-Braunschweig, 38124 Braunschweig, Germany

<sup>4</sup> Helmholtz International Labs, Department of Microbial Natural Products, Saarland University, Campus E8 1, 66123 Saarbrücken, Germany

<sup>5</sup> Maseno University, P.O box 333-40105, Maseno, Kenya

\* Correspondence and primary affiliation: rolf.mueller@helmholtz-hips.de; Tel.: +49-681-98806-3000, Helmholtz-Institute for Pharmaceutical Research Saarland (HIPS), Helmholtz Centre for Infection Research (HZI), Department of Microbial Natural Products, Saarland University, Campus E8 1, 66123 Saarbrücken, Germany

<sup>+</sup> These authors contributed equally to this work.

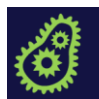

## Table of Contents

|                                                              |    |
|--------------------------------------------------------------|----|
| 1. Analytical data .....                                     | 3  |
| 1.1 Partial ESI-MS spectra and MS <sup>2</sup> spectra ..... | 3  |
| 1.2 Proposed fragmentation pattern of 1 .....                | 10 |
| 1.3 CD spectrum of myxochelin-B-succinate (1) .....          | 11 |
| 2. NMR spectroscopic data.....                               | 12 |
| 3. Biosynthetic <i>in silico</i> investigation .....         | 15 |
| 4. Metabolome database search of 1–3 .....                   | 17 |
| 5. <sup>1</sup> H and <sup>13</sup> C NMR spectra.....       | 19 |
| 6. References .....                                          | 66 |

## 1. Analytical data

### 1.1 Partial ESI-MS spectra and MS<sup>2</sup> spectra

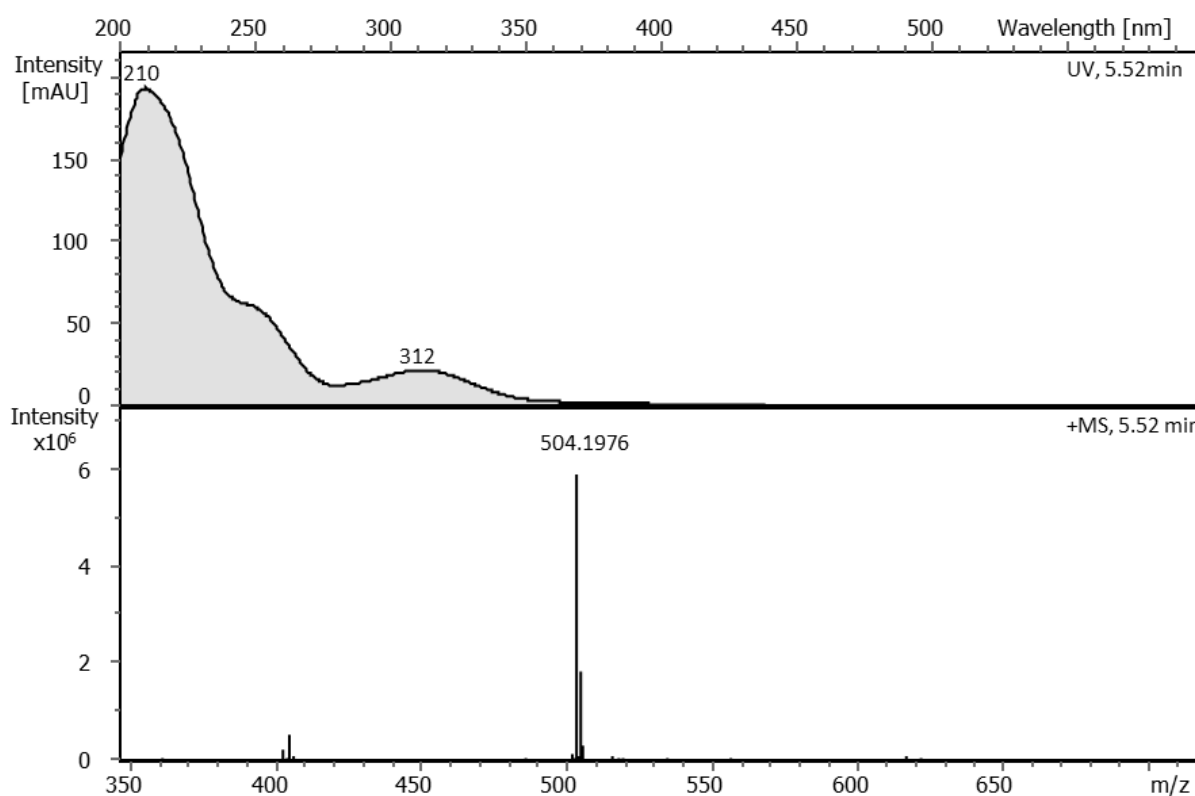

**Figure S1.** LC MS UV-VIS spectrum of myxochelin B-succinate (**1**).

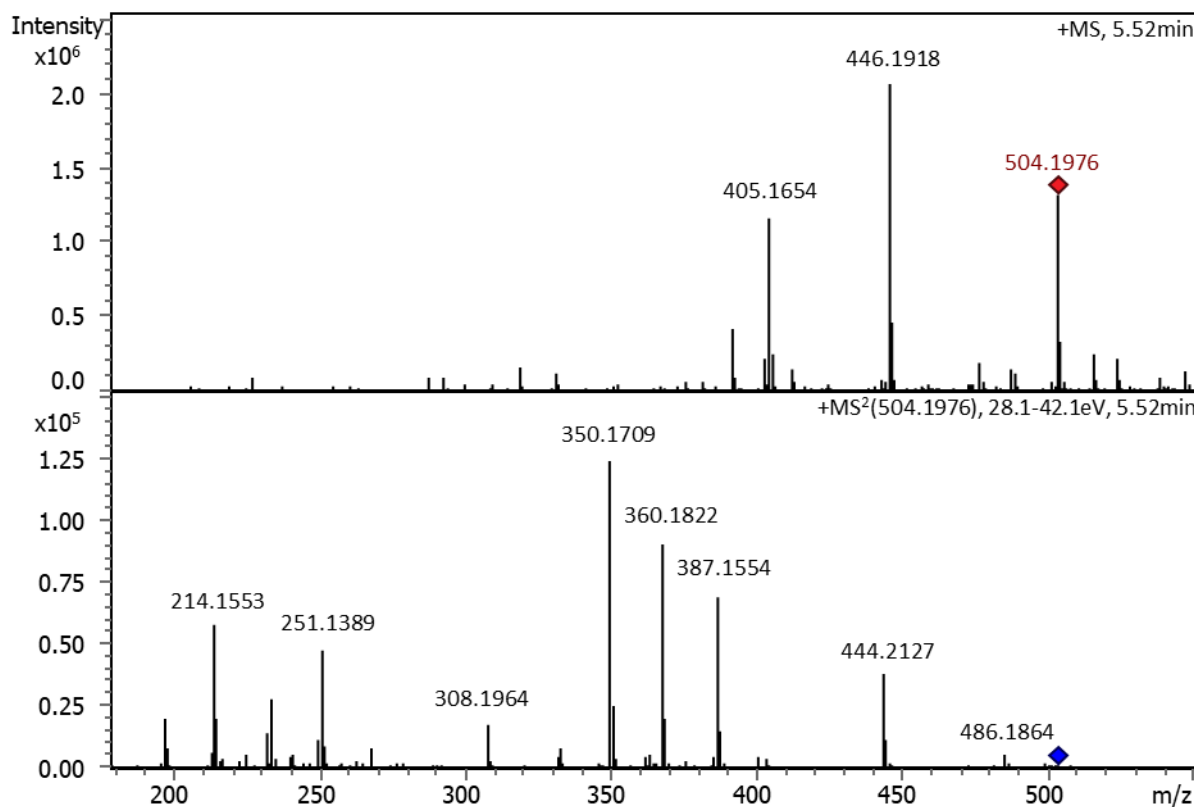

**Figure S2.** MS<sup>2</sup> fragmentation of myxochelin B-succinate (1).

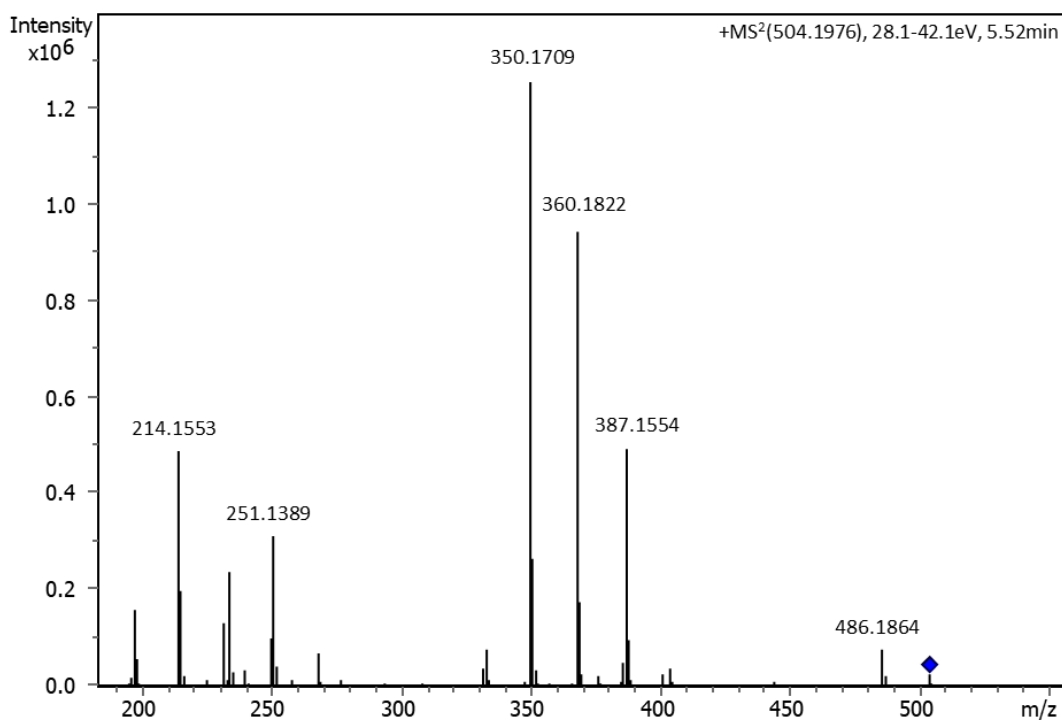

**Figure S3.** MS<sup>2</sup> fragmentation of myxochelin-B succinate (1).

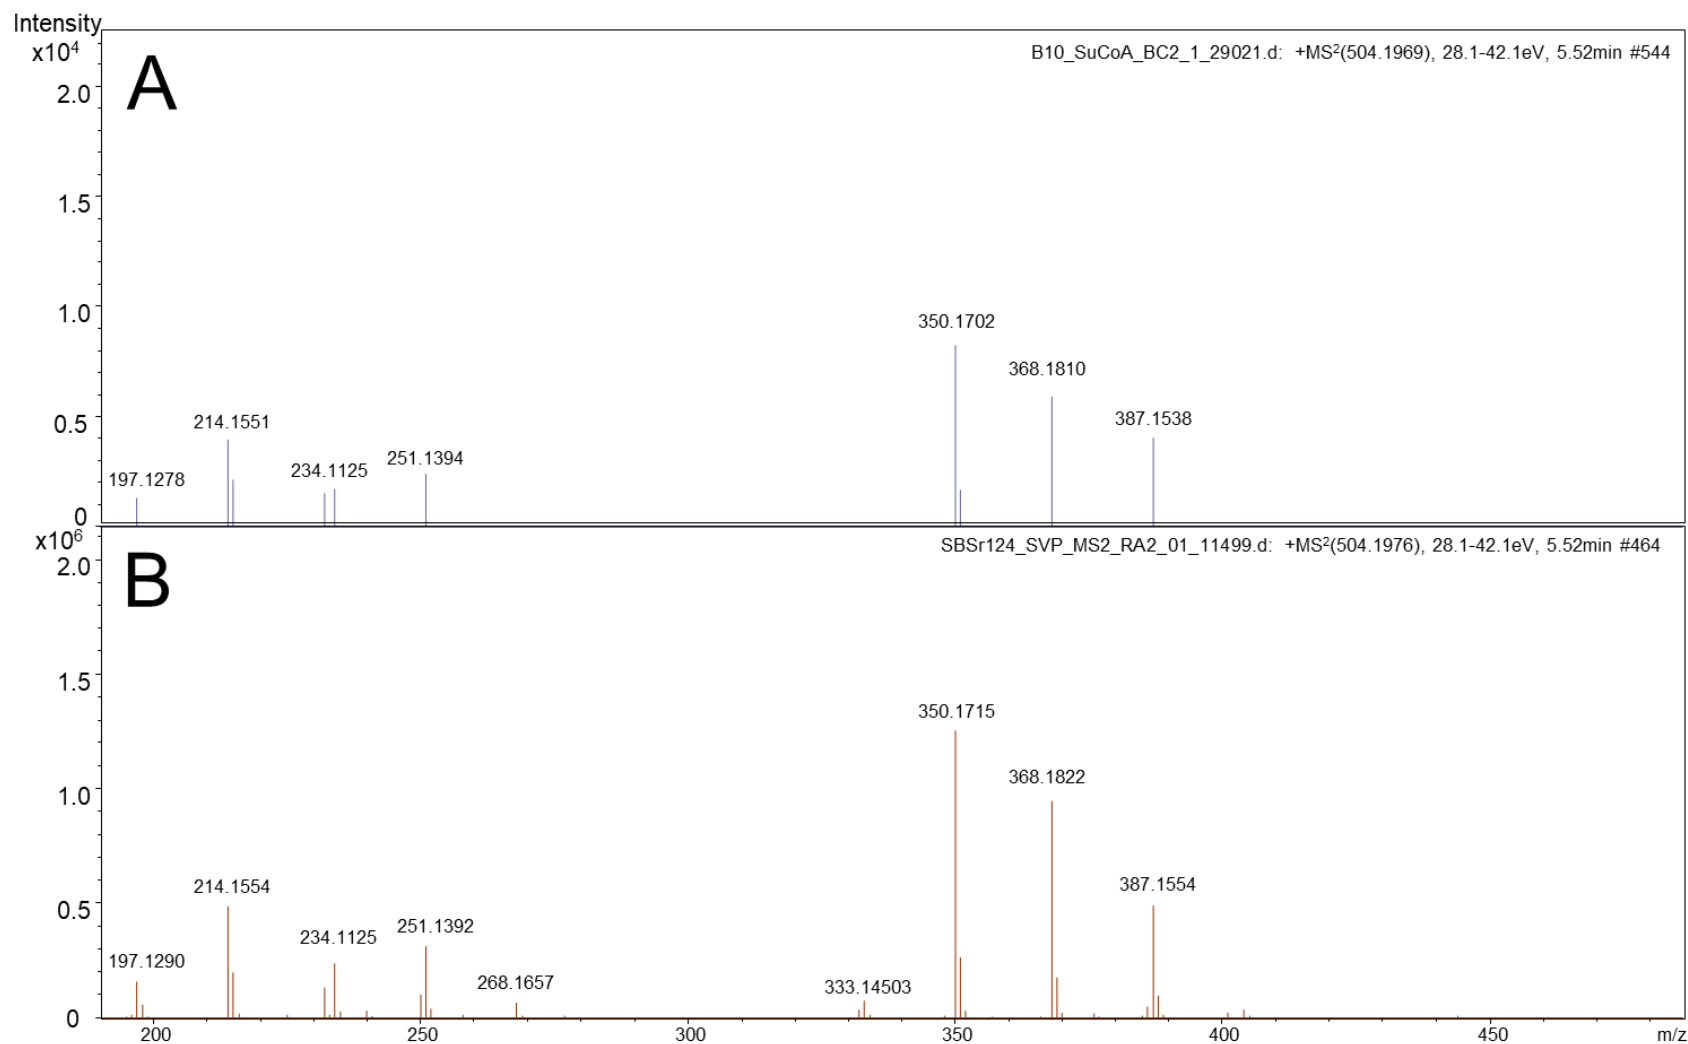

**Figure S4.** MS<sup>2</sup> spectrum of *in vitro* produced **1** (**A**) and authentic **1** (**B**). *In vitro* produced **1** ([M+H]<sup>+</sup> calcd for C<sub>24</sub>H<sub>30</sub>N<sub>3</sub>O<sub>9</sub>, 504.1977; found 504.1969; Δ 1.6 ppm) featured a slightly increased mass difference (Δ 1.6 ppm) than authentically produced **1** (Δ 0.2 ppm). Nevertheless, the identical MS<sup>2</sup> fragmentation pattern and retention time confirm that authentic and *in vitro* produced **1** are identical.

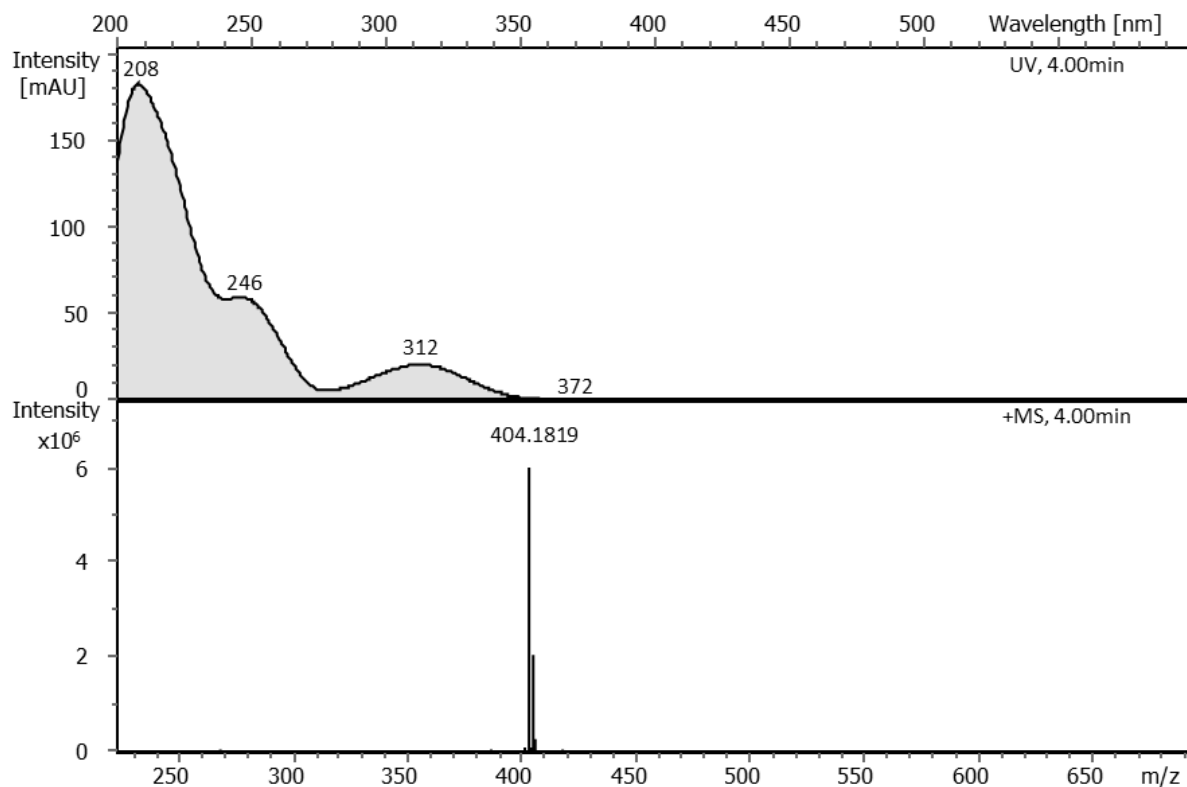

**Figure S5.** LC MS UV-VIS spectrum of myxochelin B (2).

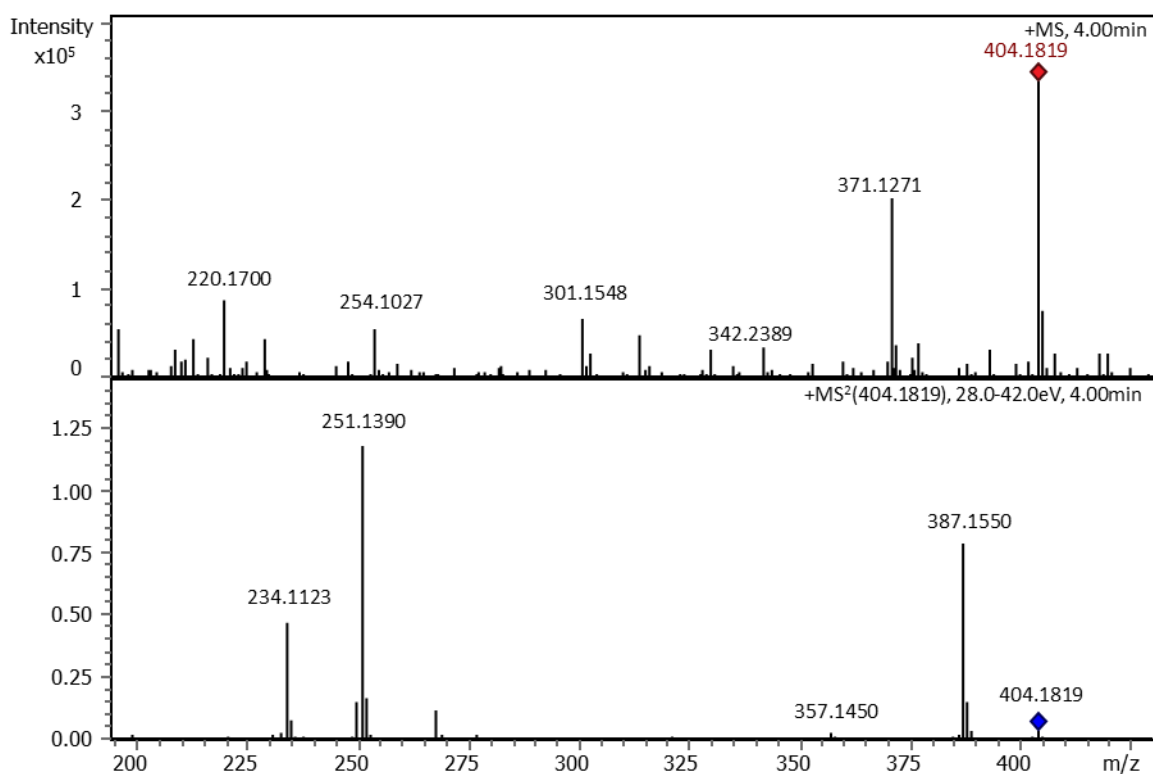

**Figure S6.** MS<sup>2</sup> fragmentation of myxochelin B (2).

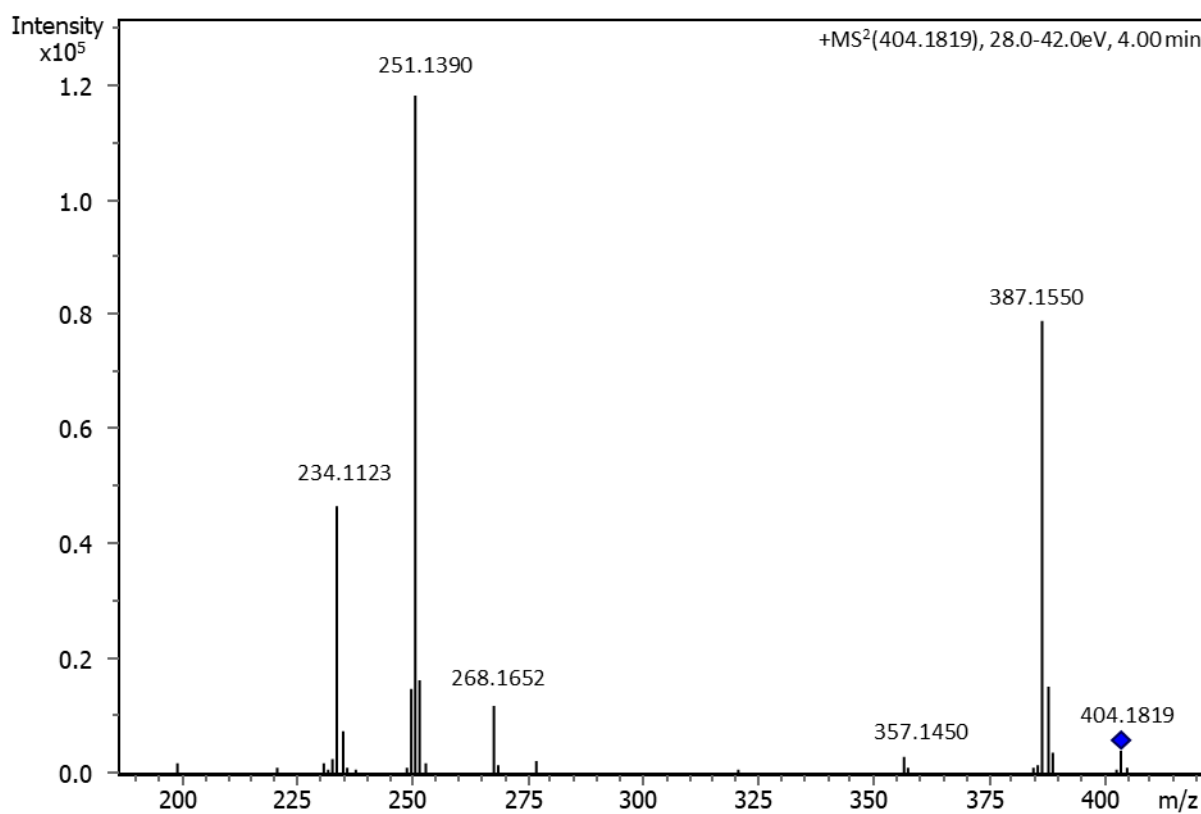

**Figure S7.** MS<sup>2</sup> spectrum of myxochelin B (**2**).

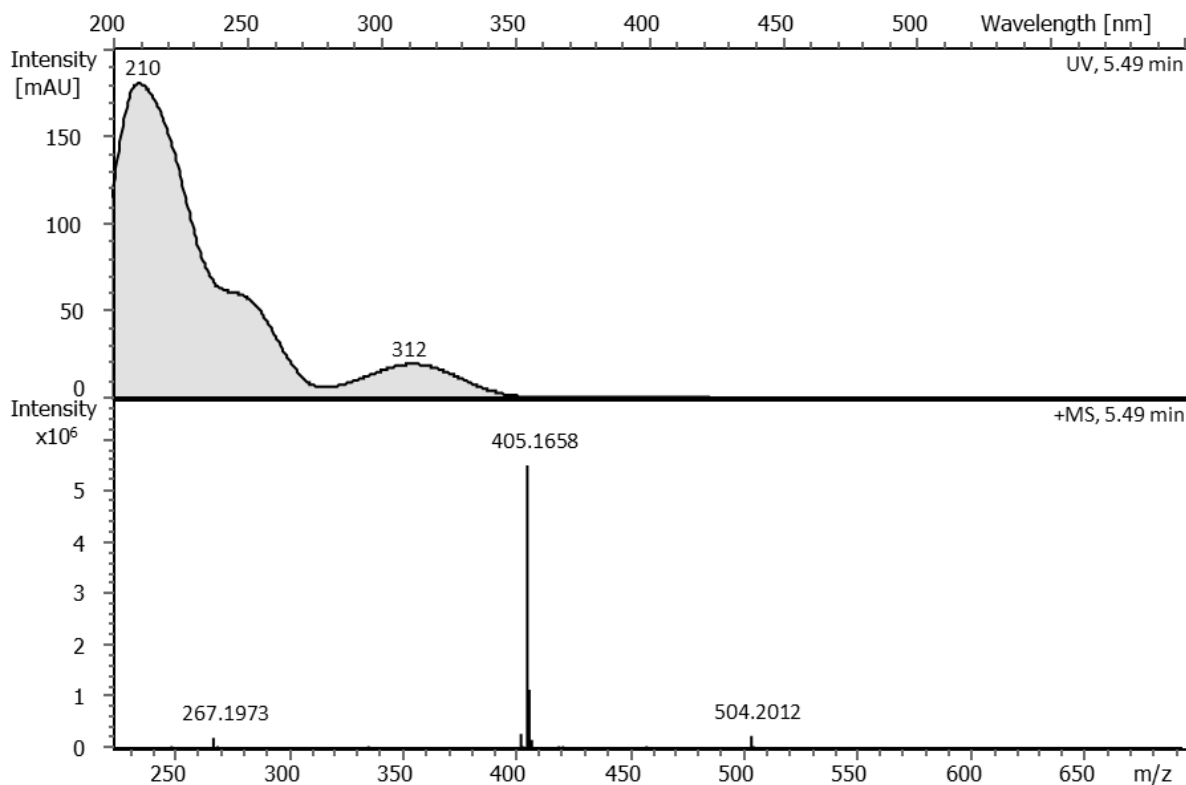

**Figure S8.** LC MS UV-VIS spectrum of myxochelin A (**3**).

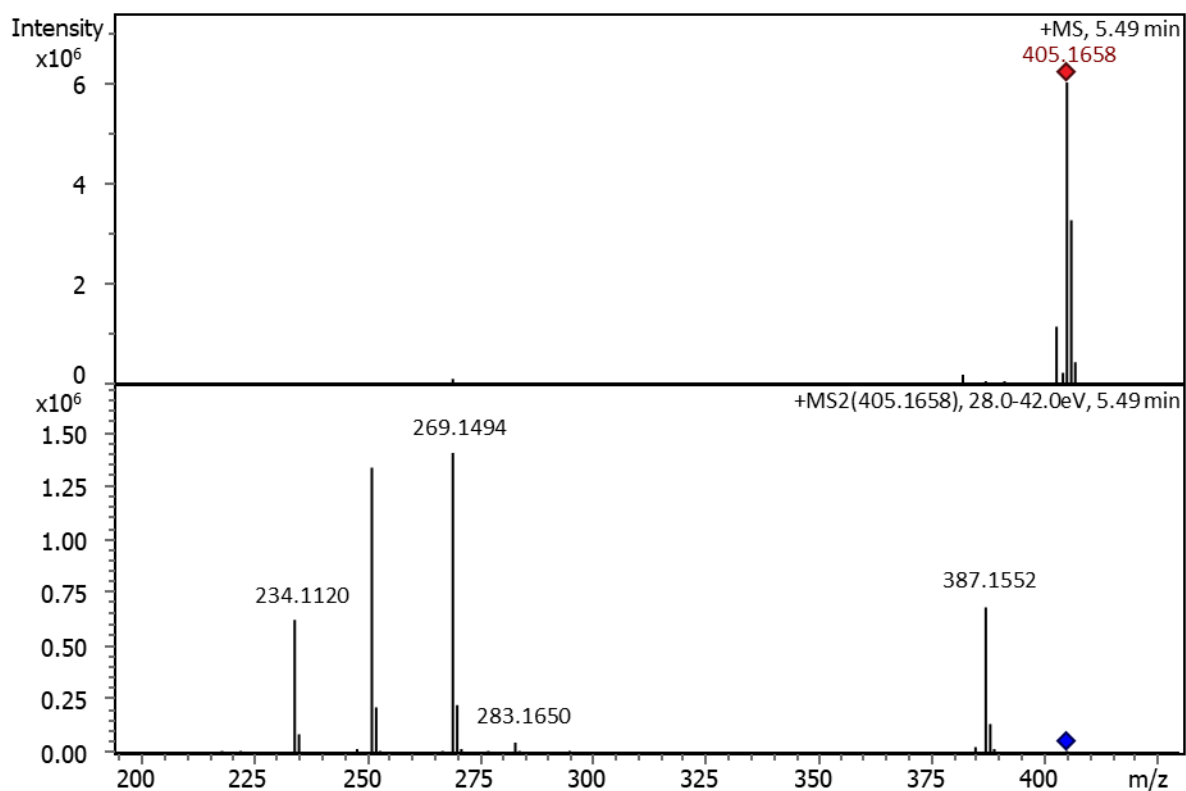

**Figure S9.** MS<sup>2</sup> fragmentation of myxochelin A (**3**).

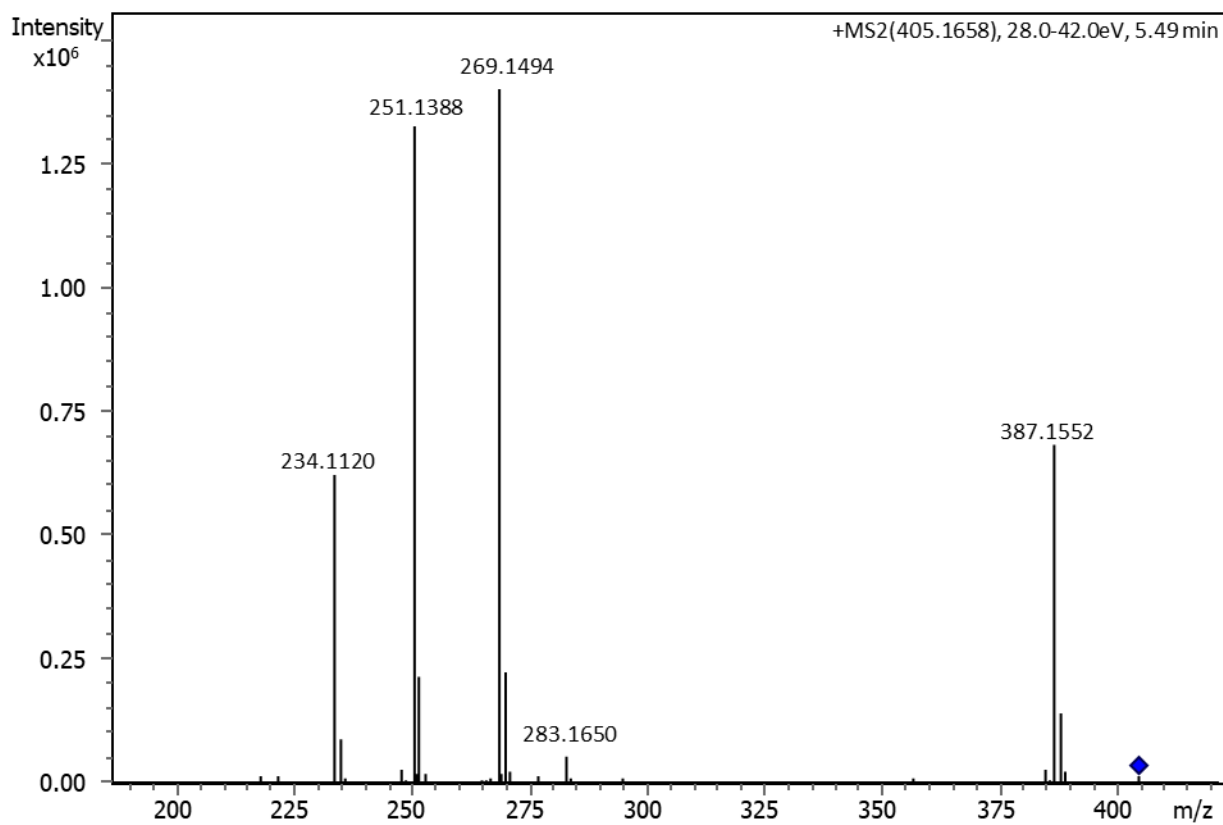

**Figure S10.** MS<sup>2</sup> fragmentation of myxochelin A (**3**).

## 1.2 Proposed fragmentation pattern of 1

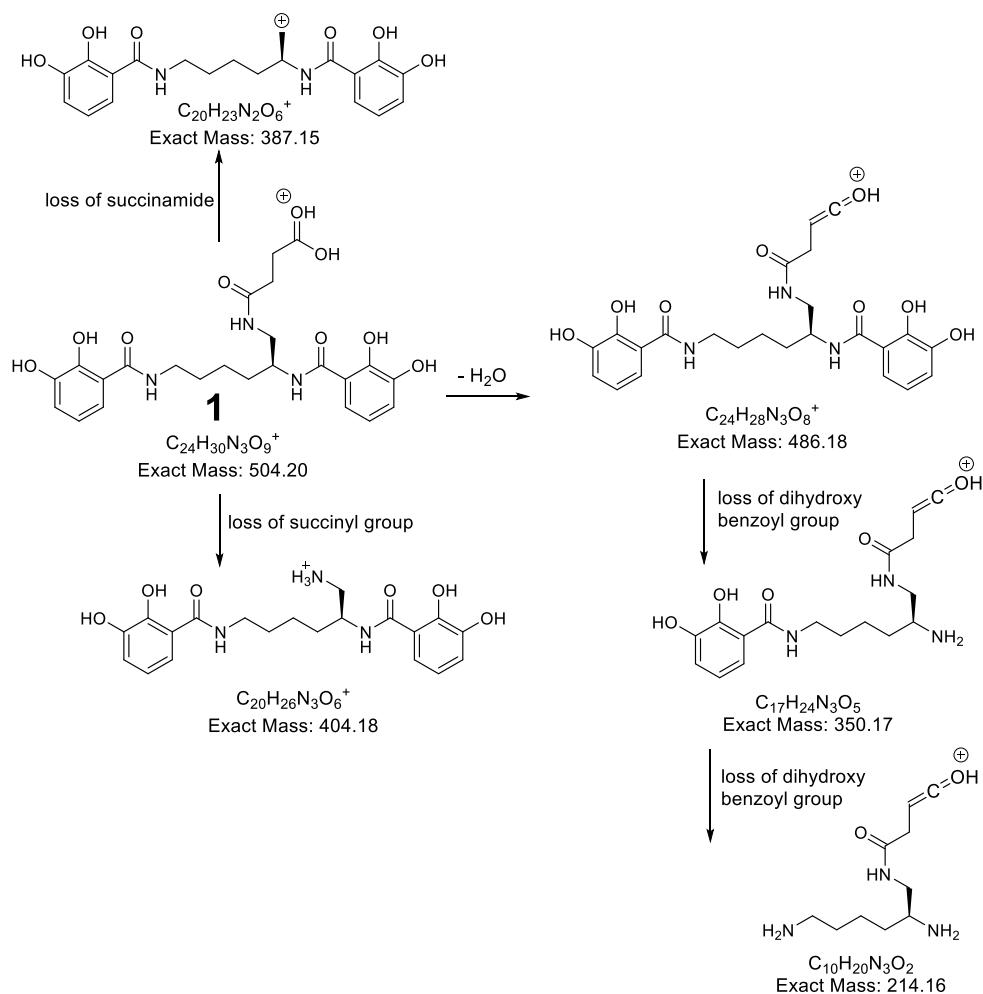

**Figure S11.** MS<sup>2</sup> fragmentation scheme of **1** and proposed structure of identified key ion.

### 1.3 CD spectrum of myxochelin-B-succinate (1)

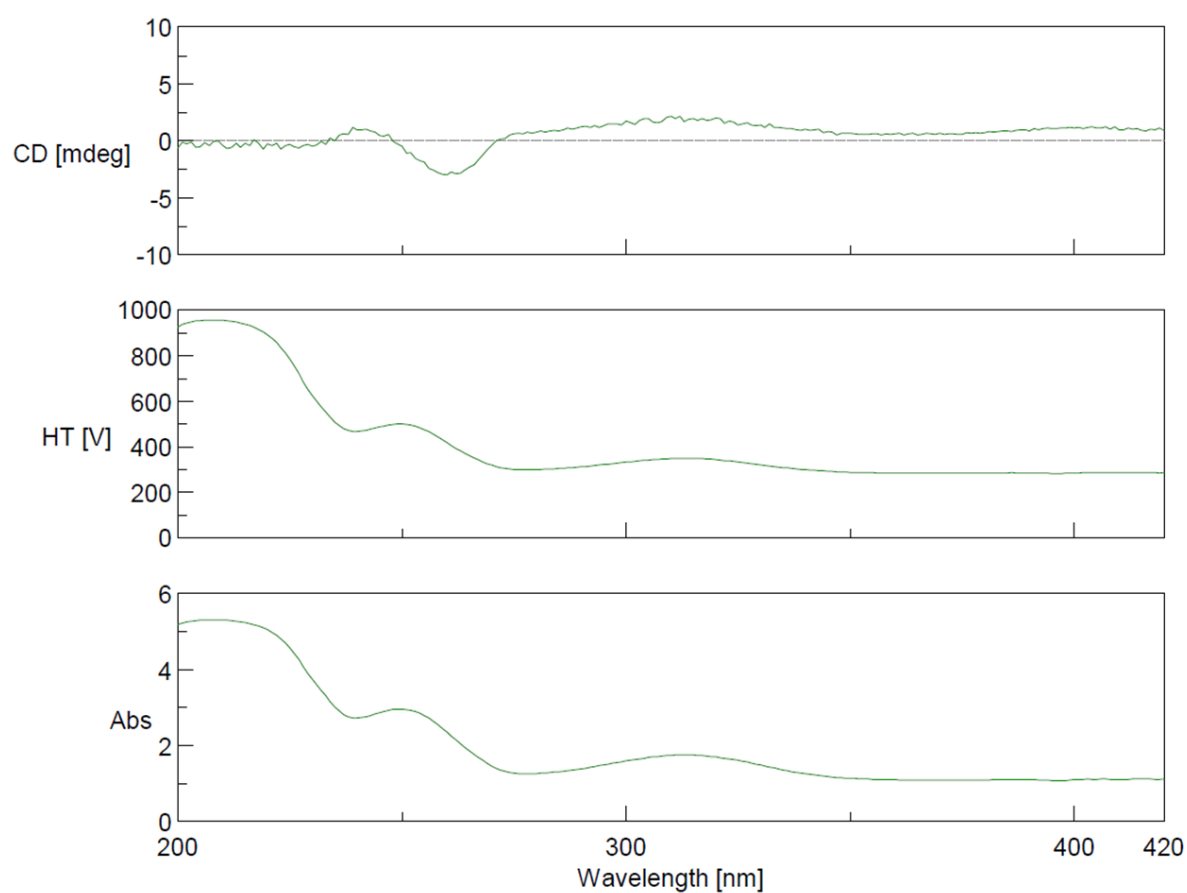

**Figure S12:** CD spectrum of **1** at a concentration of 0.5 mg/mL in MeOH in the area 190–400 nm.

## 2. NMR spectroscopic data

**Table S1.** Spectroscopic values of myxochelin B-succinate (**1**) acquired in CD<sub>3</sub>OD at 500 MHz.

| Myxochelin B-succinate ( <b>1</b> ) |            |                                                      |                                     |                                          |
|-------------------------------------|------------|------------------------------------------------------|-------------------------------------|------------------------------------------|
| Position                            | $\delta_C$ | $\delta_H$ , [m, <i>J</i> (Hz)]                      | <sup>1</sup> H- <sup>1</sup> H COSY | <sup>1</sup> H- <sup>13</sup> C HMBC     |
| 1                                   | 44.1       | 3.44 1H, dd (4.85, 13.8)<br>3.29, 1H, dd (7.3, 13.8) | H-2                                 | C-1, C-2, C-3, C-1'''                    |
| 2                                   | 51.2       | 4.21, 1H, m                                          | H-1, H-3                            | C-1, C-3, C-4, 7'                        |
| 3                                   | 32.6       | 1.67, 2H, m                                          | H-2, H-4                            | C-1, C-2, C-4, C-5                       |
| 4                                   | 24.6       | 1.48, 2H, m                                          | H-3, H-5                            | C-2, C-3, C-5, C-6                       |
| 5                                   | 30.3       | 1.67, 2H, m                                          | H-4, H-6                            | C-3, C-4, C-6                            |
| 6                                   | 40.4       | 3.38, 2H, t (7.0)                                    | H-5                                 | C-4, C-5, C-7''                          |
| 1'                                  | 116.9      | -                                                    | -                                   |                                          |
| 2'                                  | 150.4      | -                                                    | -                                   |                                          |
| 3'                                  | 147.5      | -                                                    | -                                   |                                          |
| 4'                                  | 119.7      | 6.92, 1H, dd (1.45, 7.9)                             | H-5'                                | C-1', C-2', C-3'C-6'                     |
| 5'                                  | 119.7      | 6.70, 1H, dd (7.9, 8.0)                              | H-4', H-6'                          | C-1', C-2', C-3', C-6'                   |
| 6'                                  | 118.7      | 7.18, 1H, dd (1.45, 8.0)                             | H-5'                                | C-1', C-2', C-3', C-4', C-5', C-7'       |
| 7'                                  | 171.7      | -                                                    | -                                   |                                          |
| 1''                                 | 116.9      | -                                                    | -                                   |                                          |
| 2''                                 | 150.5      | -                                                    | -                                   |                                          |
| 3''                                 | 147.4      | -                                                    | -                                   |                                          |
| 4''                                 | 119.7      | 6.90, 1H, dd (1.45, 8.0)                             | H-5''                               | C-1'', C-2'', C-3'', C-6''               |
| 5''                                 | 119.7      | 6.68, 1H, dd (7.86, 8.0)                             | H-4'', H-6''                        | C-1'', C-2'', C-3'', C-6''               |
| 6''                                 | 118.9      | 7.21, 1H, dd (1.45, 7.85)                            | H-5''                               | C-1'', C-2'', C-3'', C-4'', C-5'', C-7'' |
| 7''                                 | 171.8      | -                                                    | -                                   |                                          |
| 1'''                                | 175.5      | -                                                    | -                                   |                                          |
| 2'''                                | 31.9       | 2.44, 2H, m                                          | H-3'''                              | C-1''', C-3''', C-4'''                   |
| 3'''                                | 30.7       | 2.55, 2H, t (6.85)                                   | -                                   | C-1''', C-2''', C-4'''                   |
| 4'''                                | 176.8      | -                                                    | -                                   |                                          |

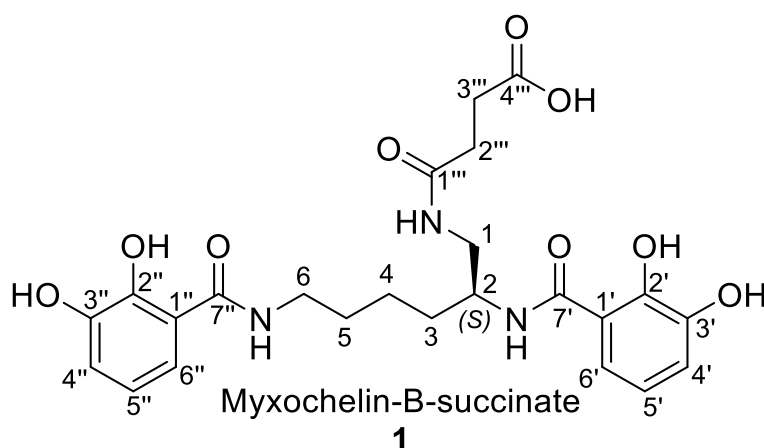

**Table S2.** Spectroscopic values of myxochelin B (**2**) acquired in CD<sub>3</sub>OD at 500 MHz.

| Myxochelin B ( <b>2</b> ) |            |                                |              |                                                            |
|---------------------------|------------|--------------------------------|--------------|------------------------------------------------------------|
| Position                  | $\delta_C$ | $\delta_H$ , [m, J (Hz)]       | # $\delta_C$ | # $\delta_H$ , [m, J (Hz)]                                 |
| 1                         | 45.1       | 3.19, 1H, brs<br>3.04, 1H, brs | 44.0         | 3.22, 1H, dd (3.9, 13.0)<br>3.07, 1H, ddd (9.8, 3.9, 13.0) |
| 2                         | 49.6       | 4.38, 1H, brs                  | 48.7         | 4.41, 2H (m)                                               |
| 3                         | 32.7       | 1.72, 2H, m                    | 31.3         | 1.70, 2H, t (m)                                            |
| 4                         | 24.4       | 1.50, 2H, m                    | 22.9         | 1.56, 2H, (m)                                              |
| 5                         | 30.1       | 1.69, 2H, m                    | 28.7         | 1.77, 2H, t (9.0)                                          |
| 6                         | 40.2       | 3.38, 2H, t (6.05)             | 38.6         | 3.43, 2H, t (6.8)                                          |
| 1'                        | 116.9      | -                              | 115.7        | -                                                          |
| 2'                        | 150.3      | -                              | 151.6        | -                                                          |
| 3'                        | 147.4      | -                              | 147.0        | -                                                          |
| 4'                        | 118.8      | 6.92, 1H, d (7.7)              | 117.8        | 6.95, 1H, dd (1.5, 7.8)                                    |
| 5'                        | 119.7      | 6.69 1H, t (7.7)               | 116.0        | 6.76, 1H, t (8.0)                                          |
| 6'                        | 118.7      | 7.16 1H, d, (7.7)              | 114.1        | 7.19, 1H, dd (1.5, 8.1)                                    |
| 7'                        | 171.7      | -                              | 169.3        | -                                                          |
| 1''                       | 116.8      | -                              | 115.7        | -                                                          |
| 2''                       | 150.4      | -                              | 153.6        | -                                                          |
| 3''                       | 147.5      | -                              | 147.6        | -                                                          |
| 4''                       | 120.8      | 6.92, 1H, d (7.7)              | 118.4        | 6.98, 1H, dd (1.5, 8.1)                                    |
| 5''                       | 119.7      | 6.69, 1H, d (7.7)              | 117.2        | 6.72, 1H, t, (8.0)                                         |
| 6''                       | 119.2      | 7.20, 1H, d (7.7)              | 115.5        | 7.33, 1H, dd (1.5, 8.1)                                    |
| 7''                       | 172.7      | -                              | 169.9        | -                                                          |

#; NMR data acquired by Ambrosi et al. [1]; <sup>13</sup>C NMR (75 MHz DMSO-d<sub>6</sub>), <sup>1</sup>H NMR (300 MHz DMSO-d<sub>6</sub>),

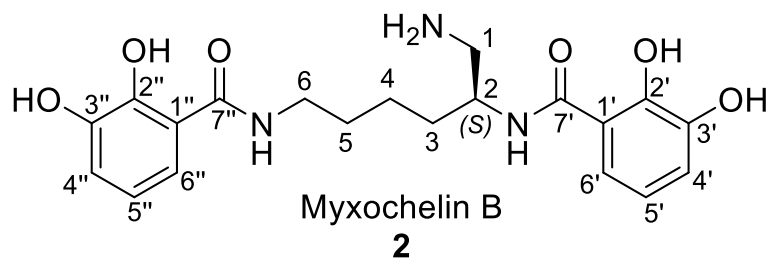

**Table S3.** Spectroscopic values of myxochelin A (**3**) acquired in CD<sub>3</sub>OD at 500 MHz.

| Myxochelin A ( <b>3</b> ) |            |                            |              |                                                      |
|---------------------------|------------|----------------------------|--------------|------------------------------------------------------|
| Position                  | $\delta_C$ | $\delta_H$ , [m, J (Hz)]   | # $\delta_C$ | # $\delta_H$ , [m, J (Hz)]                           |
| 1                         | 65.2       | 3.62, 2H, dd (2.5, 5.31)   | 63.1         | 3.47, 1H, dd (5.9, 10.8)<br>3.43, 1H, dd (5.9, 10.8) |
| 2                         | 52.8       | 4.16, 1H, m                | 51.2         | 4.00, 2H, (m)                                        |
| 3                         | 31.8       | 1.76, 1H, m<br>1.64, 1H, m | 30.1         | 1.54, 2H, m                                          |
| 4                         | 24.7       | 1.50, 2H, m                | 23.2         | 1.34, 2H, (m)                                        |
| 5                         | 30.4       | 1.70, 2H, m                | 28.8         | 1.55, 2H, (m)                                        |
| 6                         | 40.5       | 3.38, 2H, t (7.0)          | 48.6         | 3.27, 2H, (m)                                        |
| 1'                        | 116.9      | -                          | 115.3        | -                                                    |
| 2'                        | 150.4      | -                          | 149.5        | -                                                    |
| 3'                        | 147.5      | -                          | 146.1        | -                                                    |
| 4'                        | 119.7      | 6.91, 1H, t (8.0)          | 118.7        | 6.91, 1H, d (7.8)                                    |
| 5'                        | 119.7      | 6.69, 1H, q, (8.0)         | 117.8        | 6.68, 1H, t (7.8)                                    |
| 6'                        | 118.7      | 7.16, 1H, d (8.0)          | 117.5        | 7.36, 1H, d (8.0)                                    |
| 7'                        | 171.6      | -                          | 169.5        | -                                                    |
| 1''                       | 117.2      | -                          | 114.9        | -                                                    |
| 2''                       | 150.2      | -                          | 149.7        | -                                                    |
| 3''                       | 147.5      | -                          | 146.2        | -                                                    |
| 4''                       | 119.7      | 6.91, 1H, t (8.0)          | 118.7        | 6.90, 1H, d (7.8)                                    |
| 5''                       | 119.7      | 6.69, 1H, q, (8.0)         | 117.7        | 6.66, 1H, t (7.8)                                    |
| 6''                       | 119.1      | 7.28, 1H, dd (1.15, 8.0)   | 117.1        | 7.26, 1H, d (8.0)                                    |
| 7''                       | 171.5      | -                          | 169.7        | -                                                    |

#; NMR data acquired by Ambrosi et al. [1]; <sup>13</sup>C NMR (75 MHz DMSO-d<sub>6</sub>), <sup>1</sup>H NMR (300 MHz DMSO-d<sub>6</sub>),

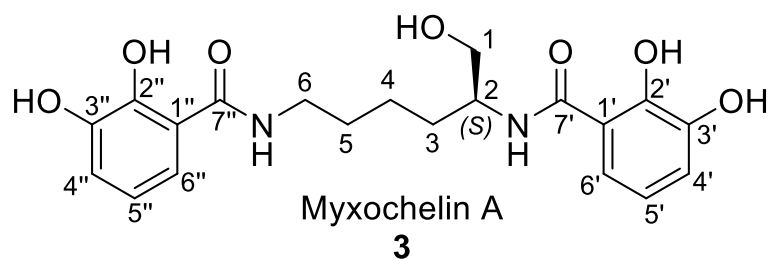

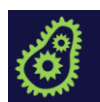

### 3. Biosynthetic *in silico* investigation

**Table S5.** Predicted functions of the encoded proteins by the Myxochelin BGC from MSr12020 (44350 bp).

| Gene                     | Size (aa) | Deduced function                                                     | Closest homolog | Coverage/Identity (%) | Sg a15 homolog <sup>1</sup> | So ce56 homolog <sup>1</sup> |
|--------------------------|-----------|----------------------------------------------------------------------|-----------------|-----------------------|-----------------------------|------------------------------|
| <i>orf1</i>              | 283       | Acetoacetate decarboxylase family protein                            | MCA9695171.1    | 86/62                 | ---                         | ---                          |
| <i>orf2</i>              | 345       | Hypothetical protein                                                 | WP_136924859.1  | 100/87                | ---                         | ---                          |
| <i>orf3</i>              | 200       | Glutathione S-transferase N-terminal domain-containing protein       | WP_061606175.1  | 100/88                | ---                         | ---                          |
| <i>orf4</i>              | 370       | Peptide-N-glycosidase                                                | WP_136924836.1  | 87/89                 | ---                         | ---                          |
| <i>orf5</i>              | 261       | Hypothetical protein                                                 | WP_043395572.1  | 98/38                 | ---                         | ---                          |
| <i>orf6</i>              | 216       | Hypothetical protein                                                 | WP_169508602.1  | 97/91                 | ---                         | ---                          |
| <i>mxkK</i>              | 399       | Myxochelin export MFS transporter MxcK                               | UQA63142.1      | 100/80                | 75/64                       | 54/36                        |
| <i>aroA<sub>A5</sub></i> | 486       | 3-deoxy-7-phosphoheptulonate synthase                                | WP_153824289.1  | 99/86                 | 61/44                       | ---                          |
| <i>mxkD</i>              | 415       | Isochorismate synthase DhcB                                          | WP_153824288.1  | 96/80                 | 65/52                       | 73/58                        |
| <i>mxkE</i>              | 554       | (2,3-dihydroxybenzoyl)adenylate synthase                             | WP_136928082.1  | 97/84                 | 78/66                       | 84/76                        |
| <i>mxkF</i>              | 307       | Isochorismatase family protein                                       | WP_136919899.1  | 100/84                | 71/53                       | 72/61                        |
| <i>mxkC</i>              | 258       | 2,3-dihydro-2,3-dihydroxybenzoate dehydrogenase                      | WP_153824285.1  | 100/88                | 77/66                       | 85/77                        |
| <i>mxkO</i>              | 324       | PepSY domain-containing protein                                      | WP_153824284.1  | 100/83                | ---                         | 83/69                        |
| <i>mxkJ</i>              | 407       | Hypothetical protein                                                 | WP_153824283.1  | 100/83                | ---                         | 76/66                        |
| <i>mxkH</i>              | 847       | TonB-dependent siderophore myxochelin receptor MxcH                  | WP_136928077.1  | 100/85                | 66/52                       | 72/61                        |
| <i>mxkL</i>              | 439       | Aminotransferase class III-fold pyridoxal phosphate-dependent enzyme | WP_136928076.1  | 100/88                | 77/62                       | 87/79                        |
| <i>mxkG</i>              | 1449      | Myxochelin NRPS MxcG                                                 | WP_136928075.1  | 100/81                | 74/62                       | 77/68                        |
| <i>orf8</i>              | 259       | SDR family oxidoreductase                                            | WP_093287969.1  | 100/67                | ---                         | ---                          |
| <i>orf9</i>              | 296       | LysR family transcriptional regulator                                | WP_114828546.1  | 98/75                 | ---                         | ---                          |
| <i>orf10</i>             | 236       | Siderophore-interacting protein                                      | WP_130432947.1  | 91/70                 | ---                         | ---                          |
| <i>orf11</i>             | 156       | DNA-binding MarR family transcriptional regulator                    | RZT94937.1      | 85/63                 | ---                         | ---                          |
| <i>orf12</i>             | 1109      | Hypothetical protein                                                 | KYF73658.1      | 86/53                 | ---                         | ---                          |
| <i>orf13</i>             | 465       | Ig-like domain-containing protein                                    | WP_169508603.1  | 100/83                | ---                         | ---                          |
| <i>orf14</i>             | 319       | Alpha/beta hydrolase                                                 | WP_136929219.1  | 99/83                 | ---                         | ---                          |
| <i>orf15</i>             | 225       | Coq4 family protein                                                  | WP_136924851.1  | 100/82                | ---                         | ---                          |
| <i>orf16</i>             | 200       | TetR/AcrR family transcriptional regulator                           | WP_136924852.1  | 96/88                 | ---                         | ---                          |
| <i>orf17</i>             | 358       | Hypothetical protein                                                 | WP_136923881.1  | 82/84                 | ---                         | ---                          |
| <i>orf18</i>             | 377       | VWA domain-containing protein                                        | UQA60575.1      | 100/76                | ---                         | ---                          |
| <i>orf19</i>             | 766       | Immune inhibitor A                                                   | WP_136923883.1  | 100/74                | ---                         | ---                          |
| <i>orf20</i>             | 409       | Cytochrome P450                                                      | WP_136924847.1  | 100/89                | ---                         | ---                          |
| <i>orf21</i>             | 399       | Chitinase                                                            | WP_136924846.1  | 100/83                | ---                         | ---                          |
| <i>orf22</i>             | 377       | Gfo/Idh/MocA family oxidoreductase                                   | WP_169508601.1  | 99/85                 | ---                         | ---                          |

<sup>1</sup> Pairwise Positive (BLSM62)/Pairwise Identity

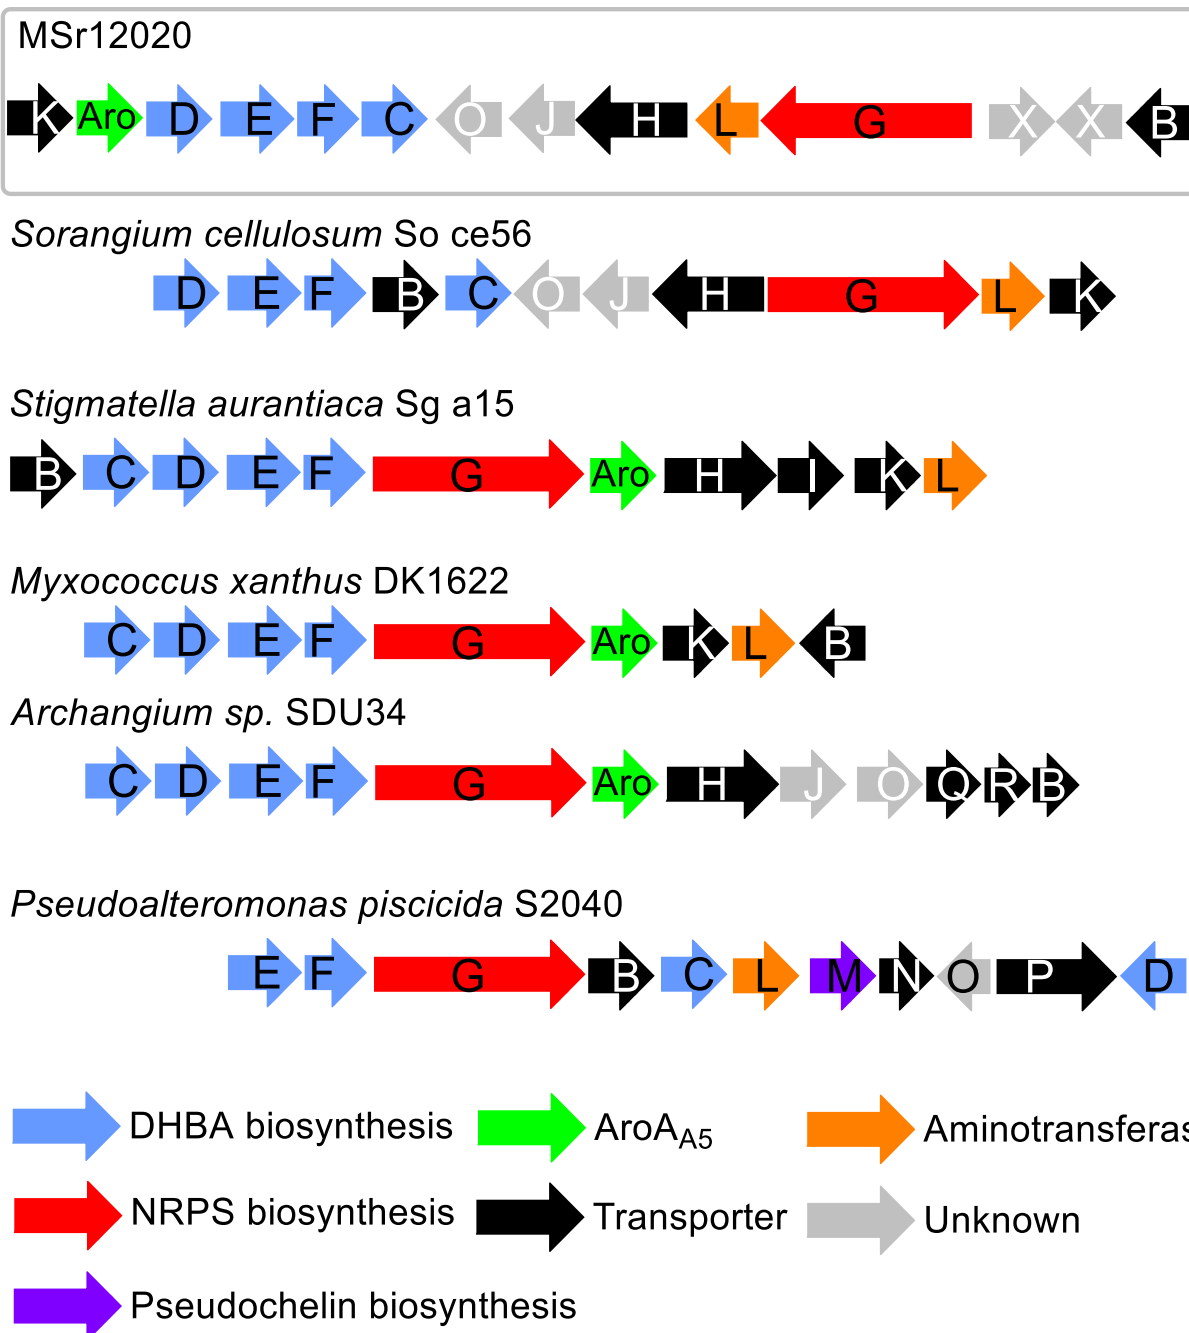

**Figure S13.** Comparison of *mx*c BGCs that have been characterized to produce different myxochelins in different myxobacterial strains and *Pseudomonasalteromonas piscicida*. Genes were depicted in different colors according to biological functions.

#### 4. Metabolome database search of 1–3

Alternatives producer of **1** from in-house metabolome database

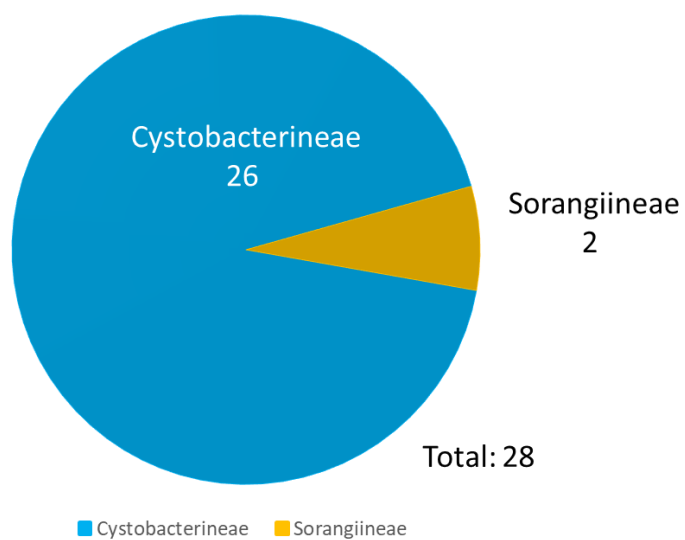

**Figure S14.** Alternative producers of **1** from our in-house metabolome database sorted by suborder. Search parameters: exact mass deviation <5ppm, retention time deviation <0.3 min, area threshold  $3 \times 10^4$ . The production of **1** was always co-occurring with the production of **2** and **3**.

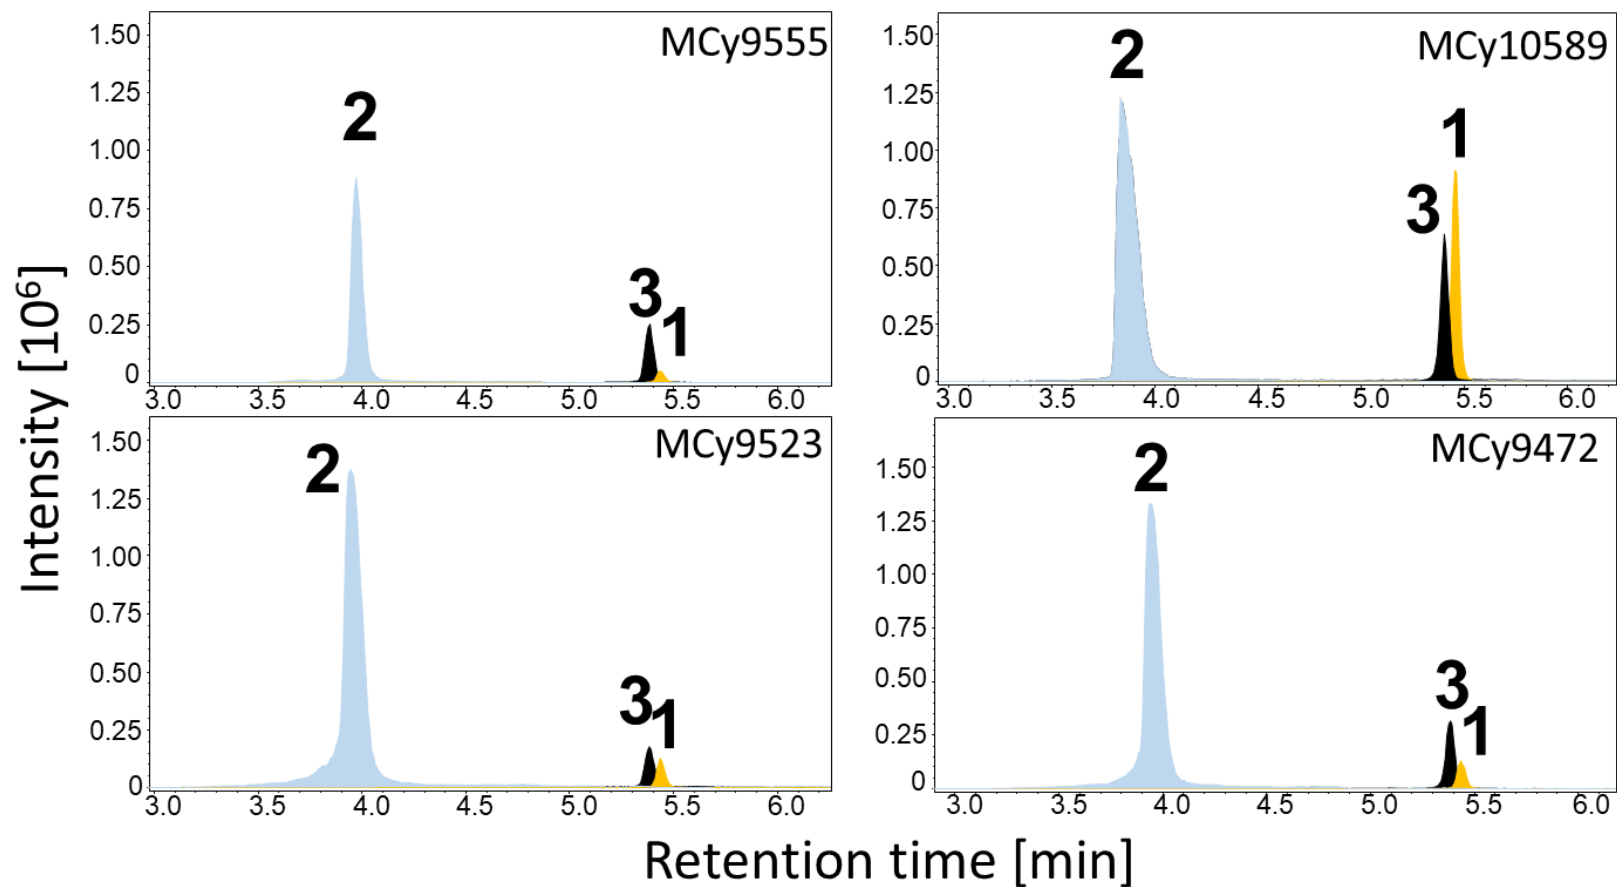

**Figure S15.** . High performance liquid chromatography–mass spectrometry extracted ion chromatograms (HPLC–MS EIC) of **1** orange ( $[M + H]^+$  504.1976 m/z, (orange), **2** ( $[M + H]^+$  404.1819 m/z, blue), and **3** ( $[M + H]^+$  405.1658 m/z, black) from the myxobacterial crude extracts of MCy9555, MCy10589, MCy9523 and MCy9472.

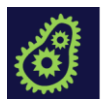

## 5. $^1\text{H}$ and $^{13}\text{C}$ NMR spectra

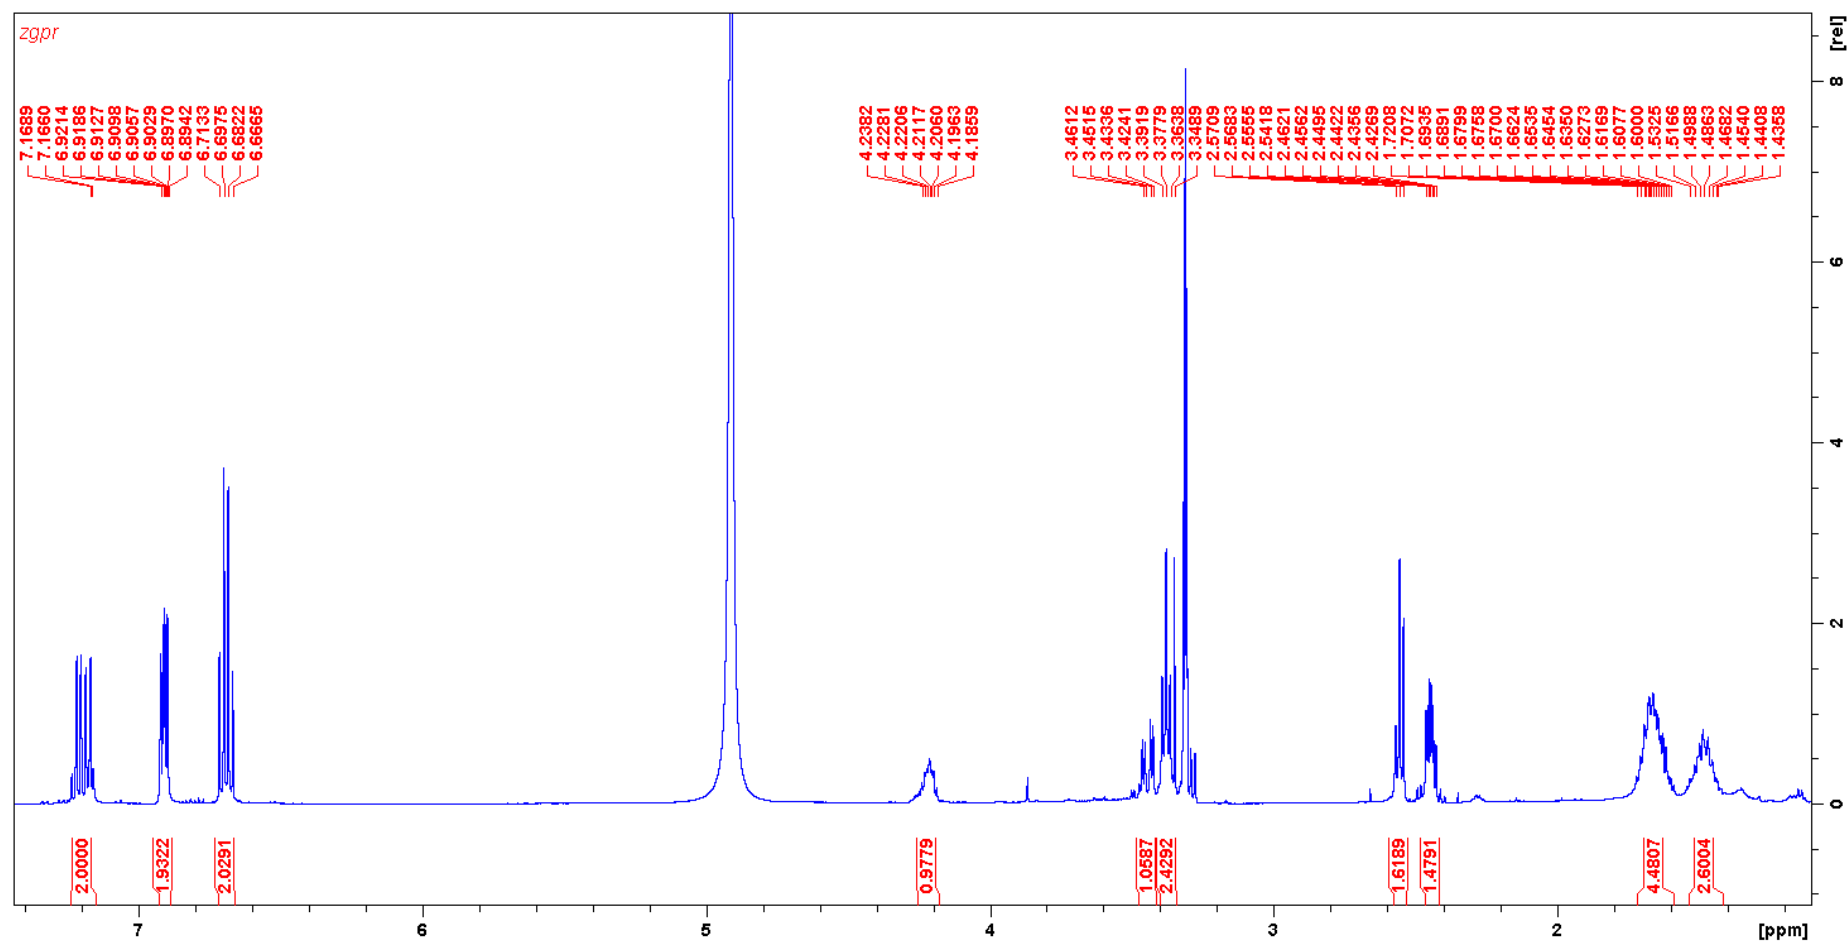

**Figure S16:**  $^1\text{H}$  NMR of compound **1**.

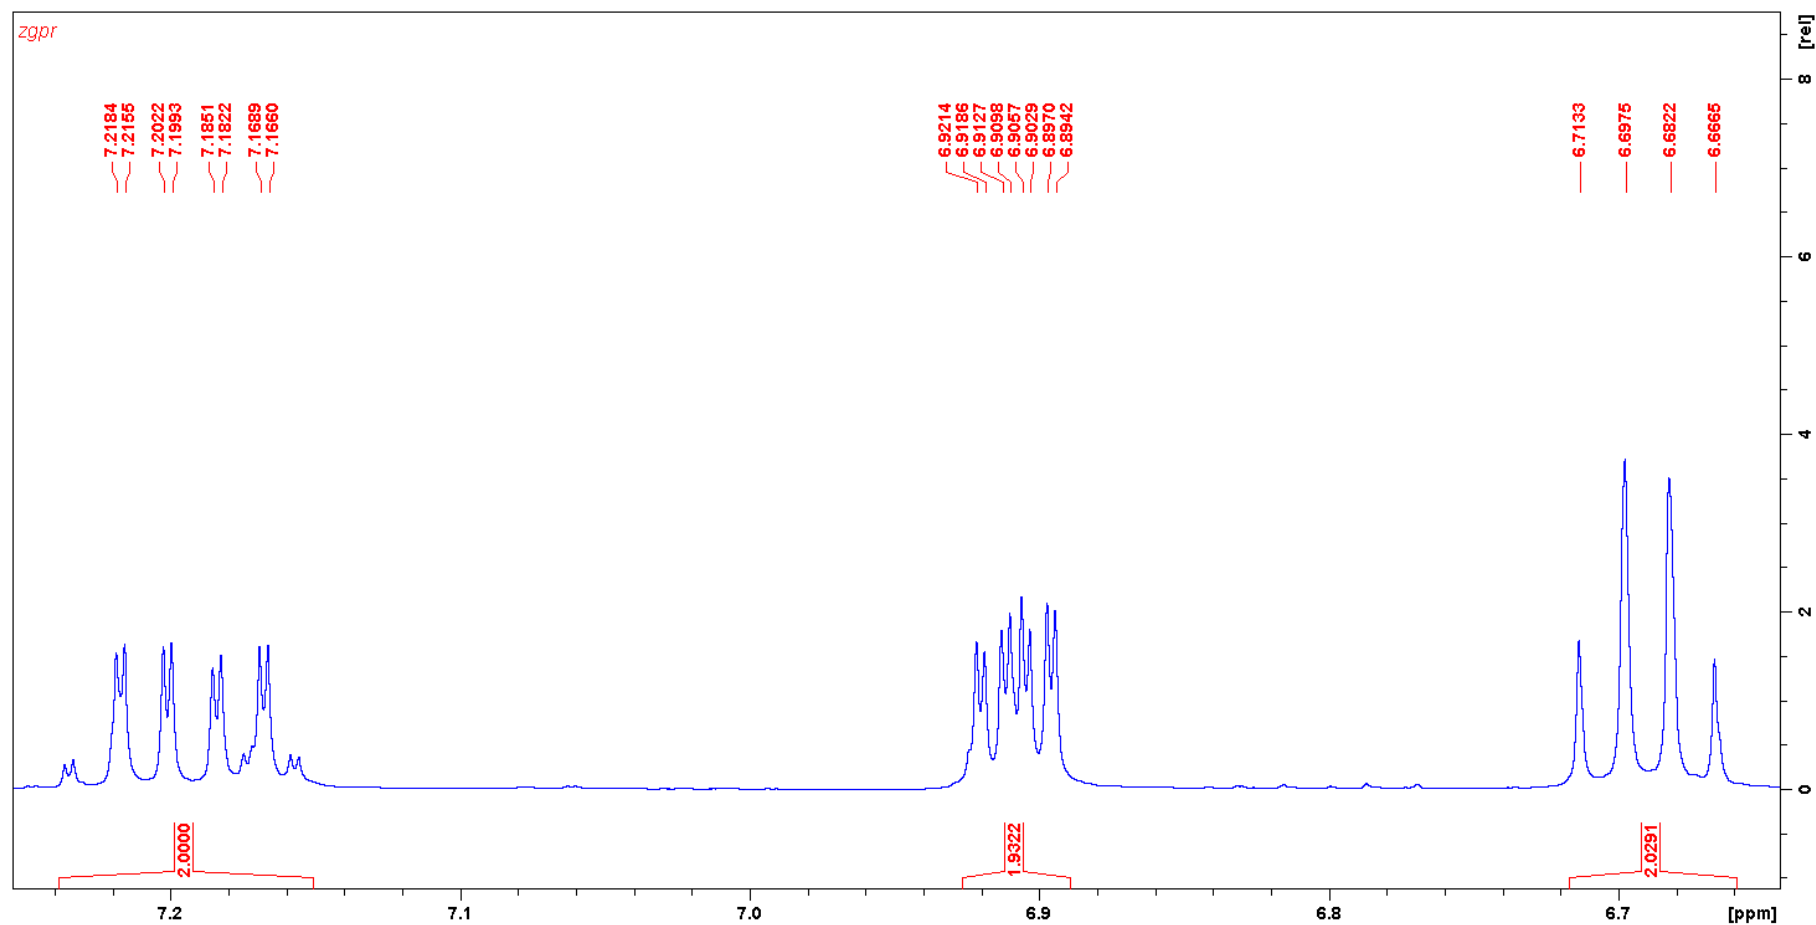

**Figure S17:**  $^1\text{H}$  NMR spectrum of compound **1** (expanded 1).

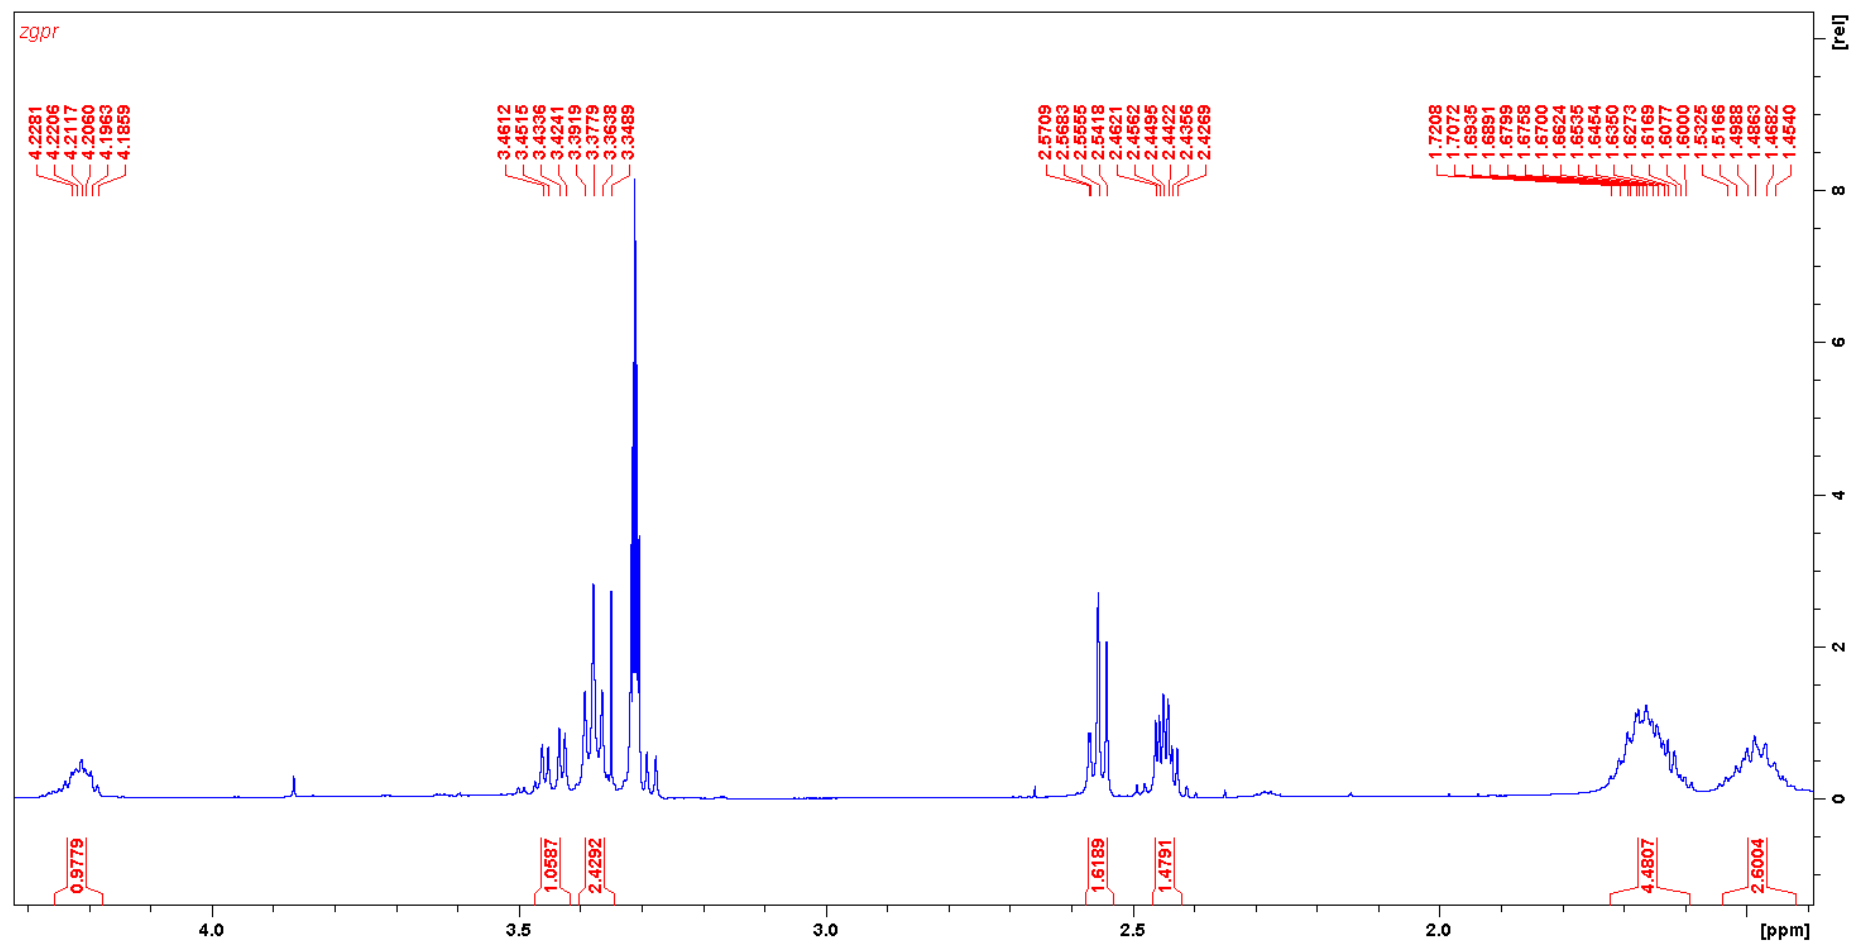

**Figure S18:** <sup>1</sup>H NMR spectrum of compound **1** (expanded 2).

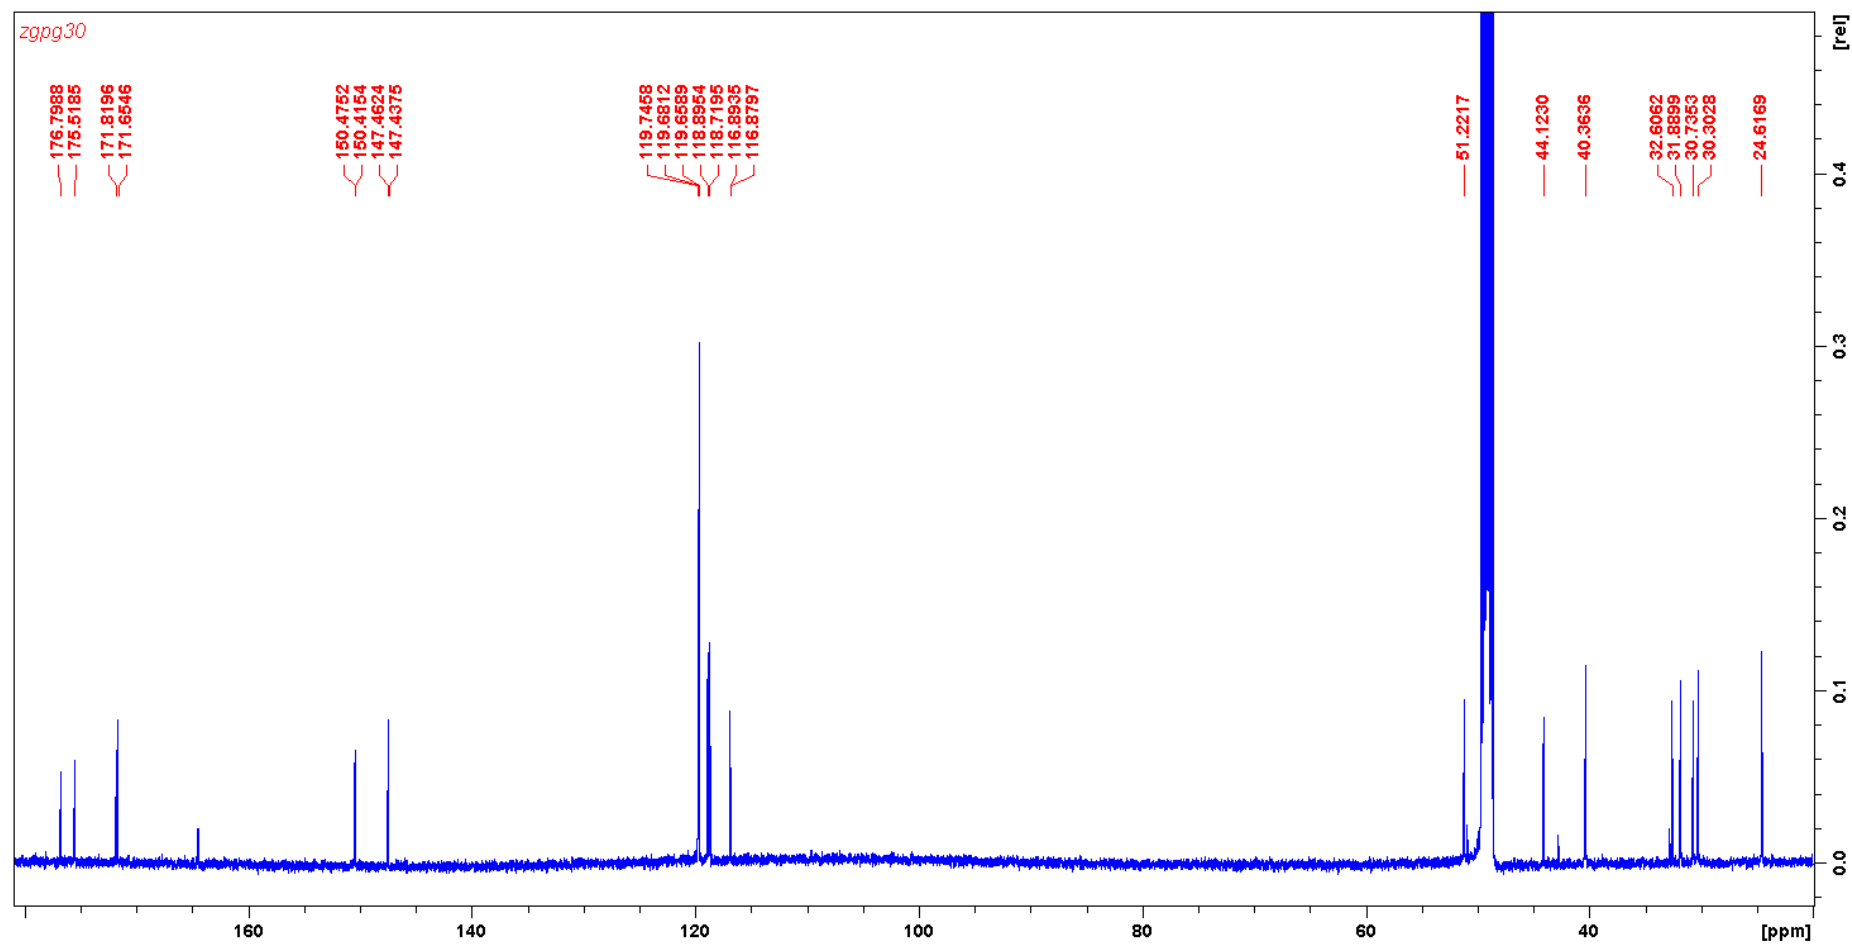

**Figure S19:**  $^{13}\text{C}$  NMR spectrum of compound **1**.

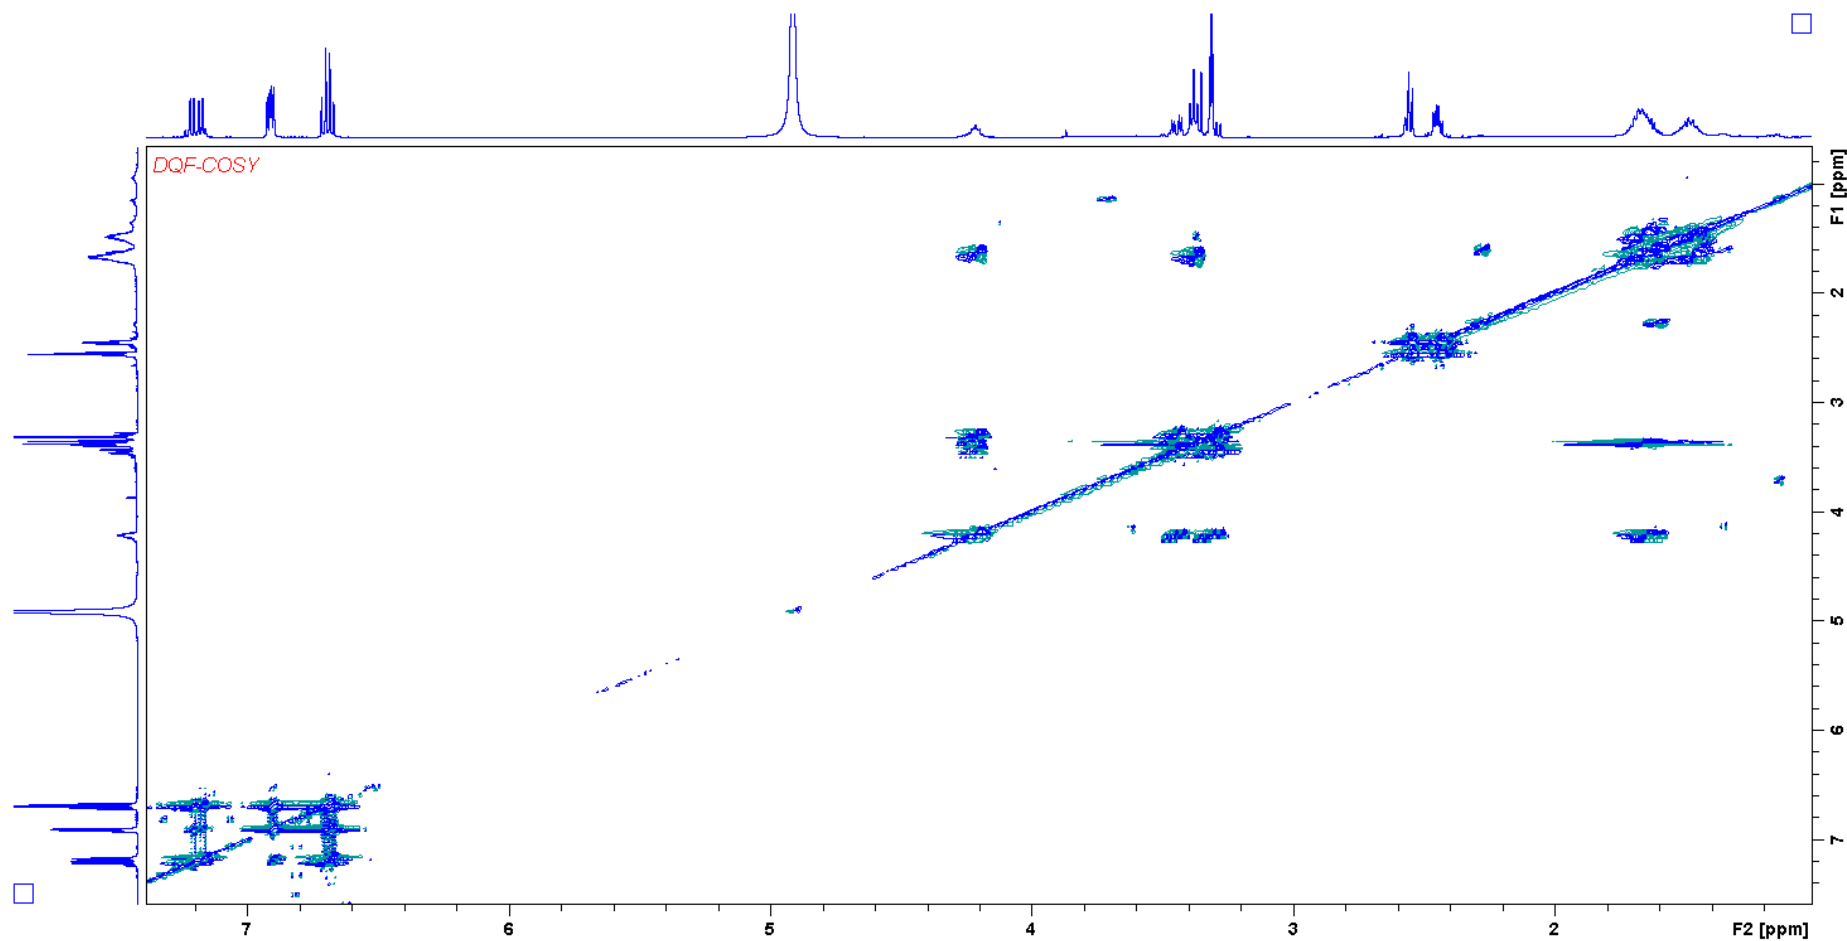

**Figure S20:**  $^1\text{H}$ - $^1\text{H}$  DQF-COSY spectrum of compound **1**.

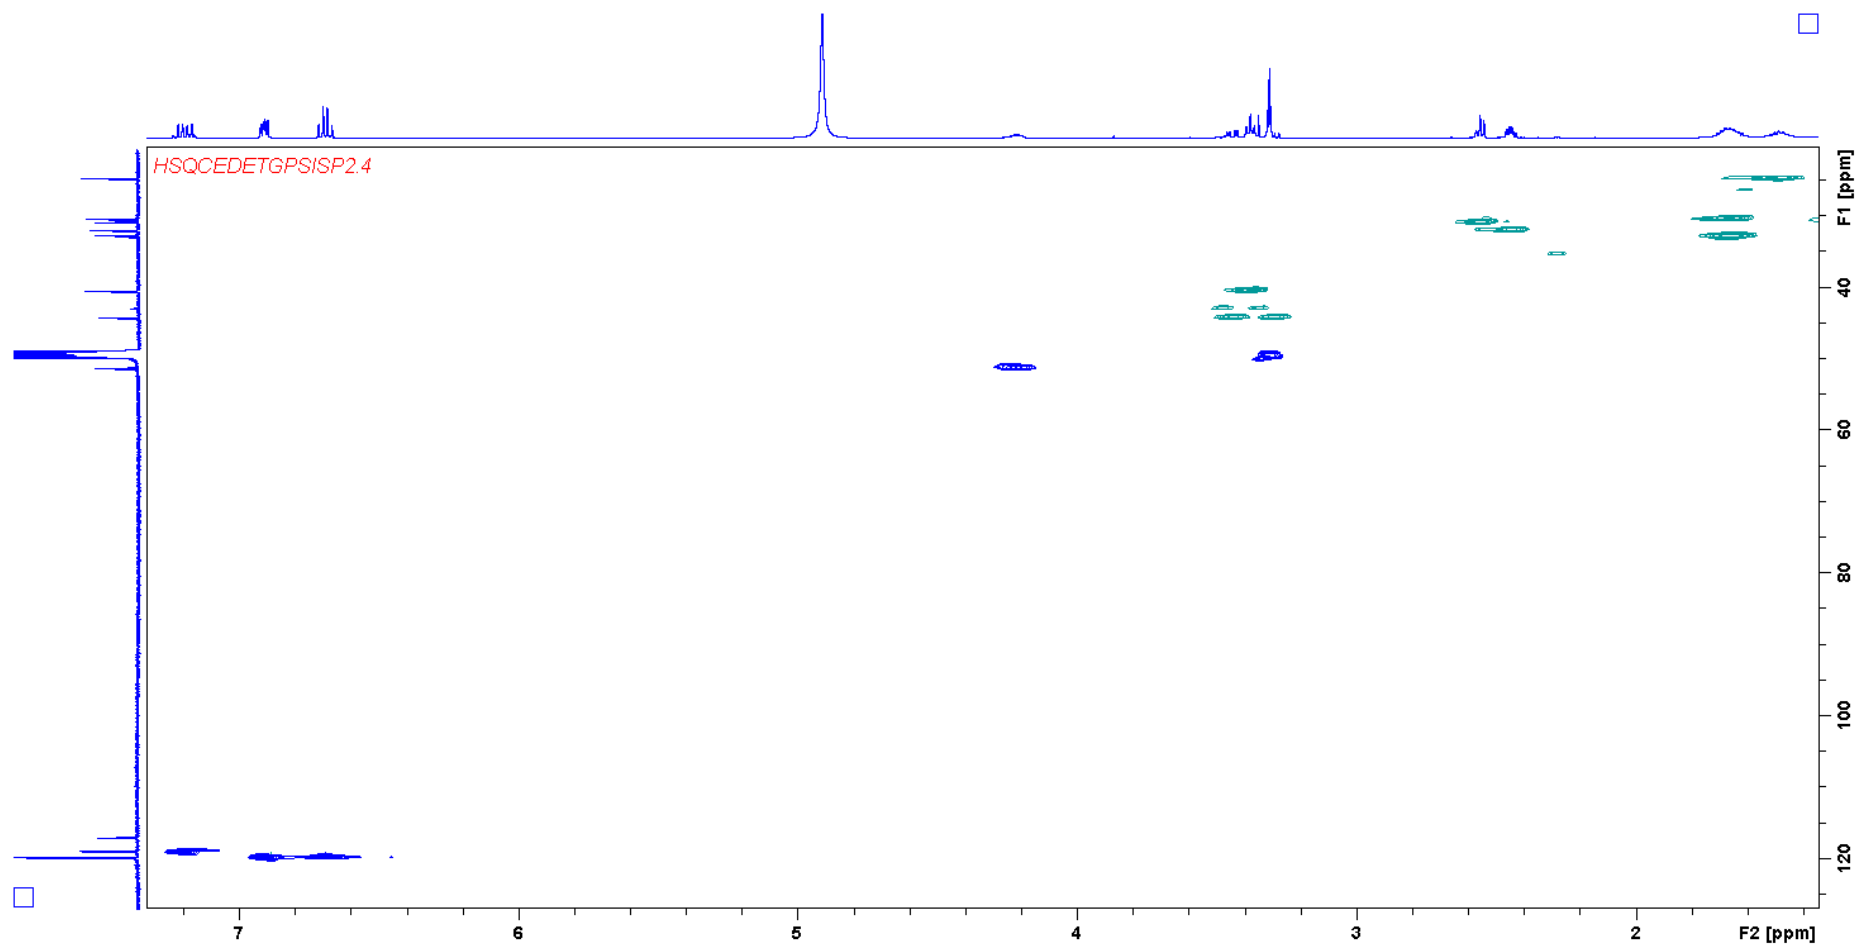

**Figure S21:** HSQC spectrum of compound **1**.

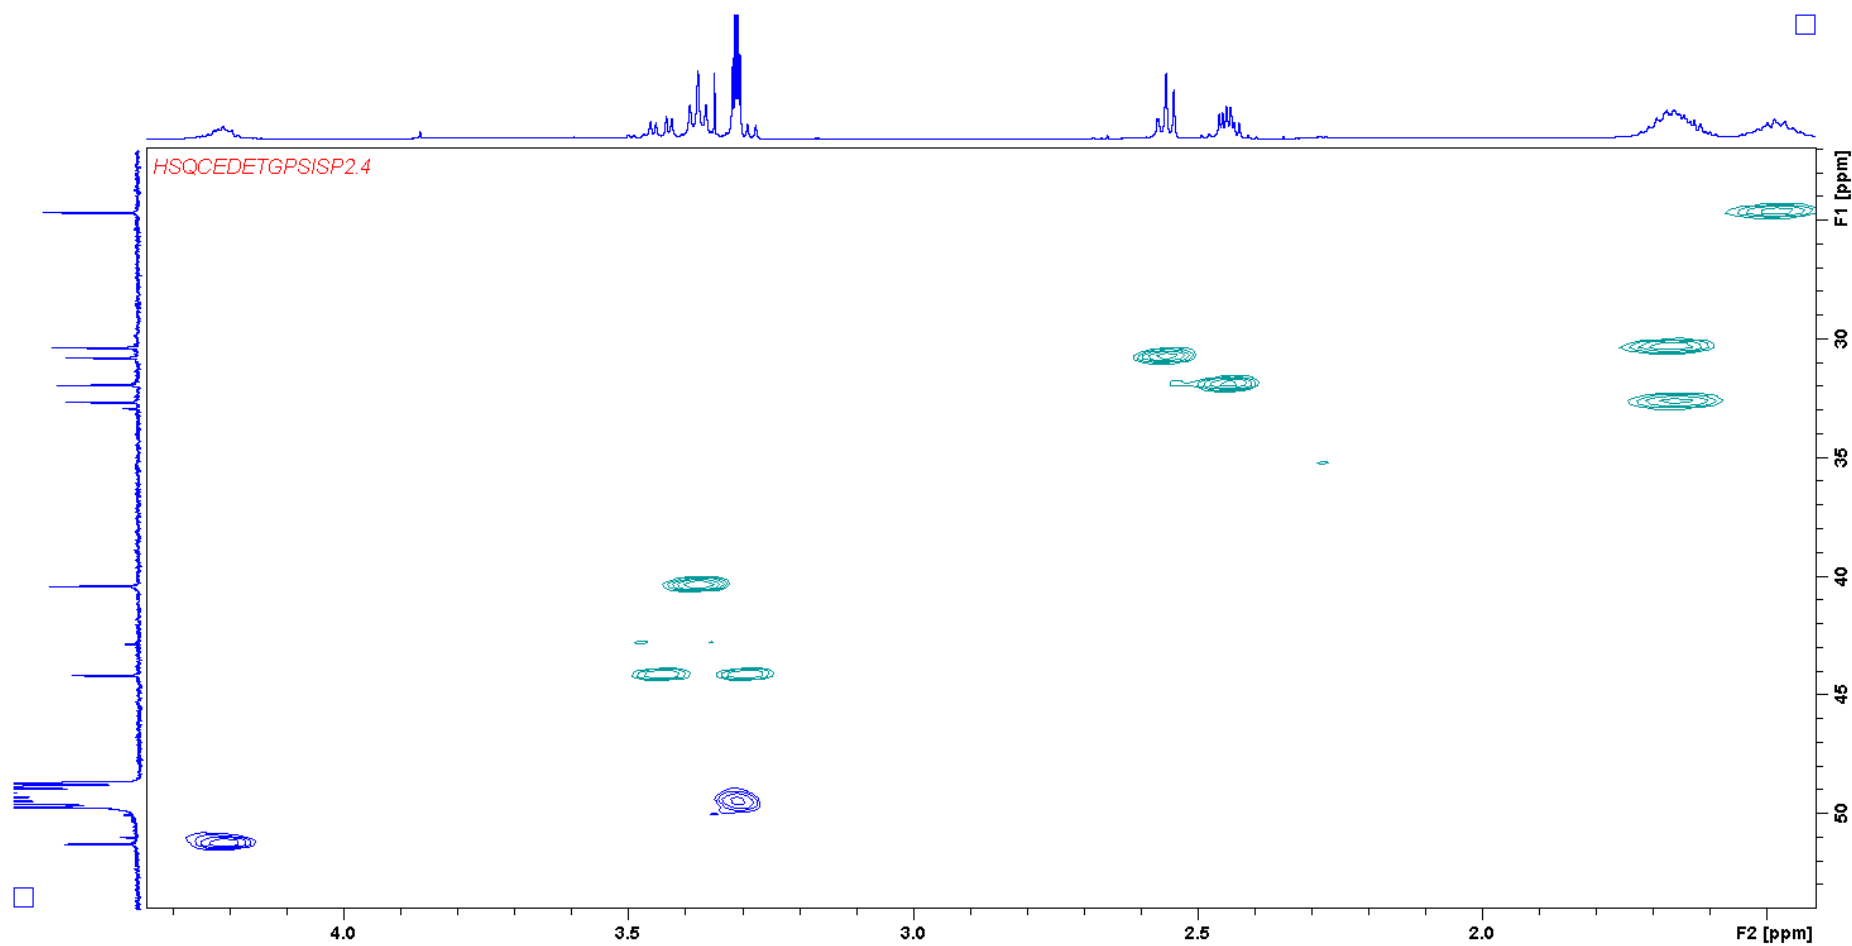

**Figure S22:** HSQC spectrum of compound **1** (expanded).

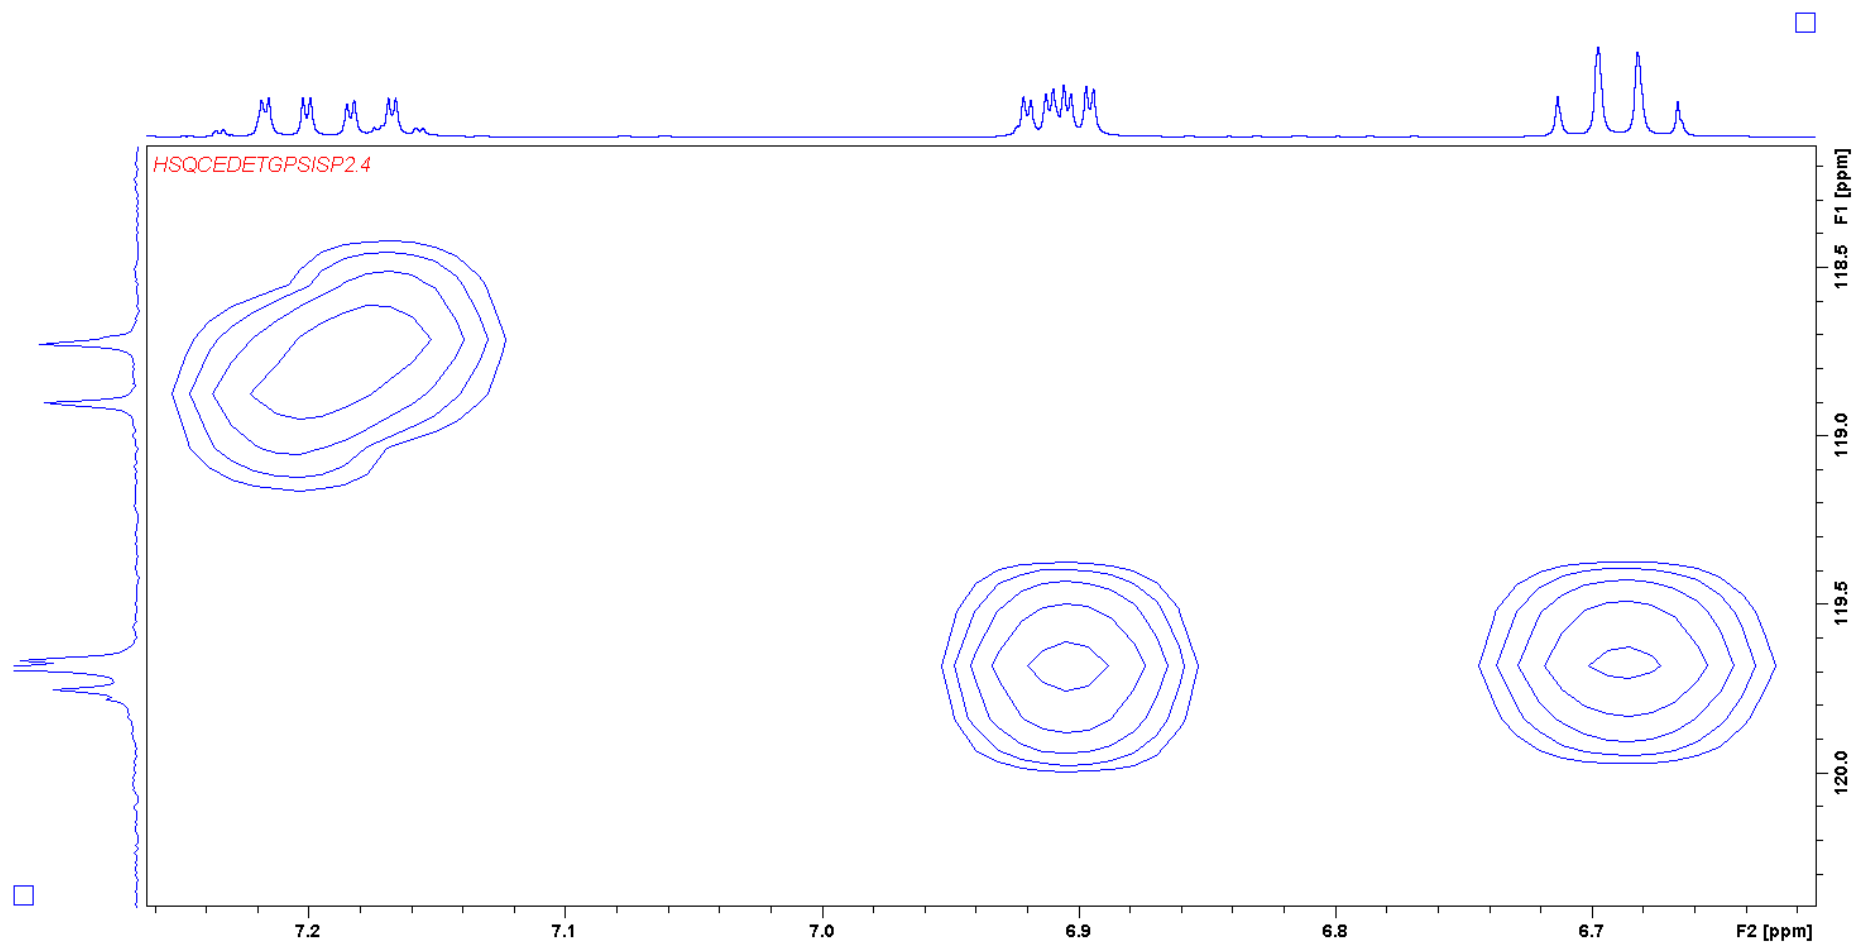

**Figure S23:** HSQC spectrum of compound **1** (expanded).

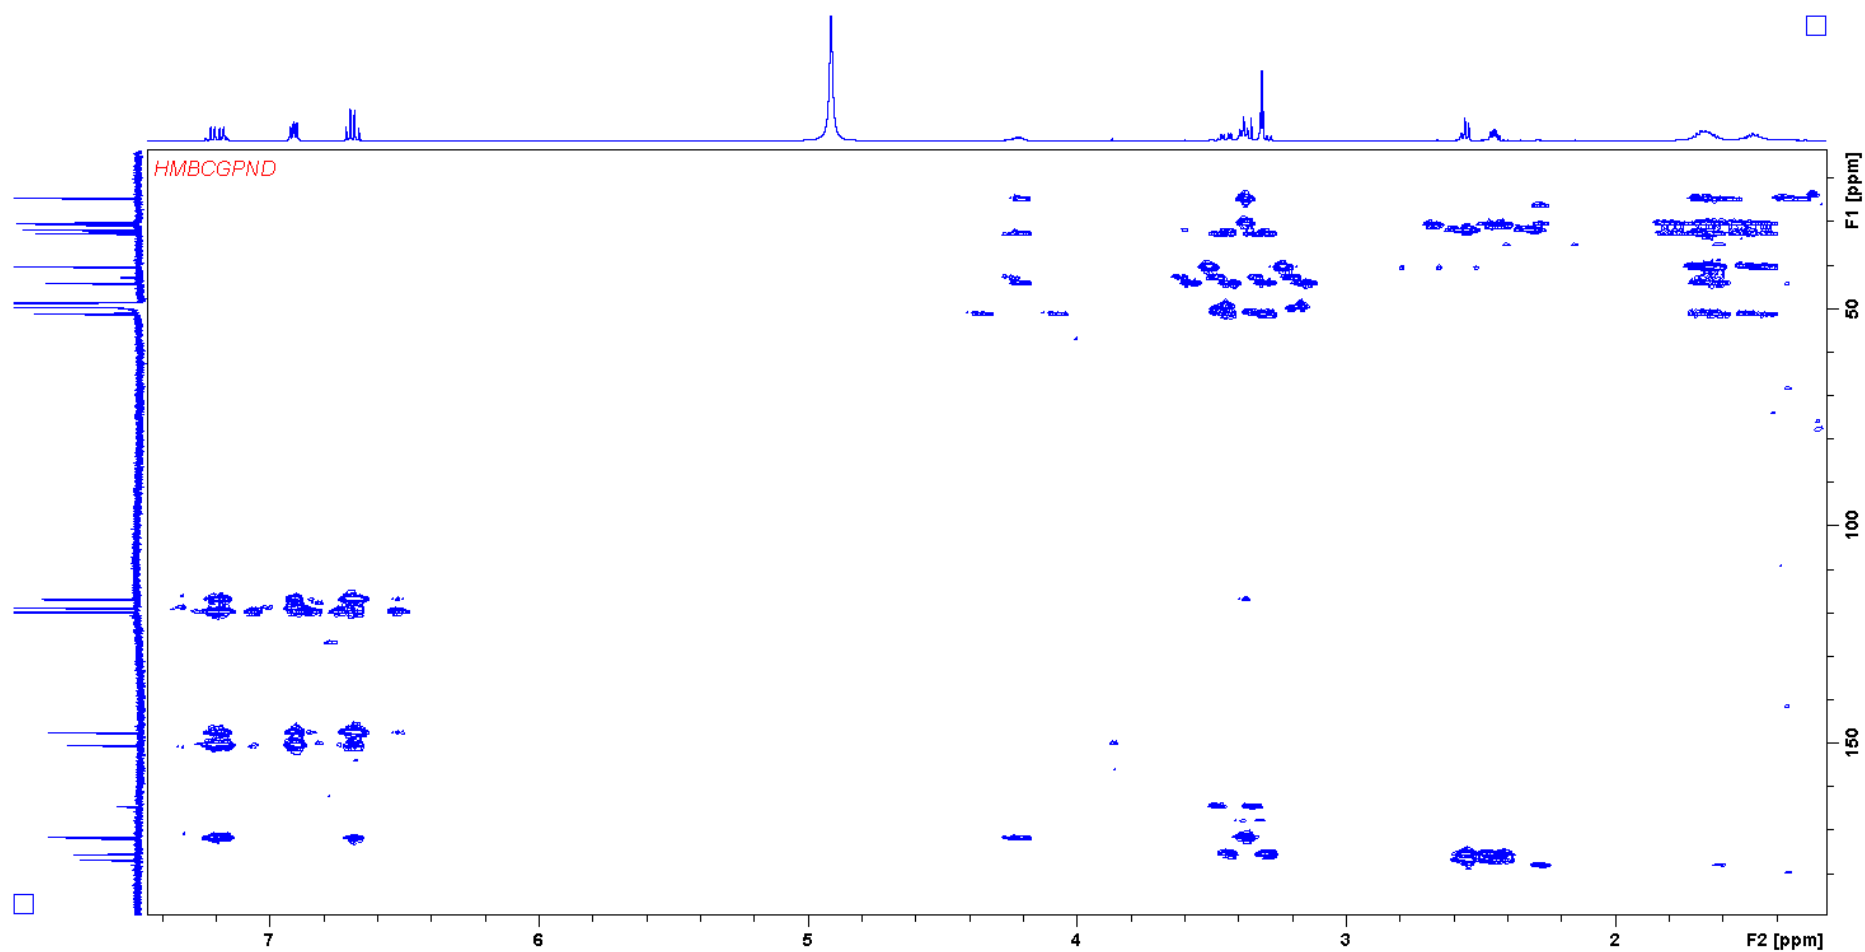

**Figure S24:**  $^1\text{H}$ - $^{13}\text{C}$  HMBC spectrum of compound **1**.

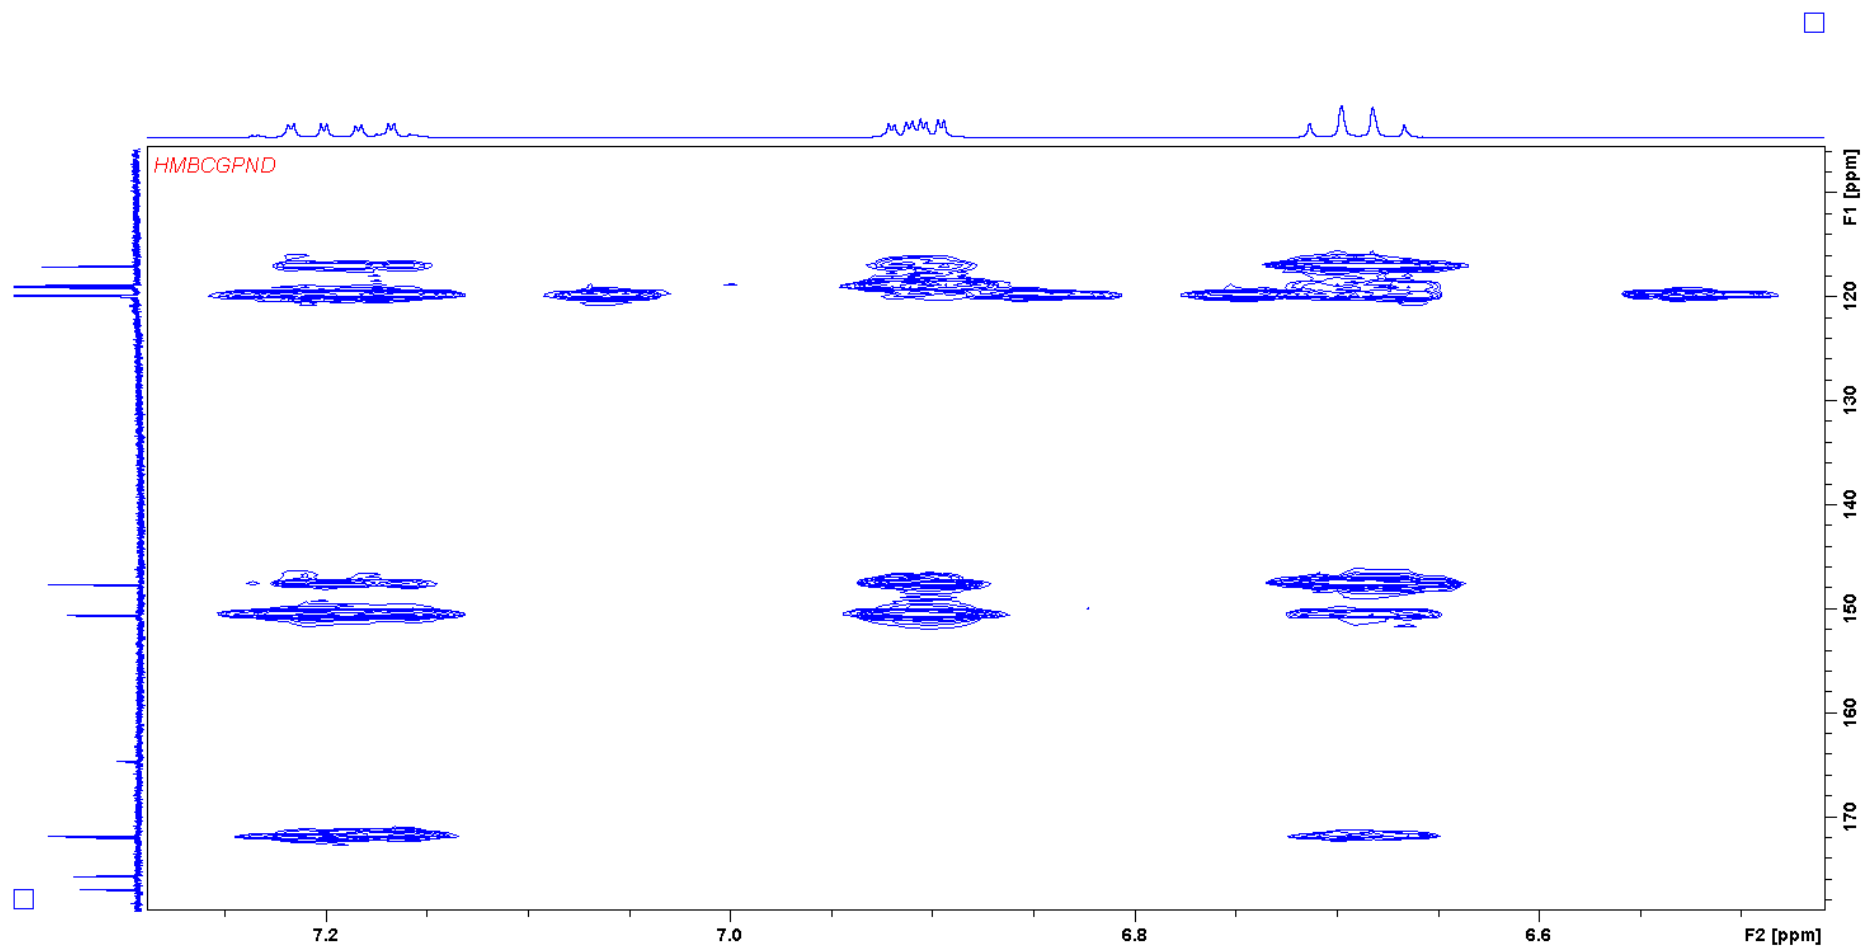

**Figure S25:**  $^1\text{H}$ - $^{13}\text{C}$  spectrum of compound **1** (expanded).

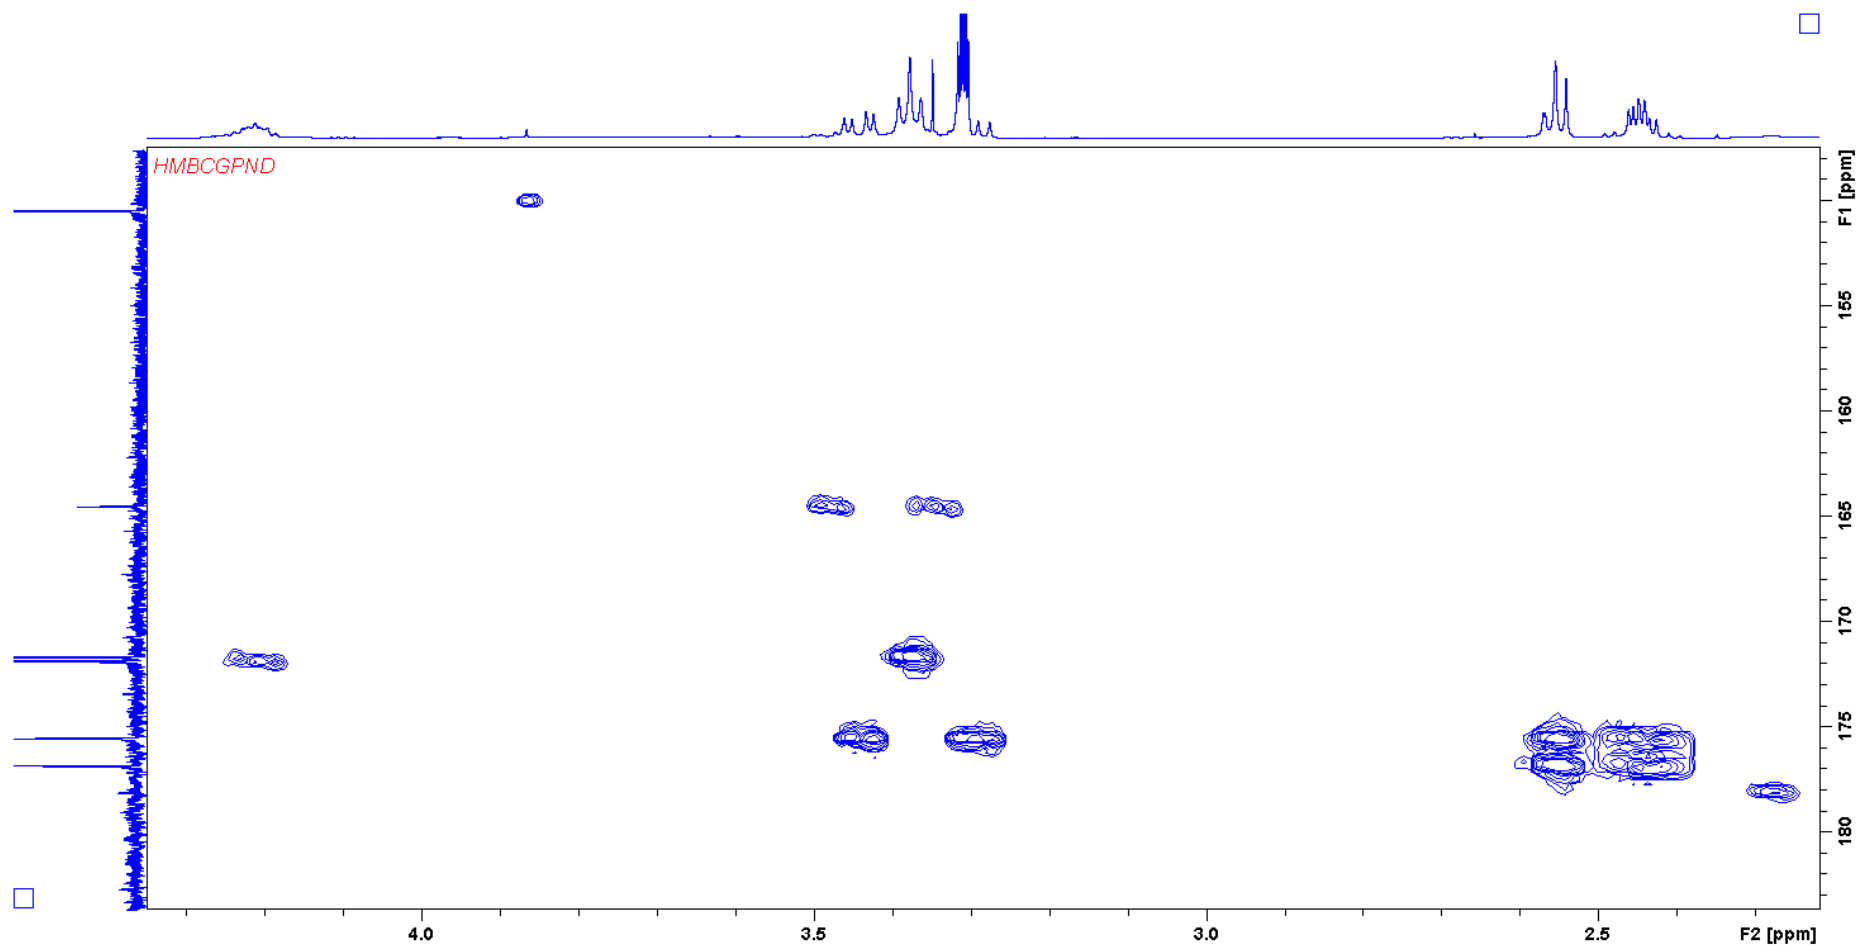

**Figure S26.**  $^1\text{H}$ - $^{13}\text{C}$  HMBC spectrum of compound **1** (expanded).

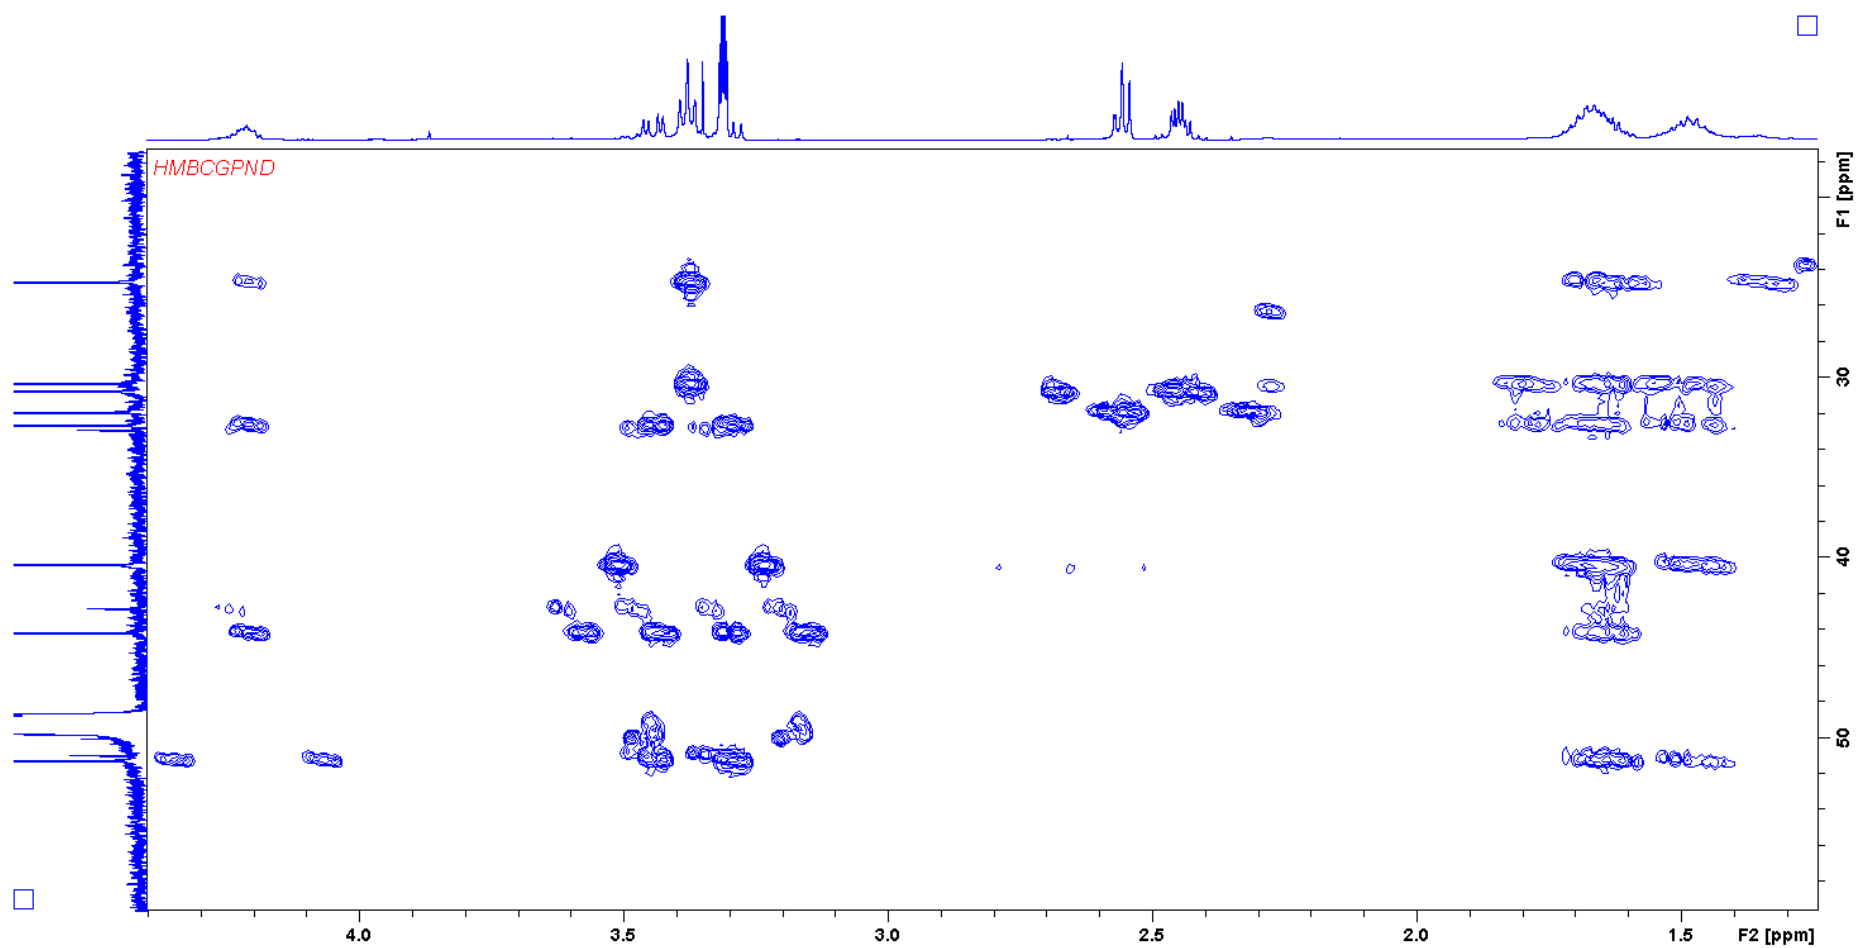

**Figure S27:**  $^1\text{H}$ - $^{13}\text{C}$  spectrum of compound **1** (expanded).

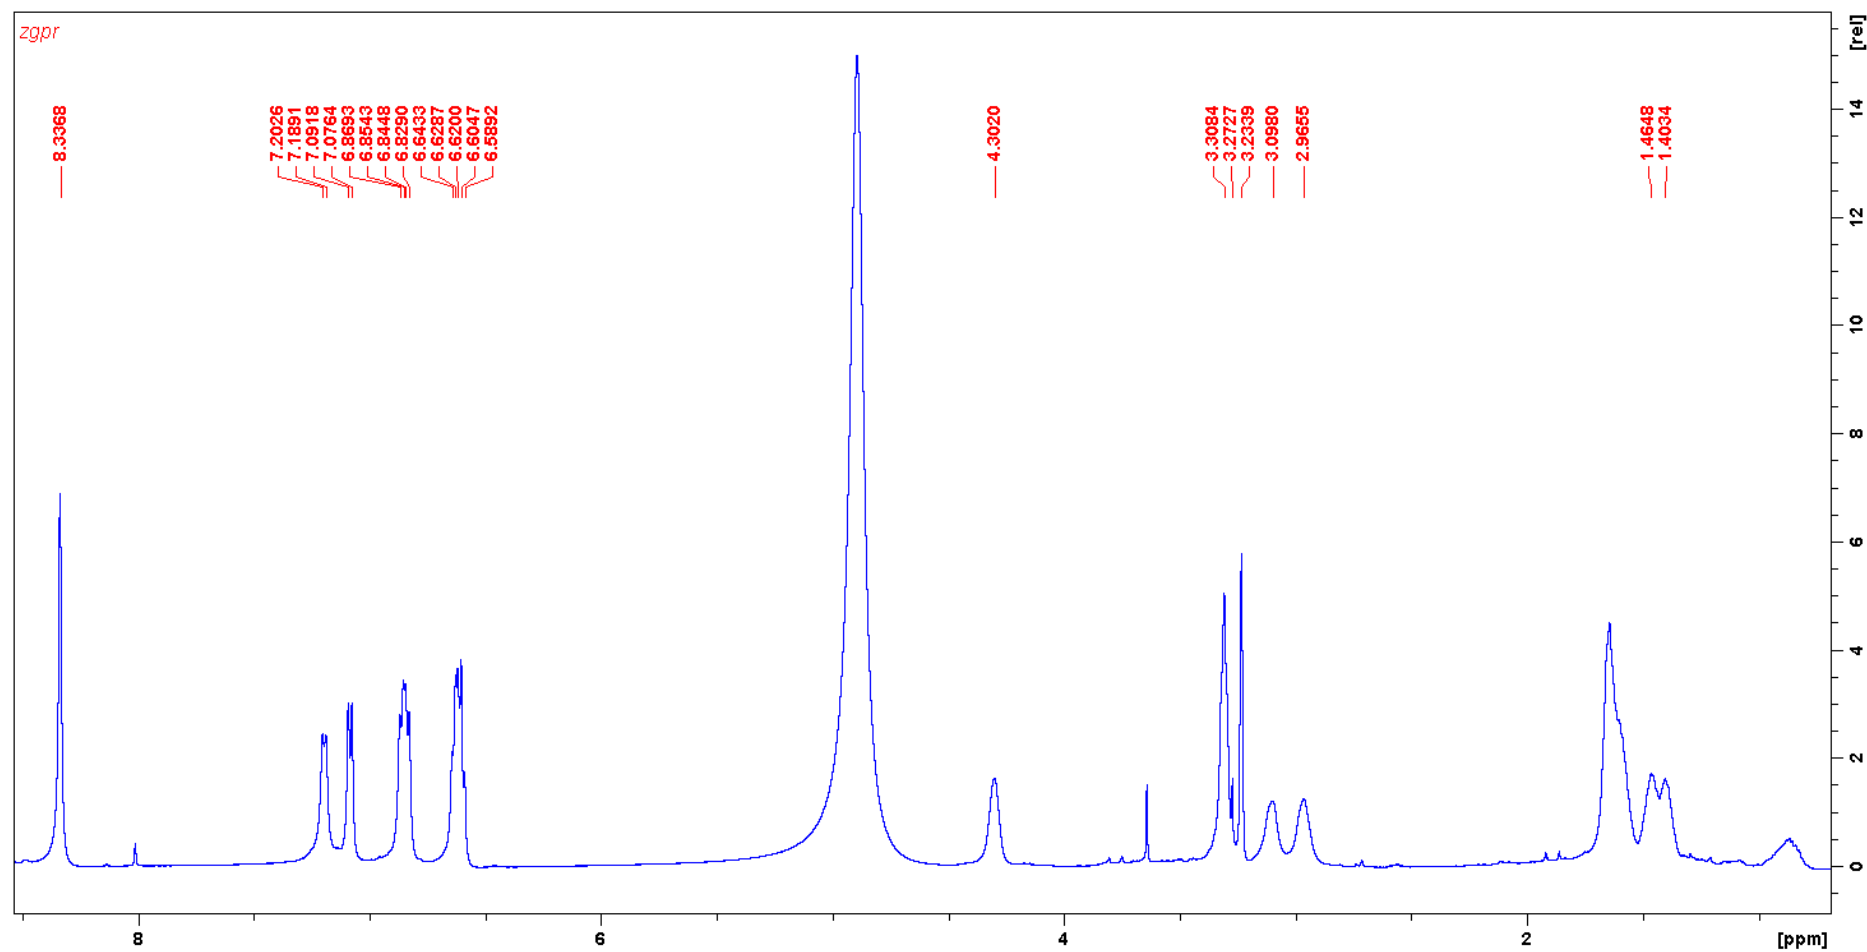

**Figure S28:**  $^1\text{H}$  NMR spectrum of compound **2**.

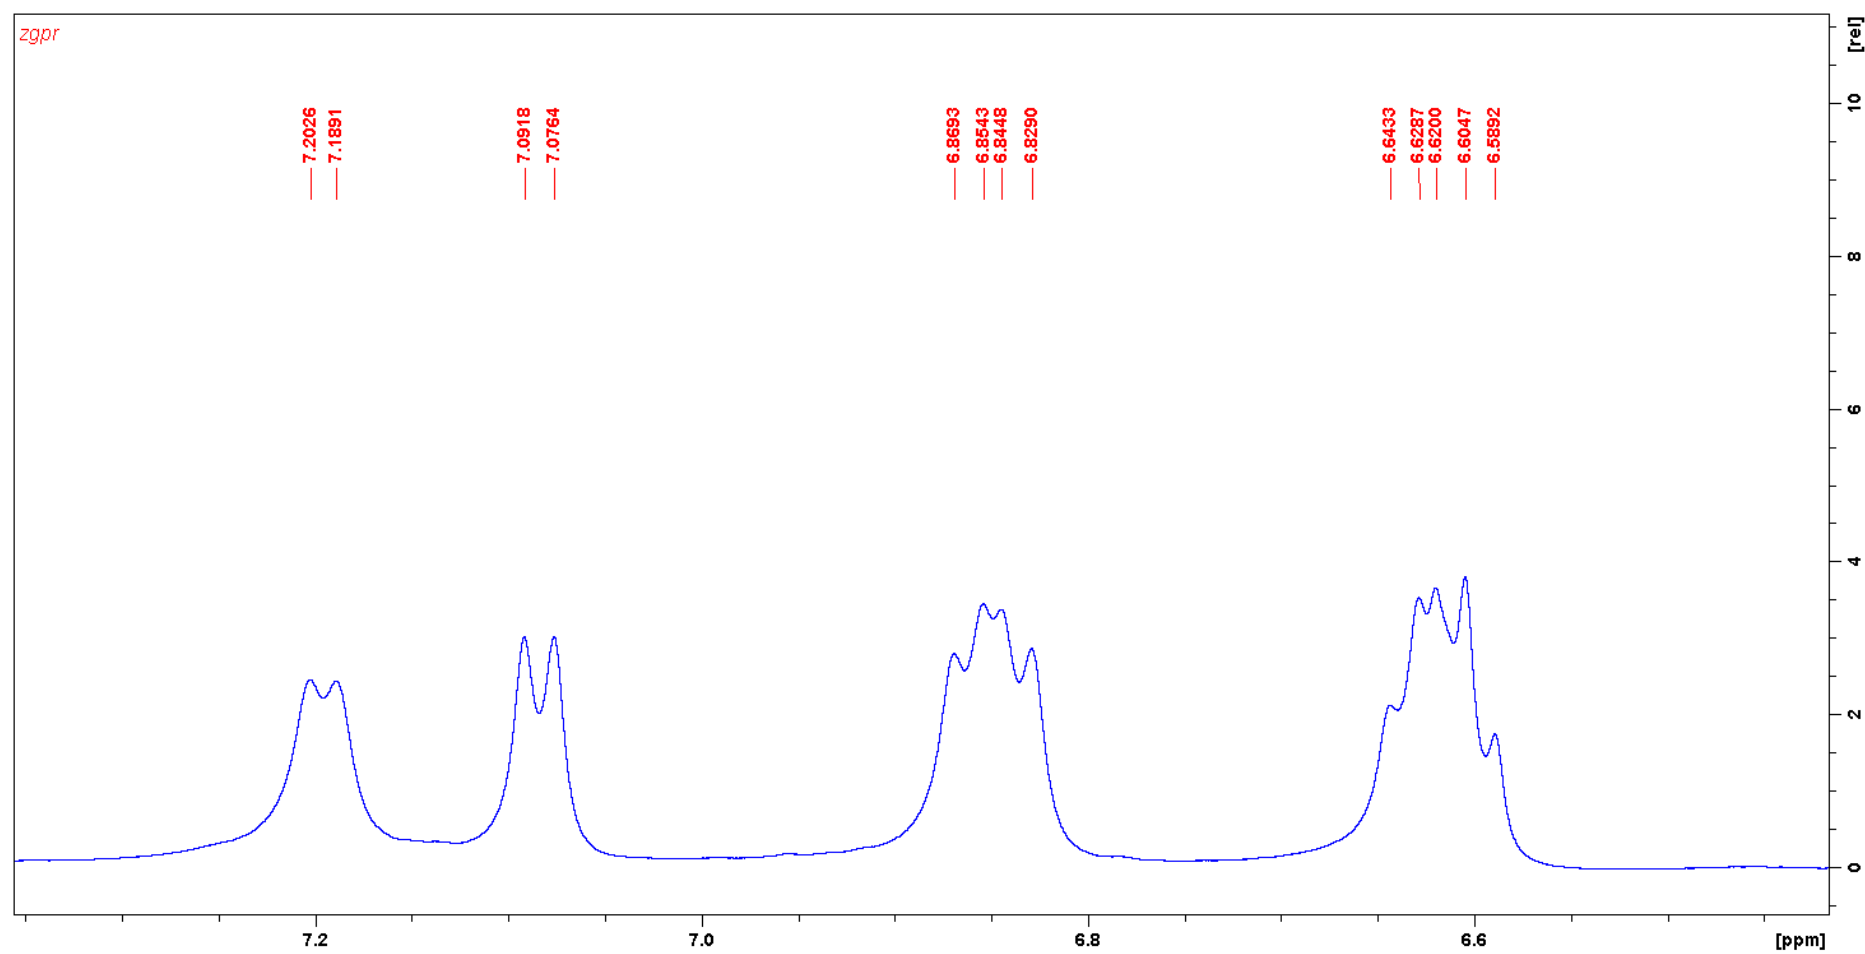

**Figure S29:**  $^1\text{H}$  NMR spectrum of compound **2** (expanded).

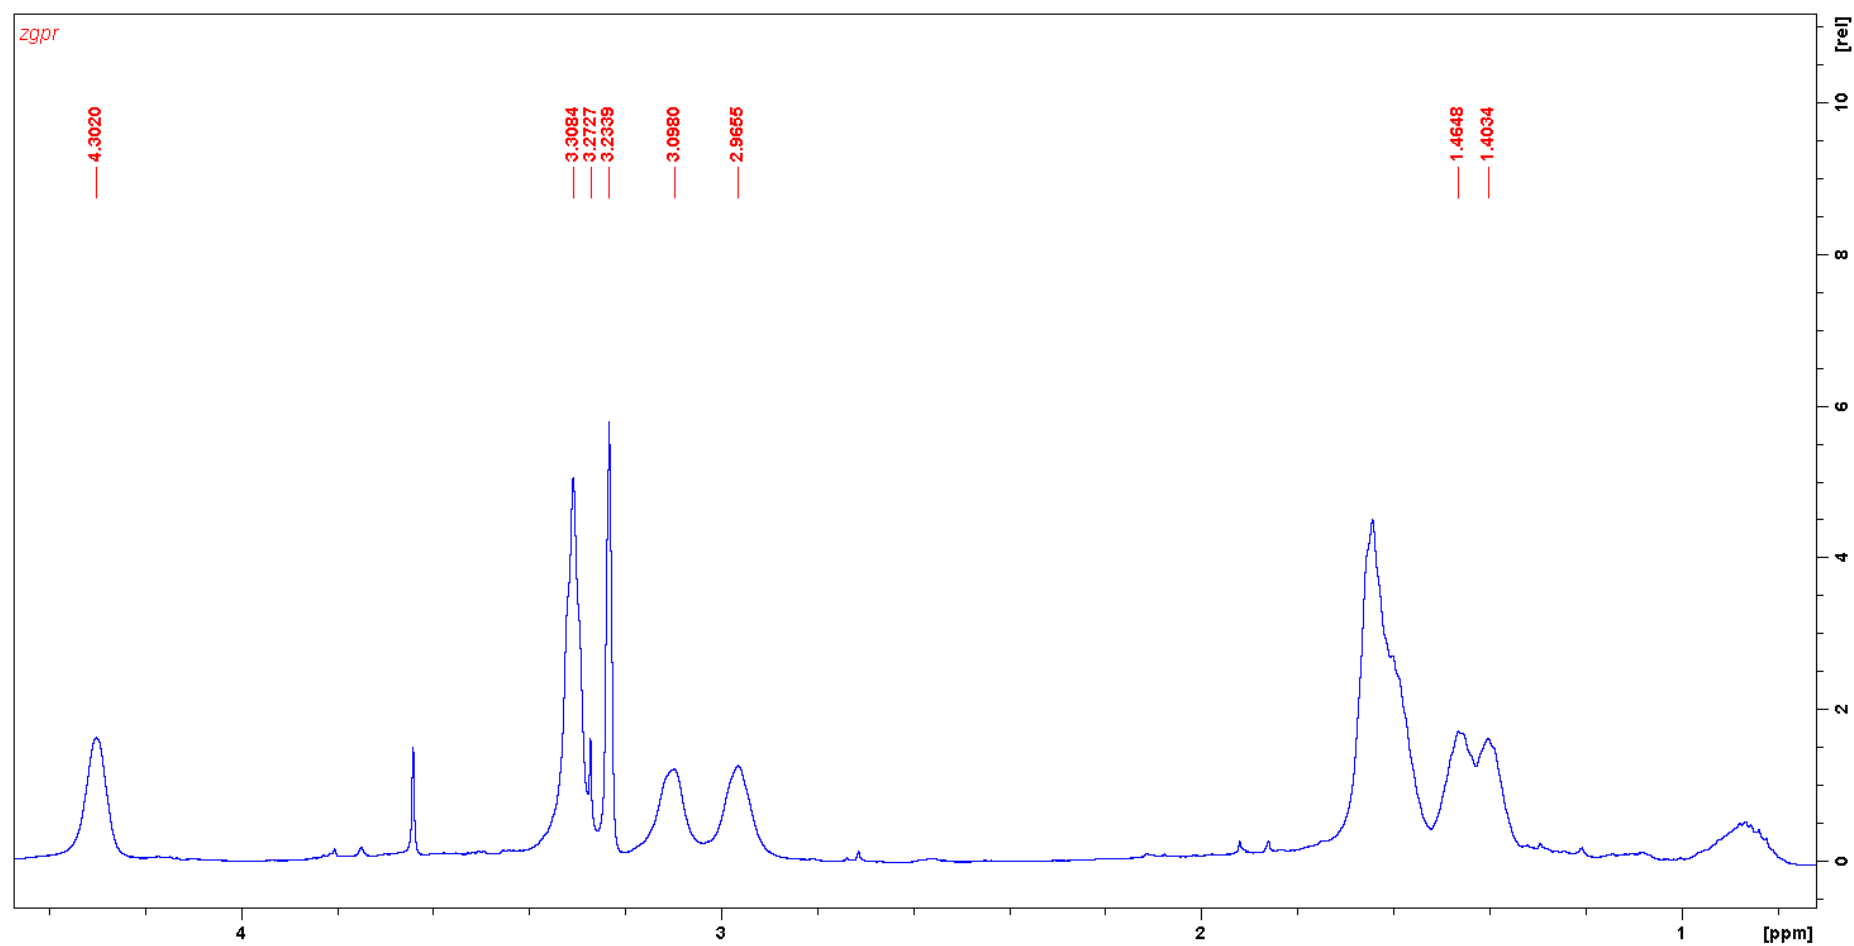

**Figure S30:**  $^1\text{H}$  NMR spectrum of compound **2** (expanded).

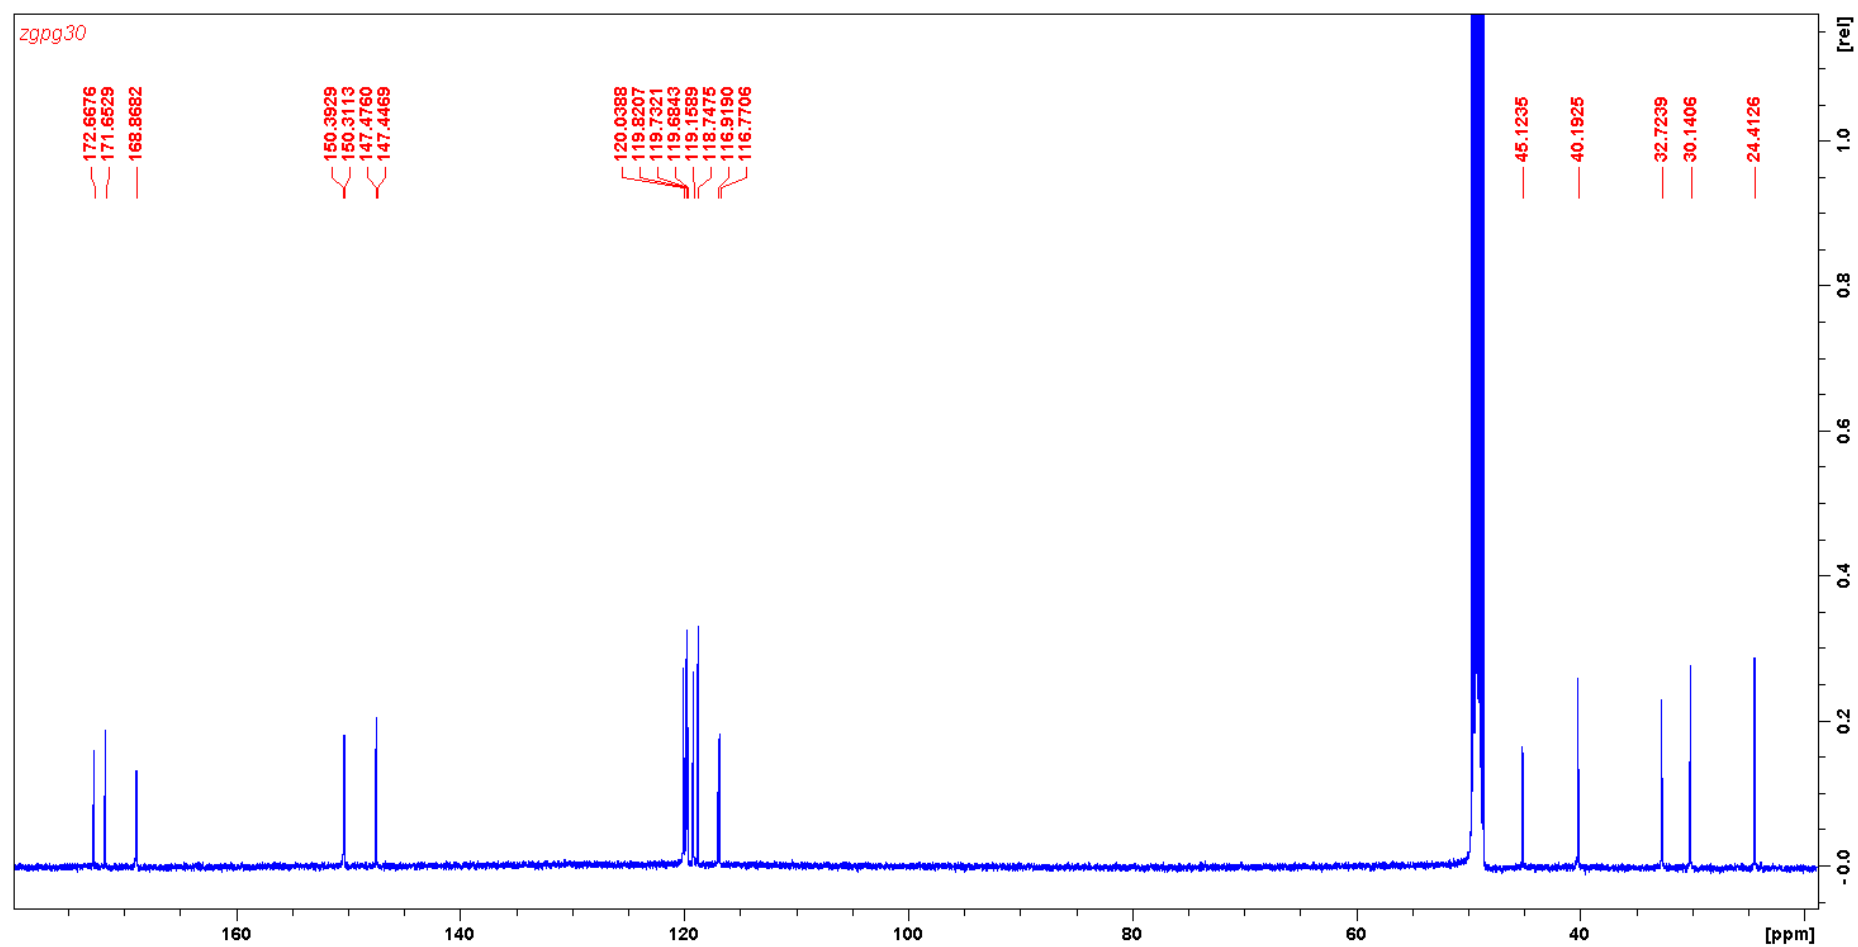

**Figure S31.**  $^{13}\text{C}$  NMR spectrum of compound **2** in MeOD.

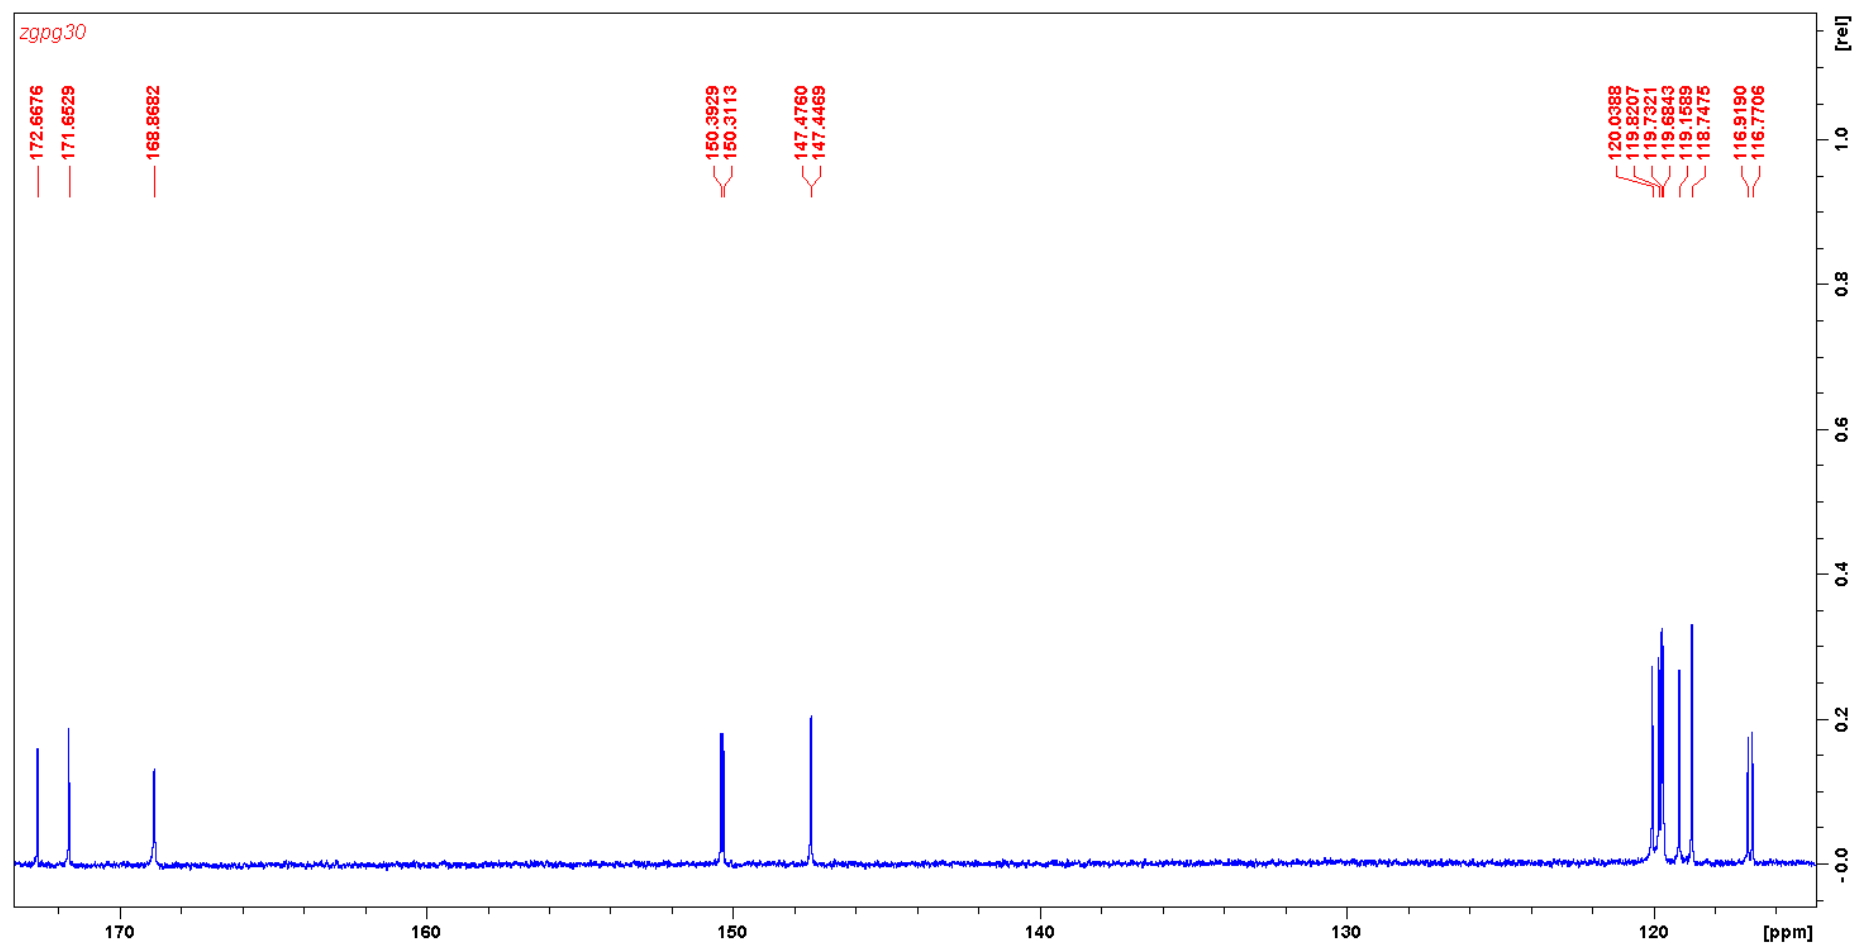

**Figure S32:**  $^{13}\text{C}$  NMR spectrum of compound **2** (expanded).

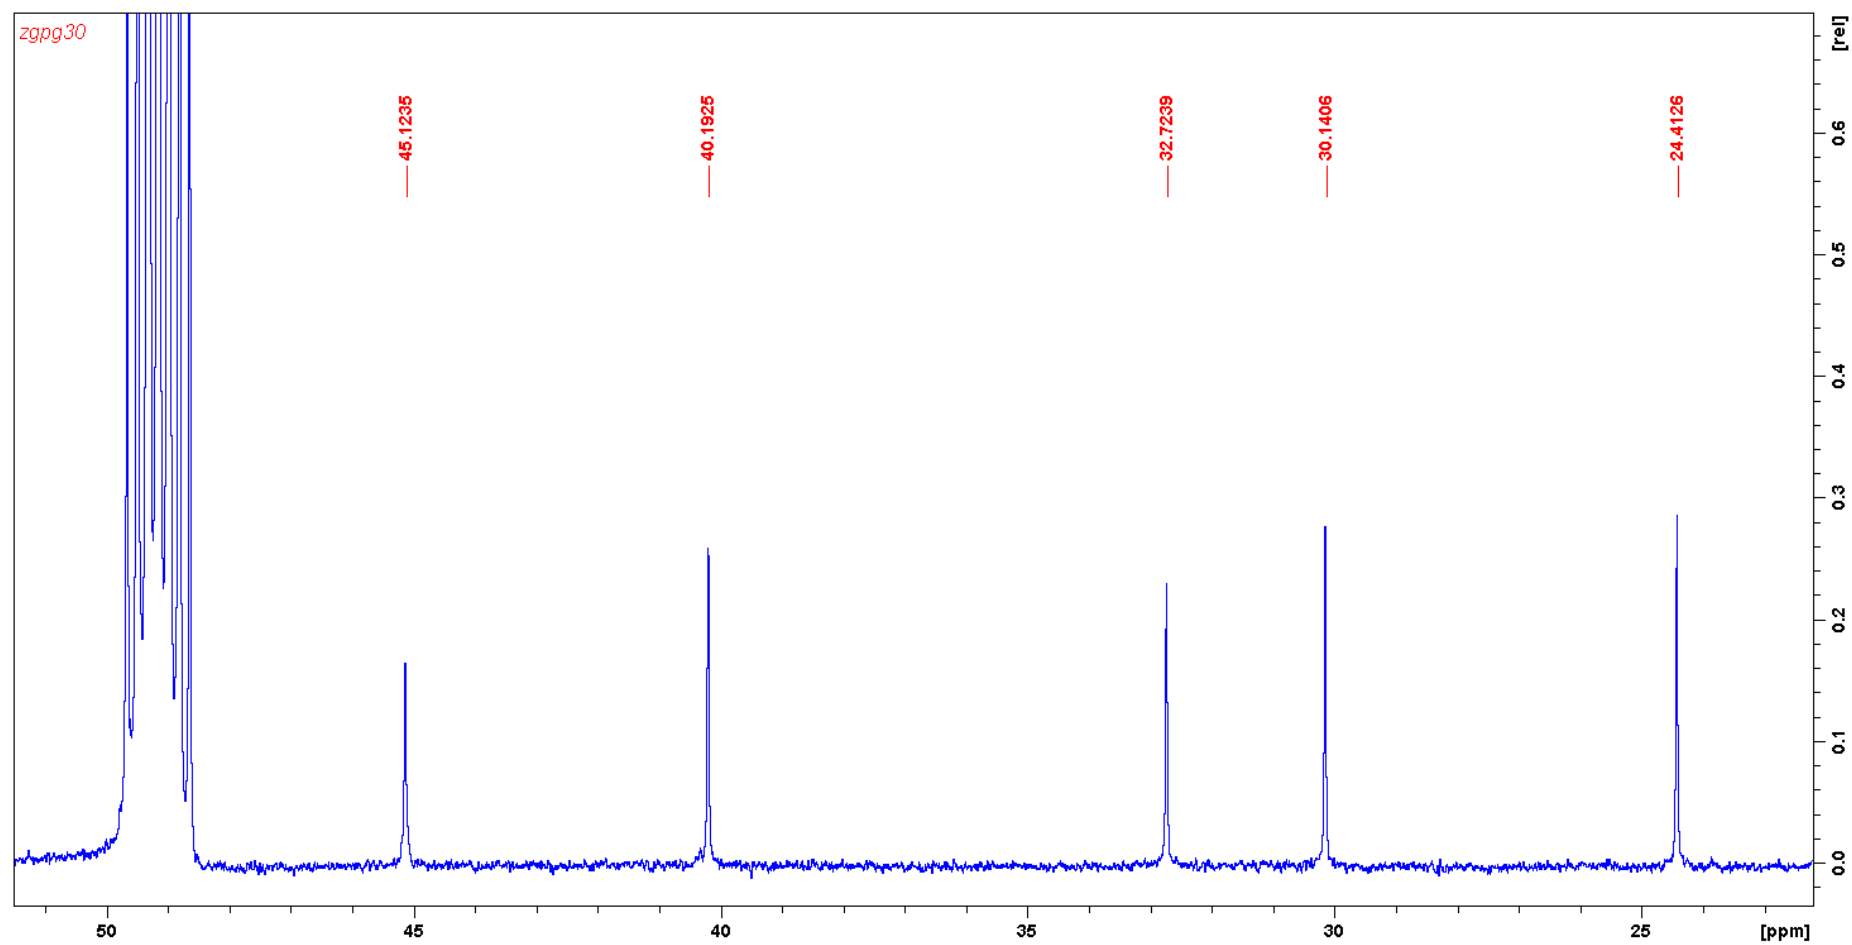

**Figure S33:**  $^{13}\text{C}$  NMR spectrum of compound **2** (expanded).

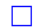

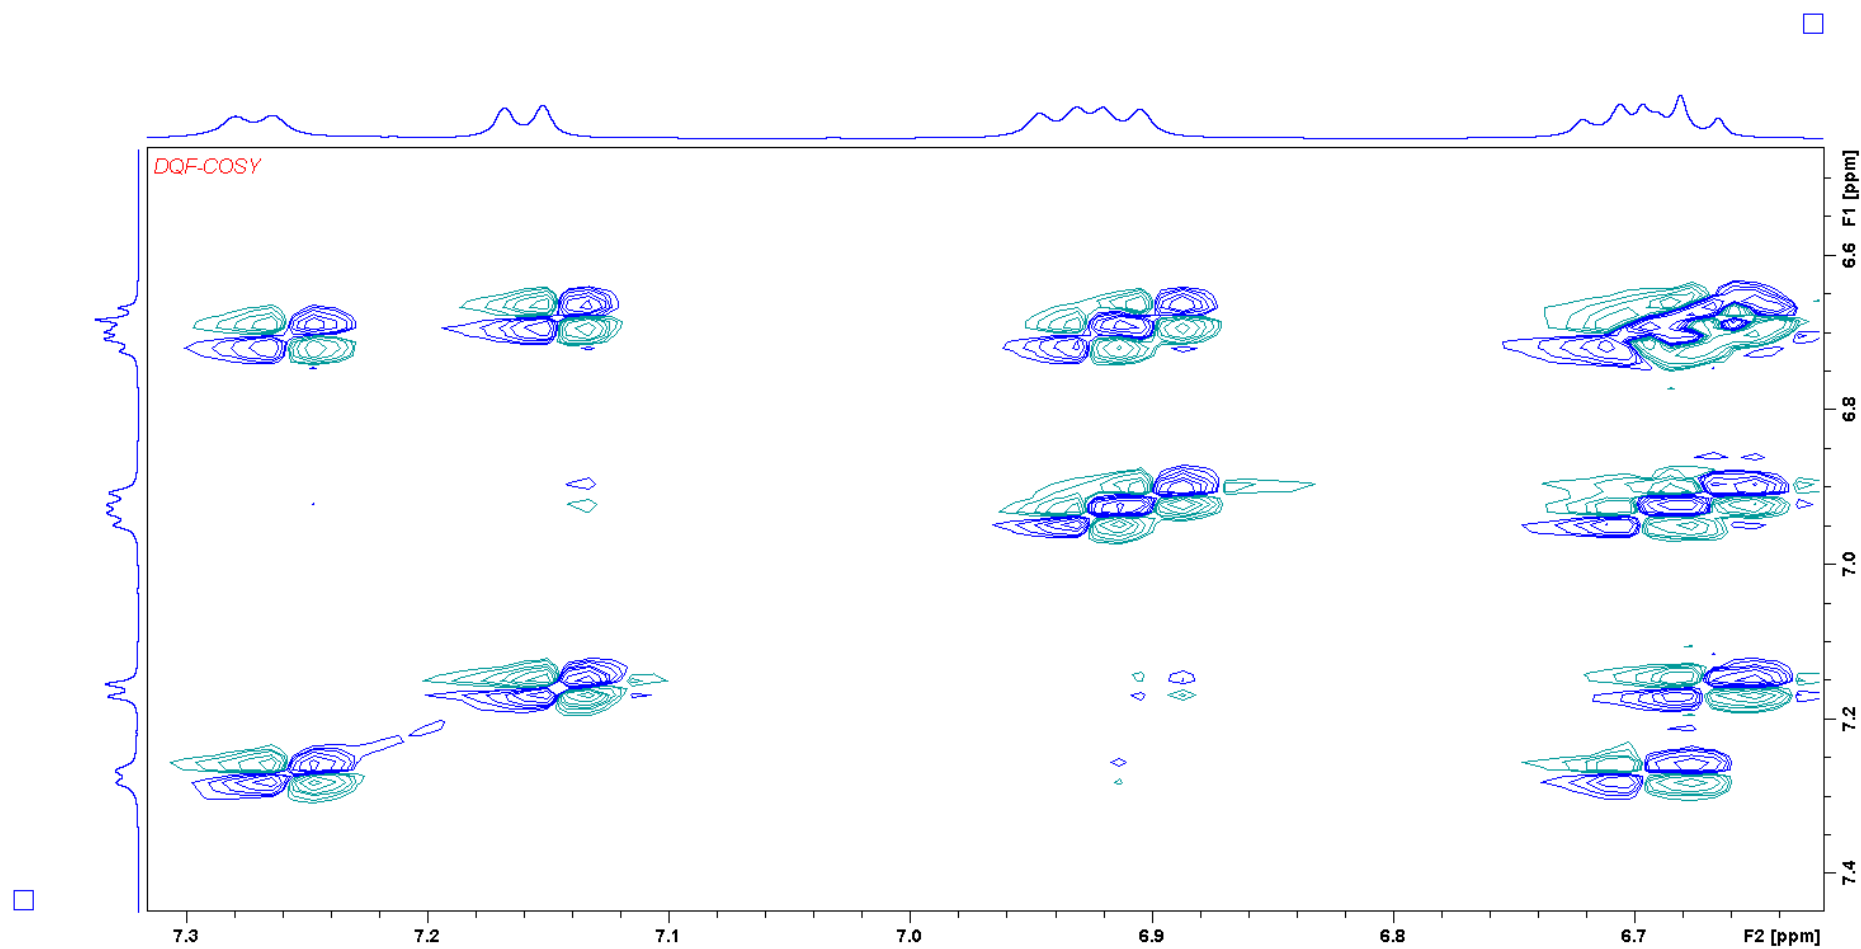

**Figure S35.**  $^1\text{H}$ - $^1\text{H}$  DQF-COSY spectrum of compound 2.

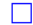

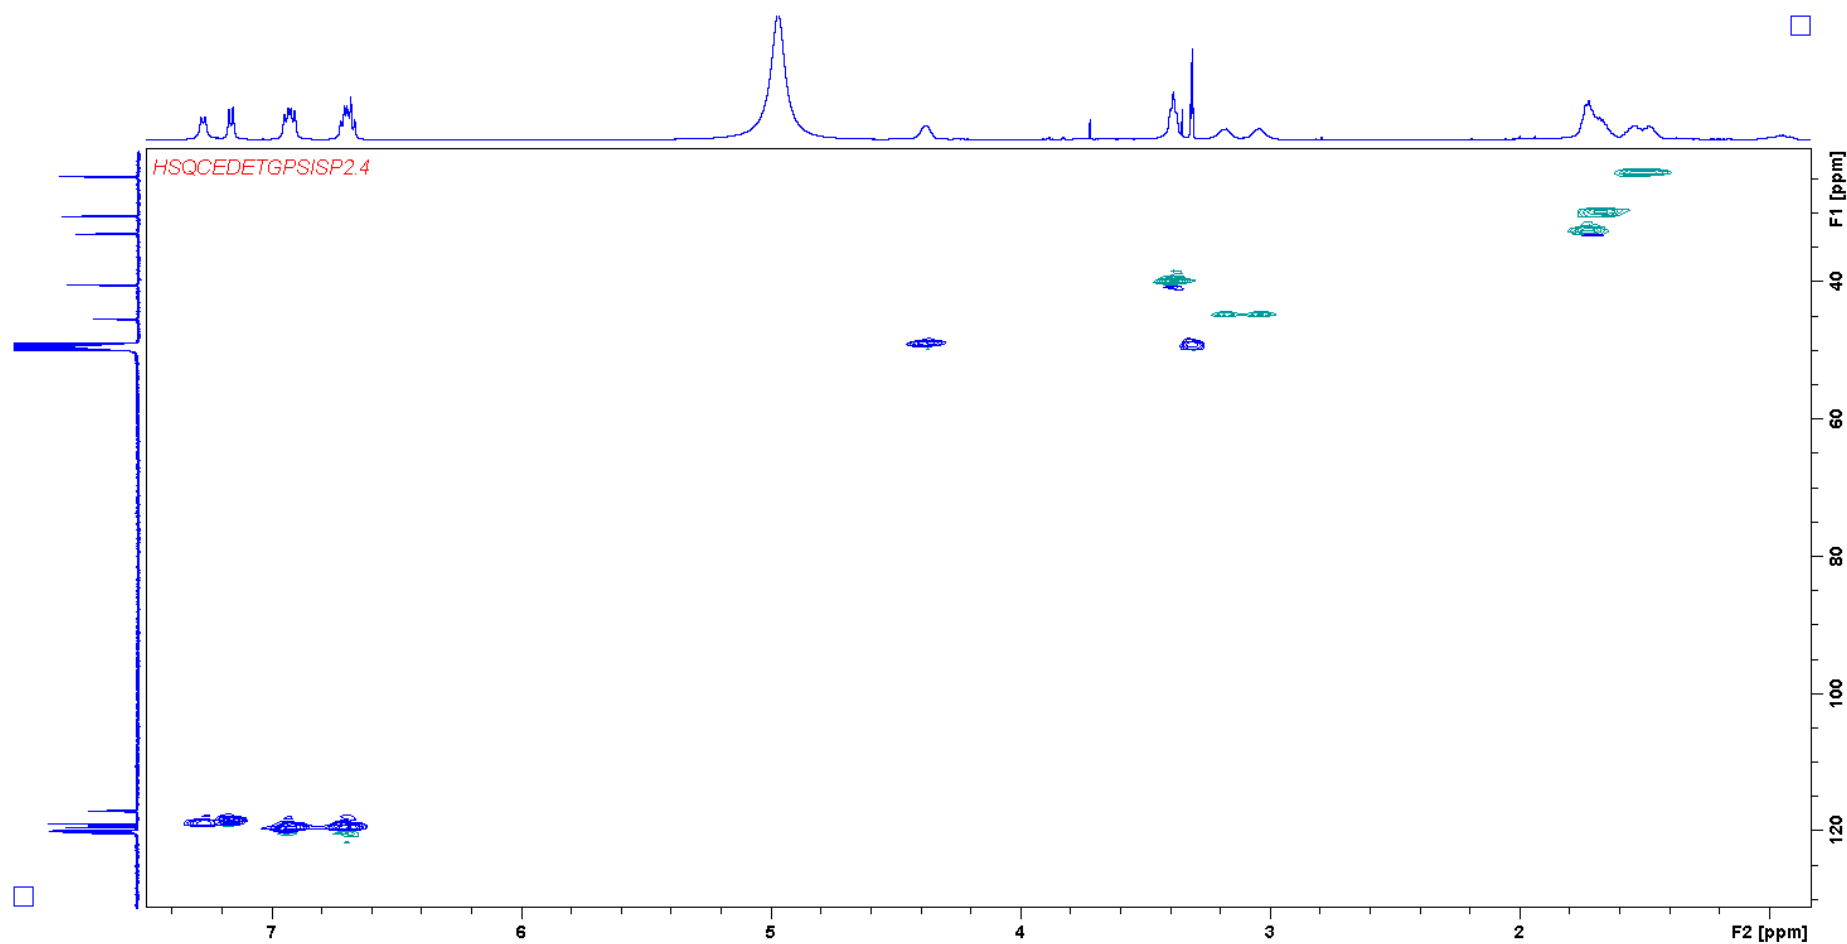

**Figure S37:** HSQC spectrum of compound 2.

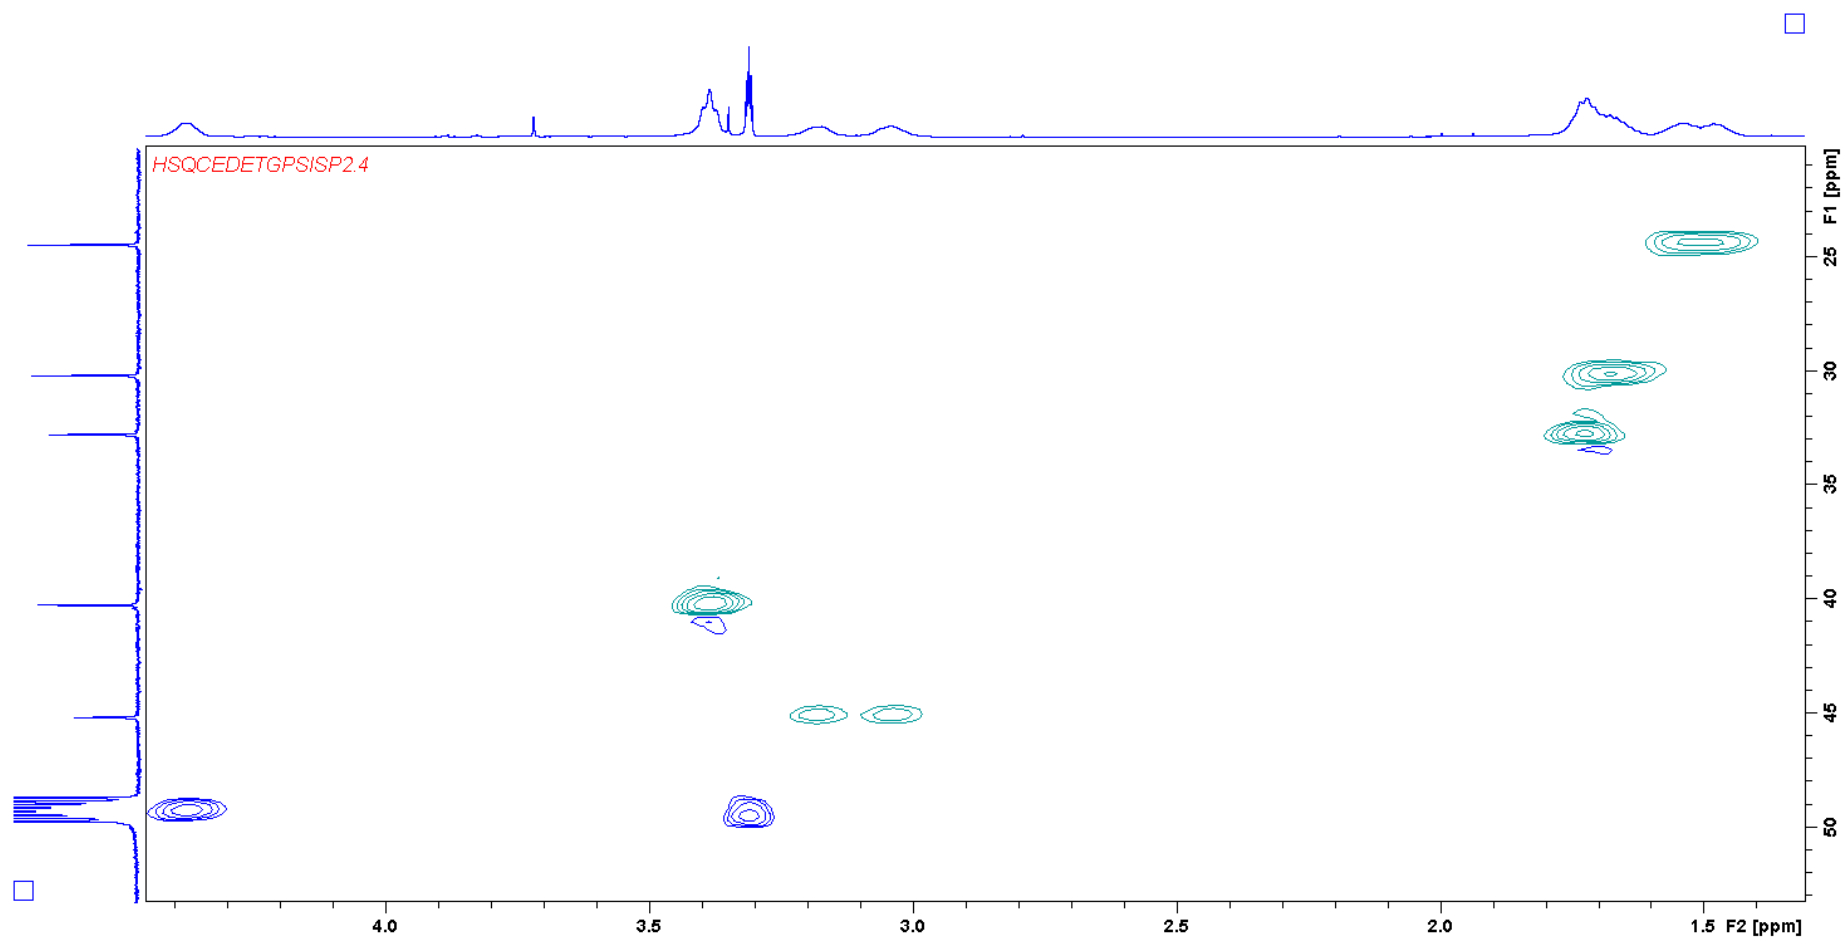

**Figure S38.** HSQC spectrum of compound **2** (expanded).

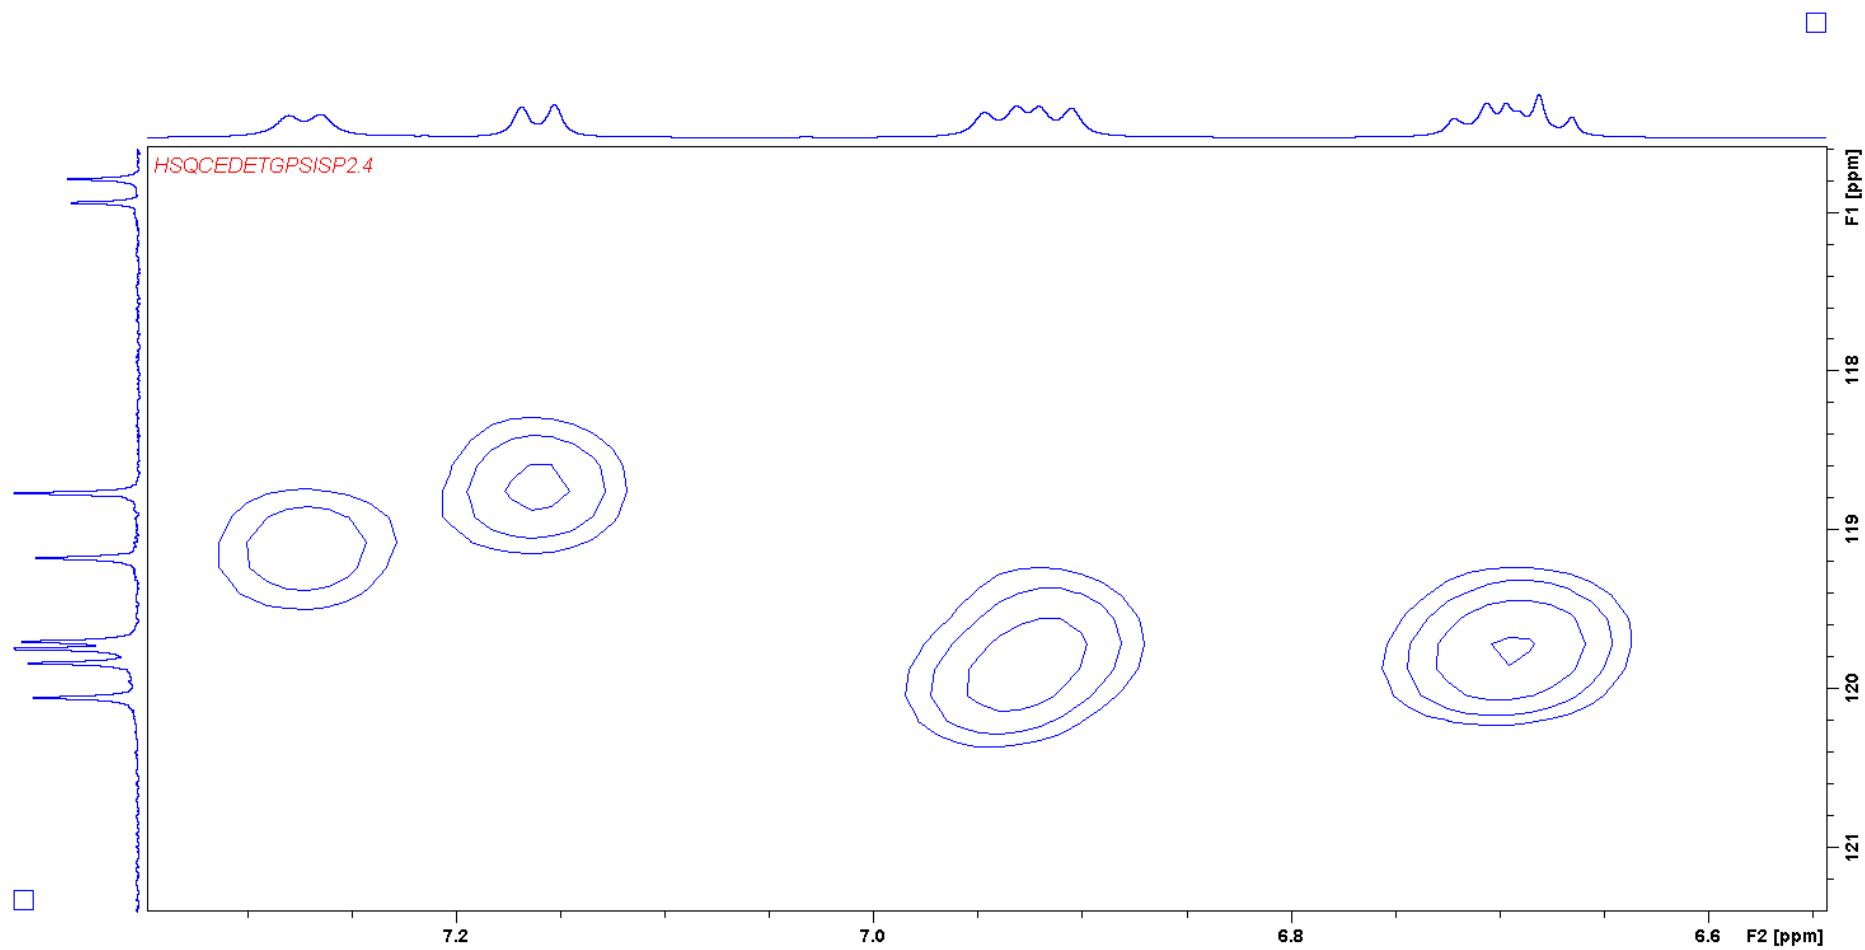

**Figure S39:** HSQC spectrum of compound 2 (expanded).

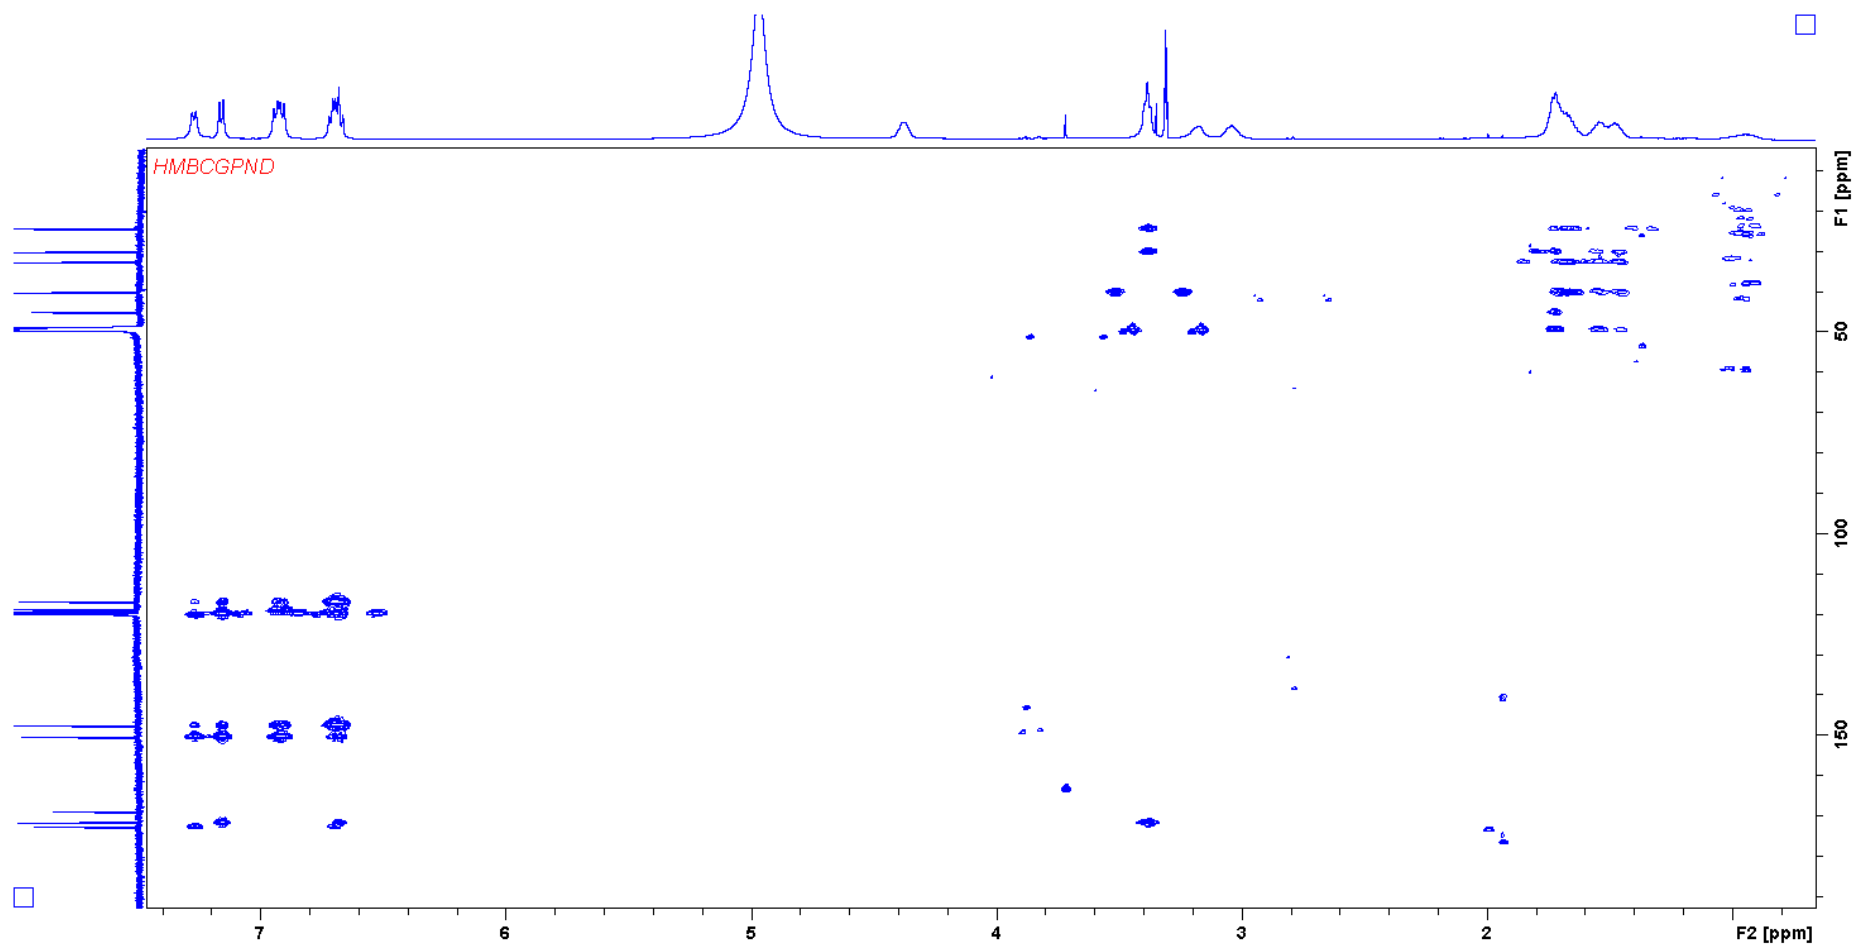

**Figure S40.**  $^1\text{H}$ - $^{13}\text{C}$  HMBC spectrum of compound **2**.

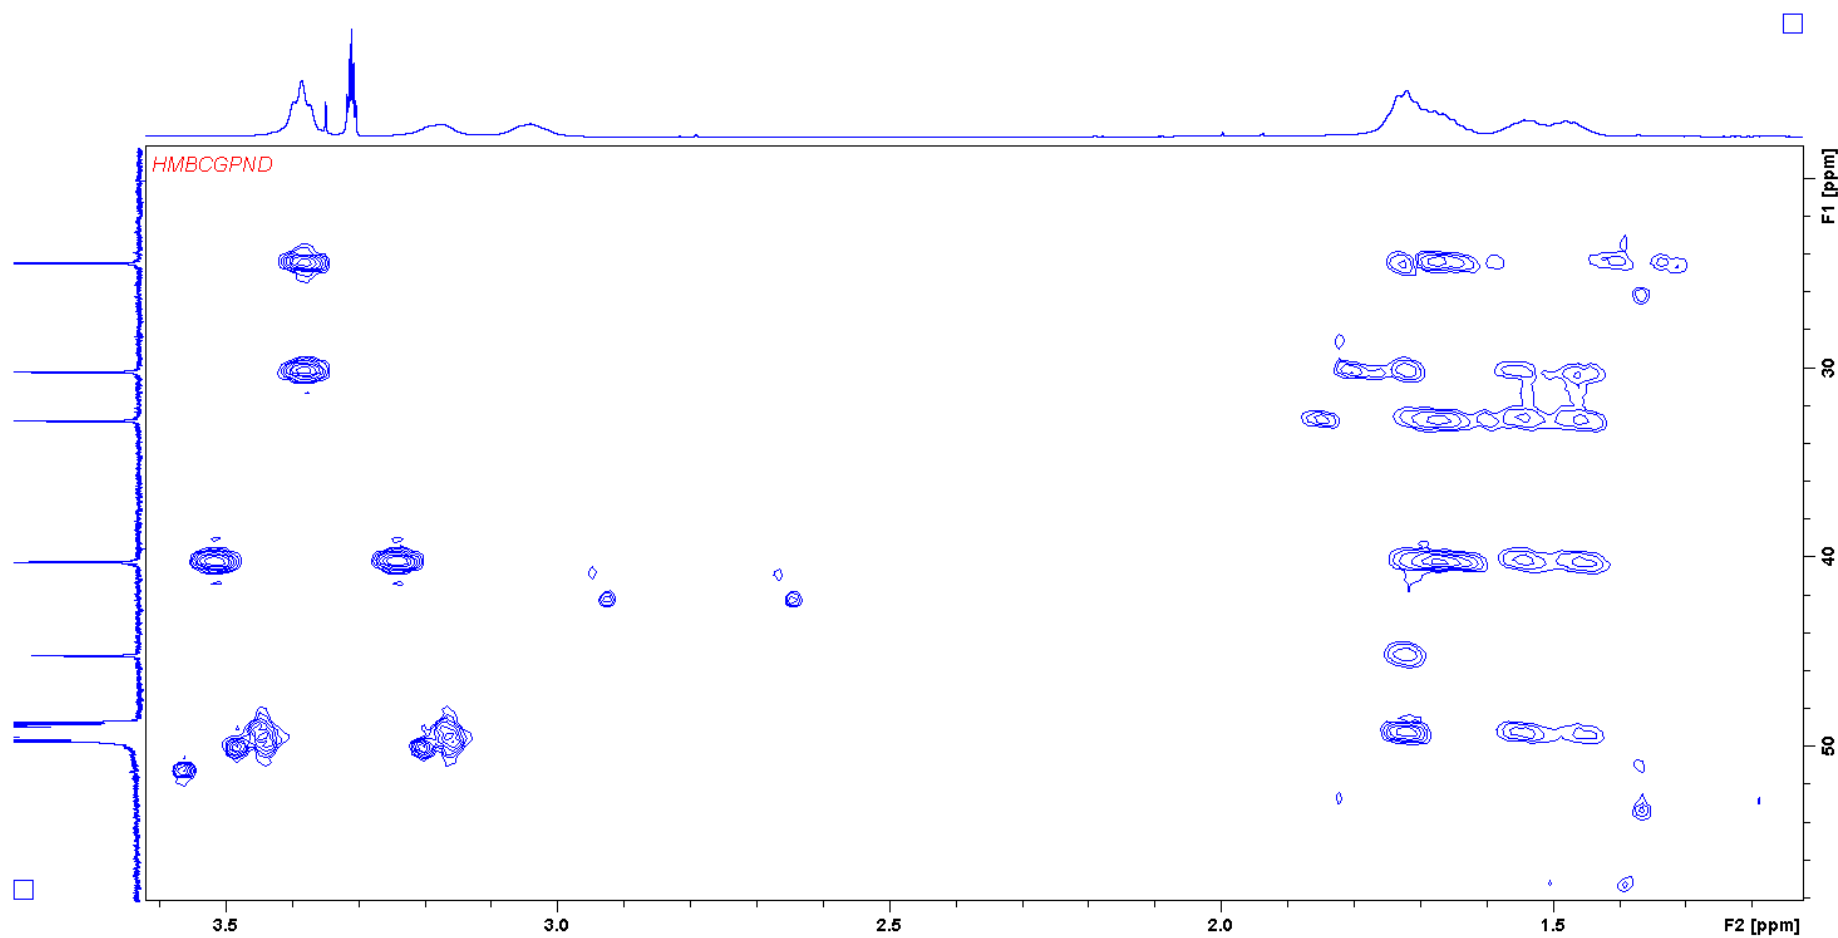

**Figure S41.**  $^1\text{H}$ - $^{13}\text{C}$  spectrum of compound **2** (expanded).

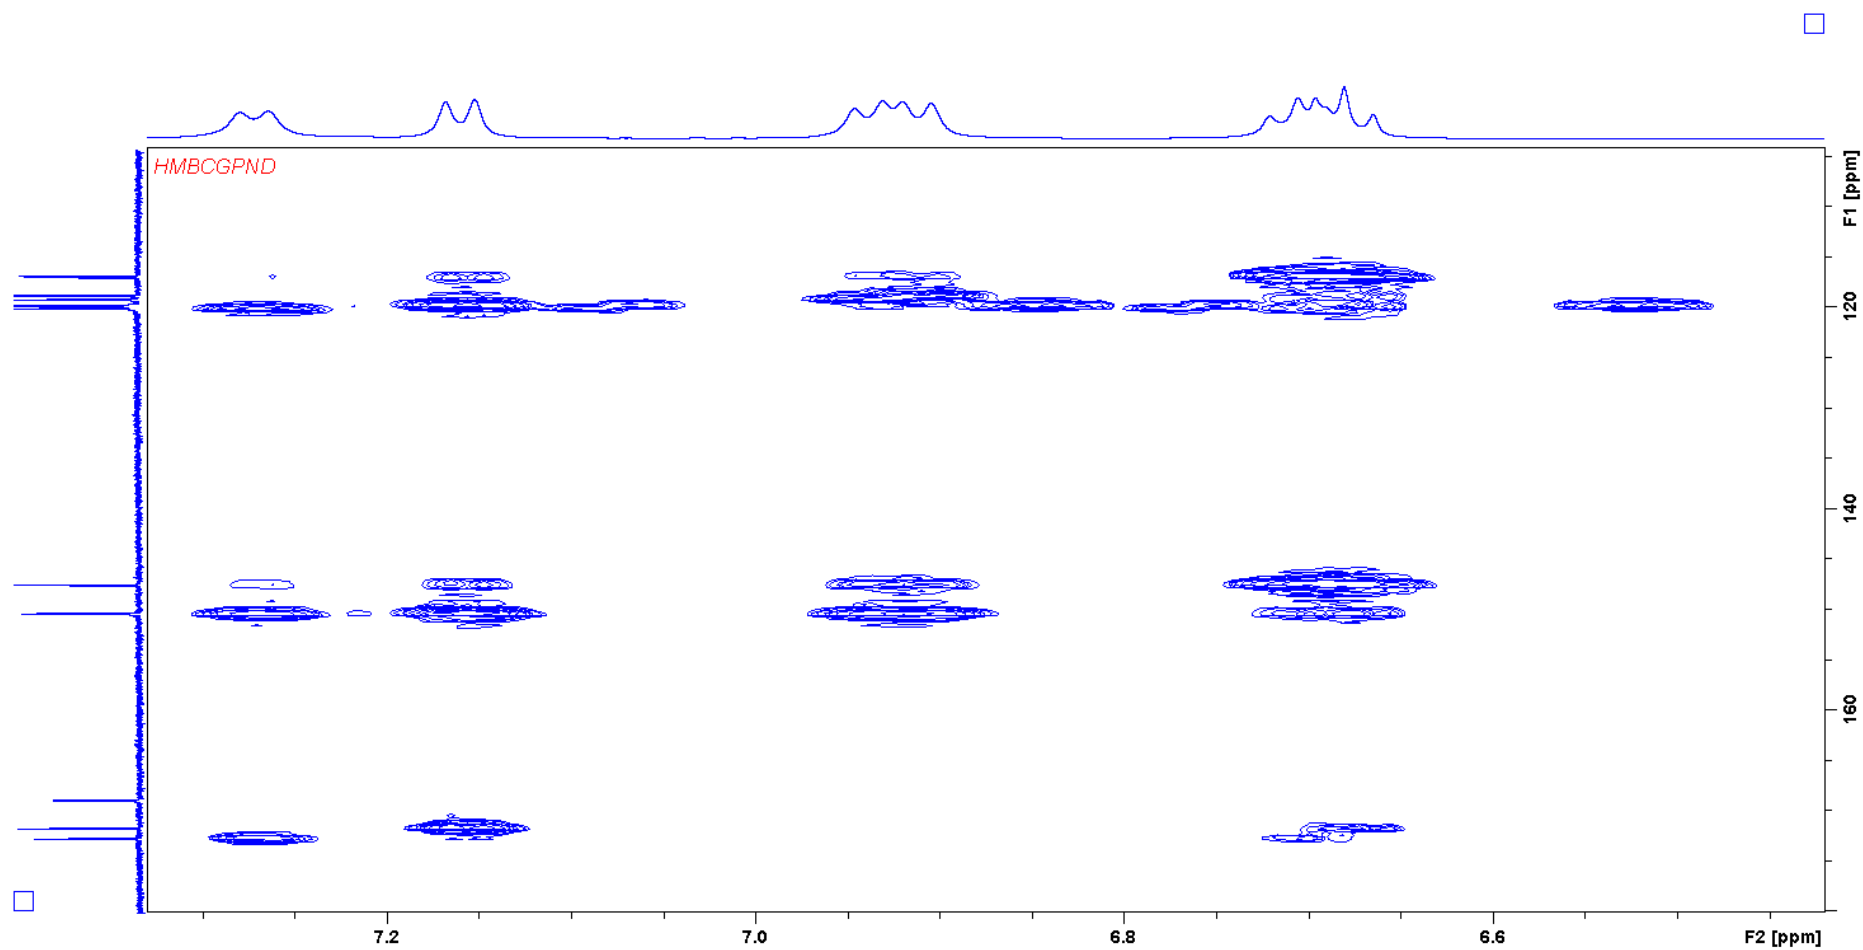

**Figure S42.**  $^1\text{H}$ - $^{13}\text{C}$  HMBC spectrum of compound **2** (expanded).

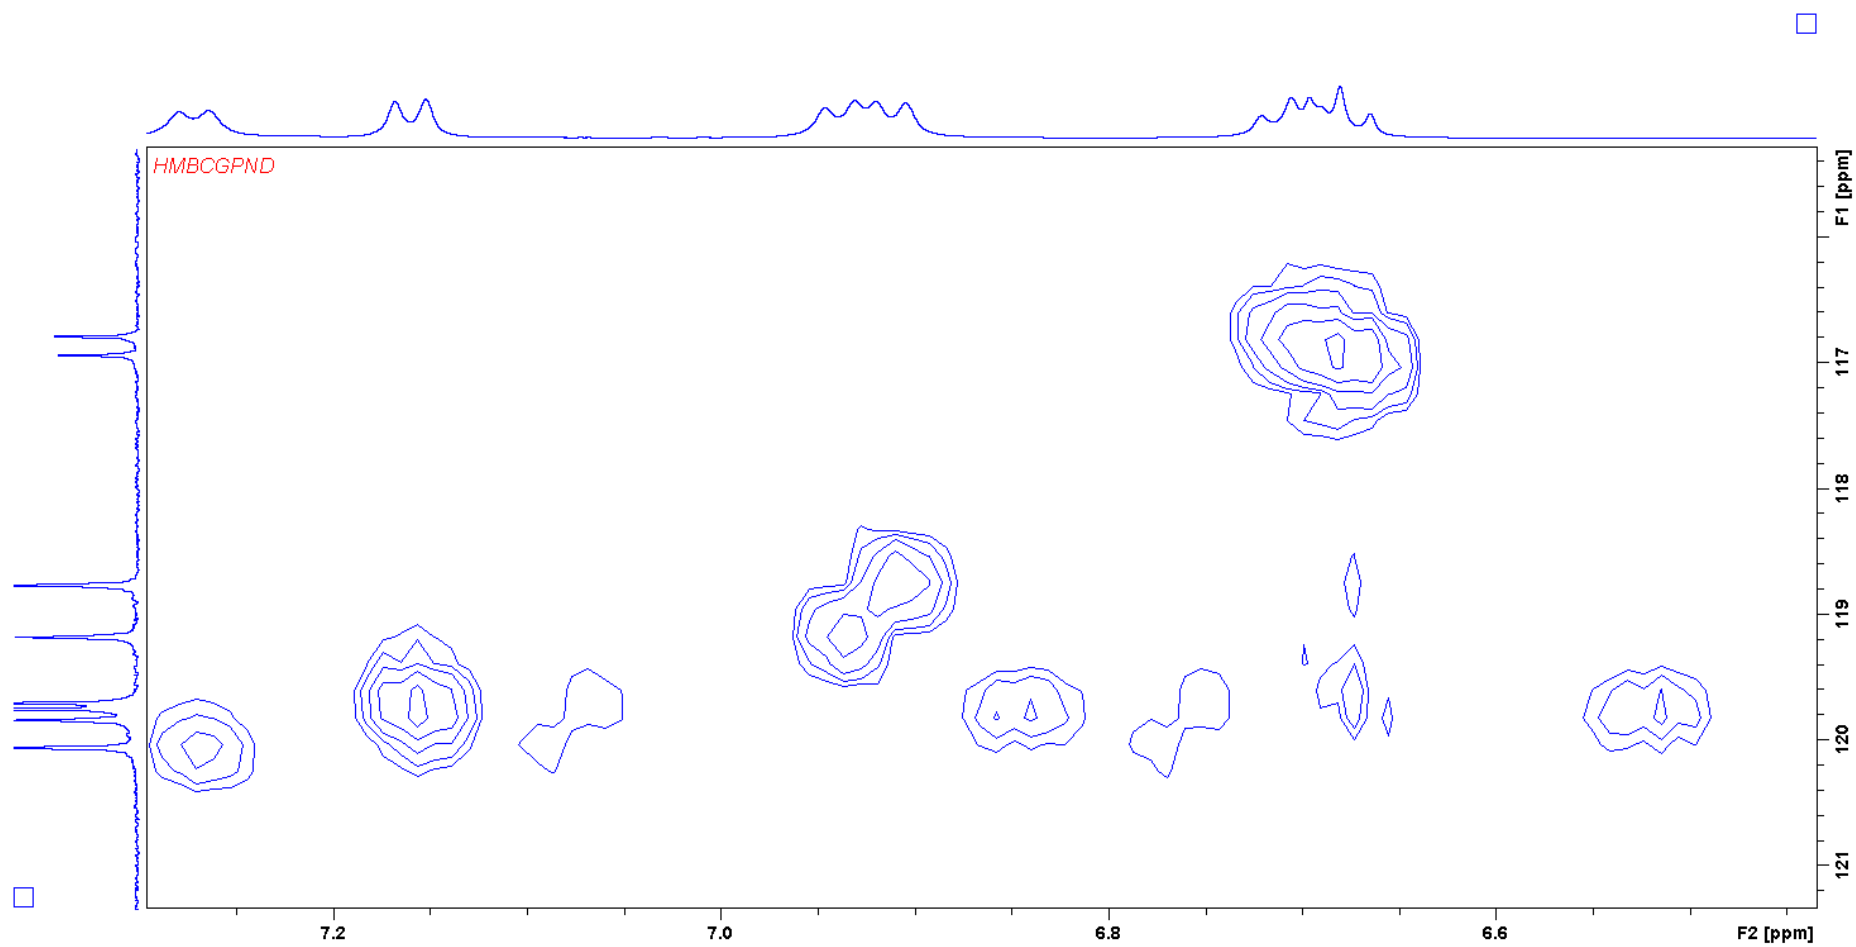

**Figure S43.**  $^1\text{H}$ - $^{13}\text{C}$  HMBC spectrum of compound **2** (expanded).

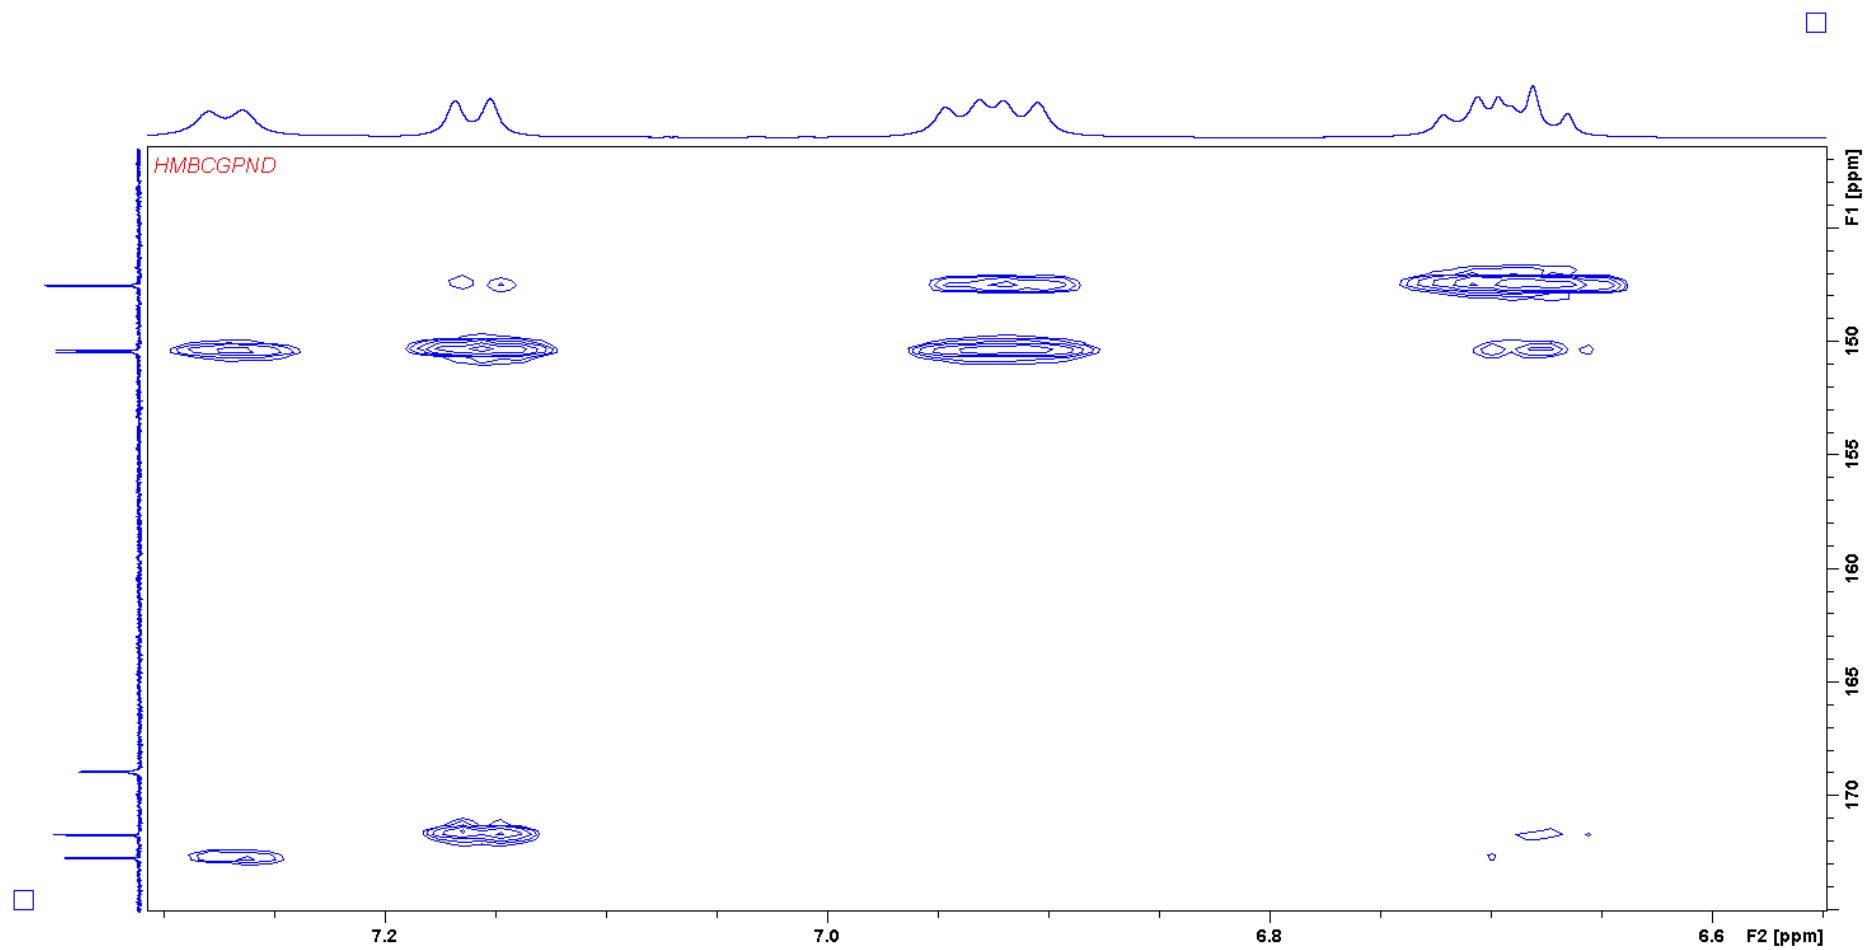

**Figure S44.**  $^1\text{H}$ - $^{13}\text{C}$  HMBC spectrum of compound **2** (expanded).

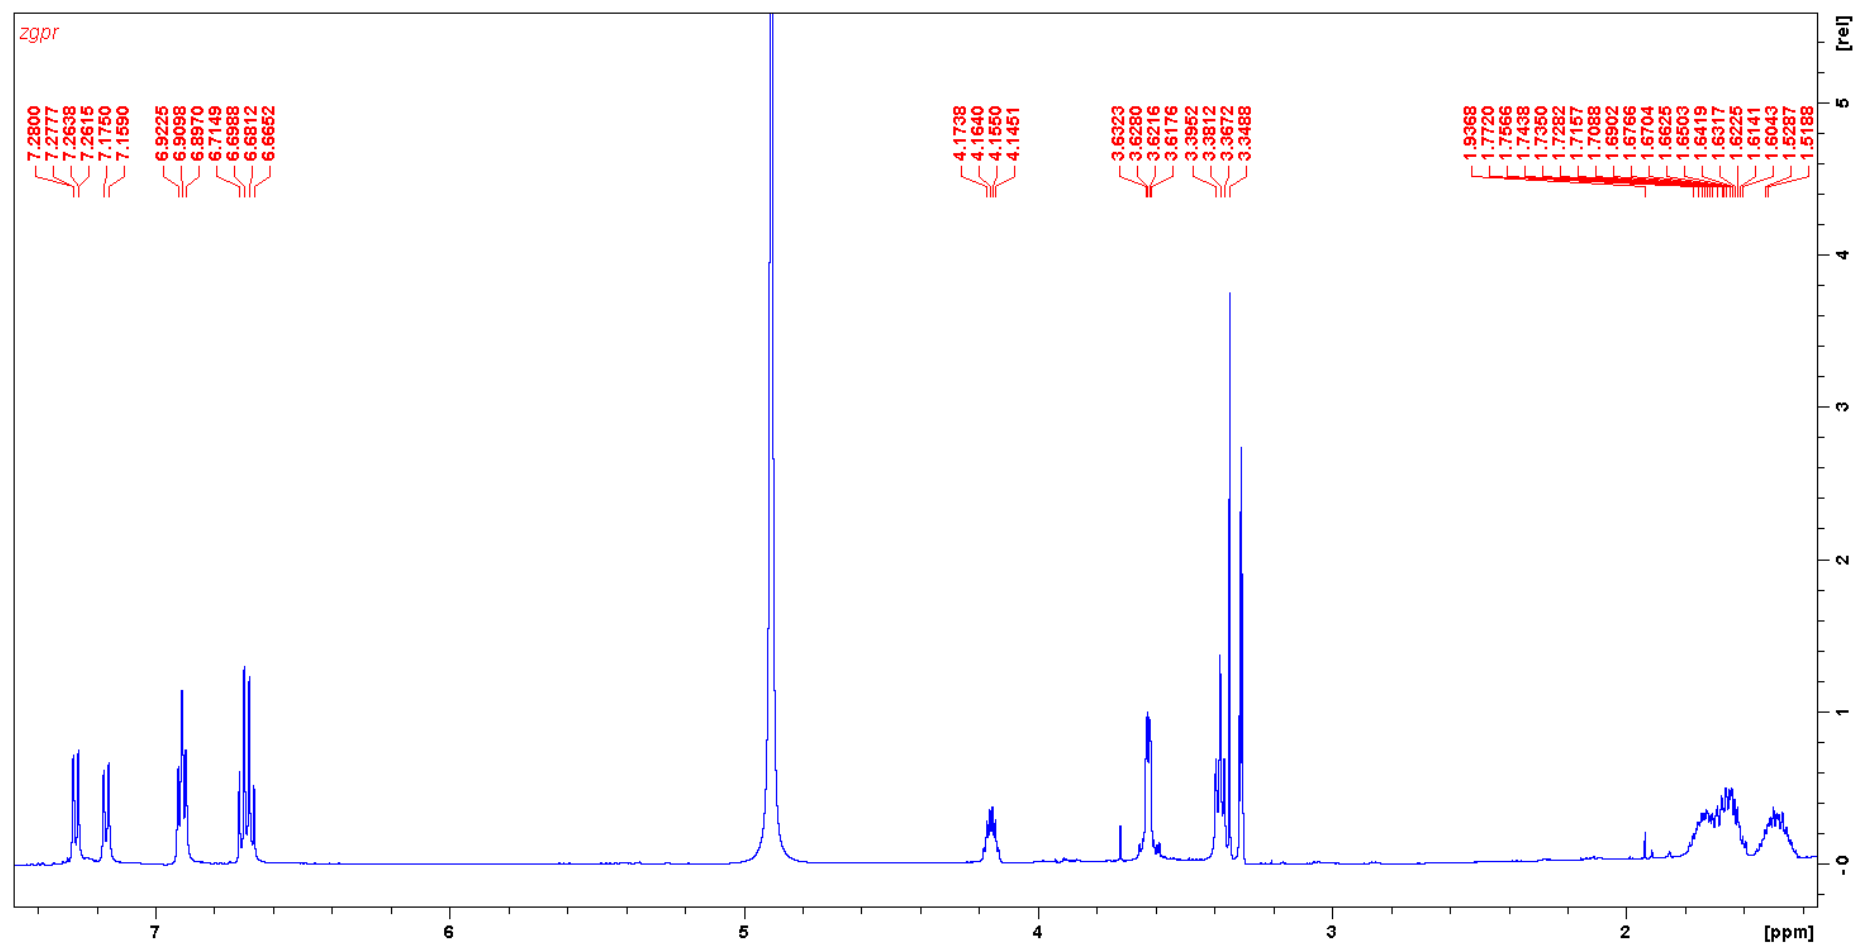

**Figure S45:**  $^1\text{H}$  NMR spectrum of compound **3**.

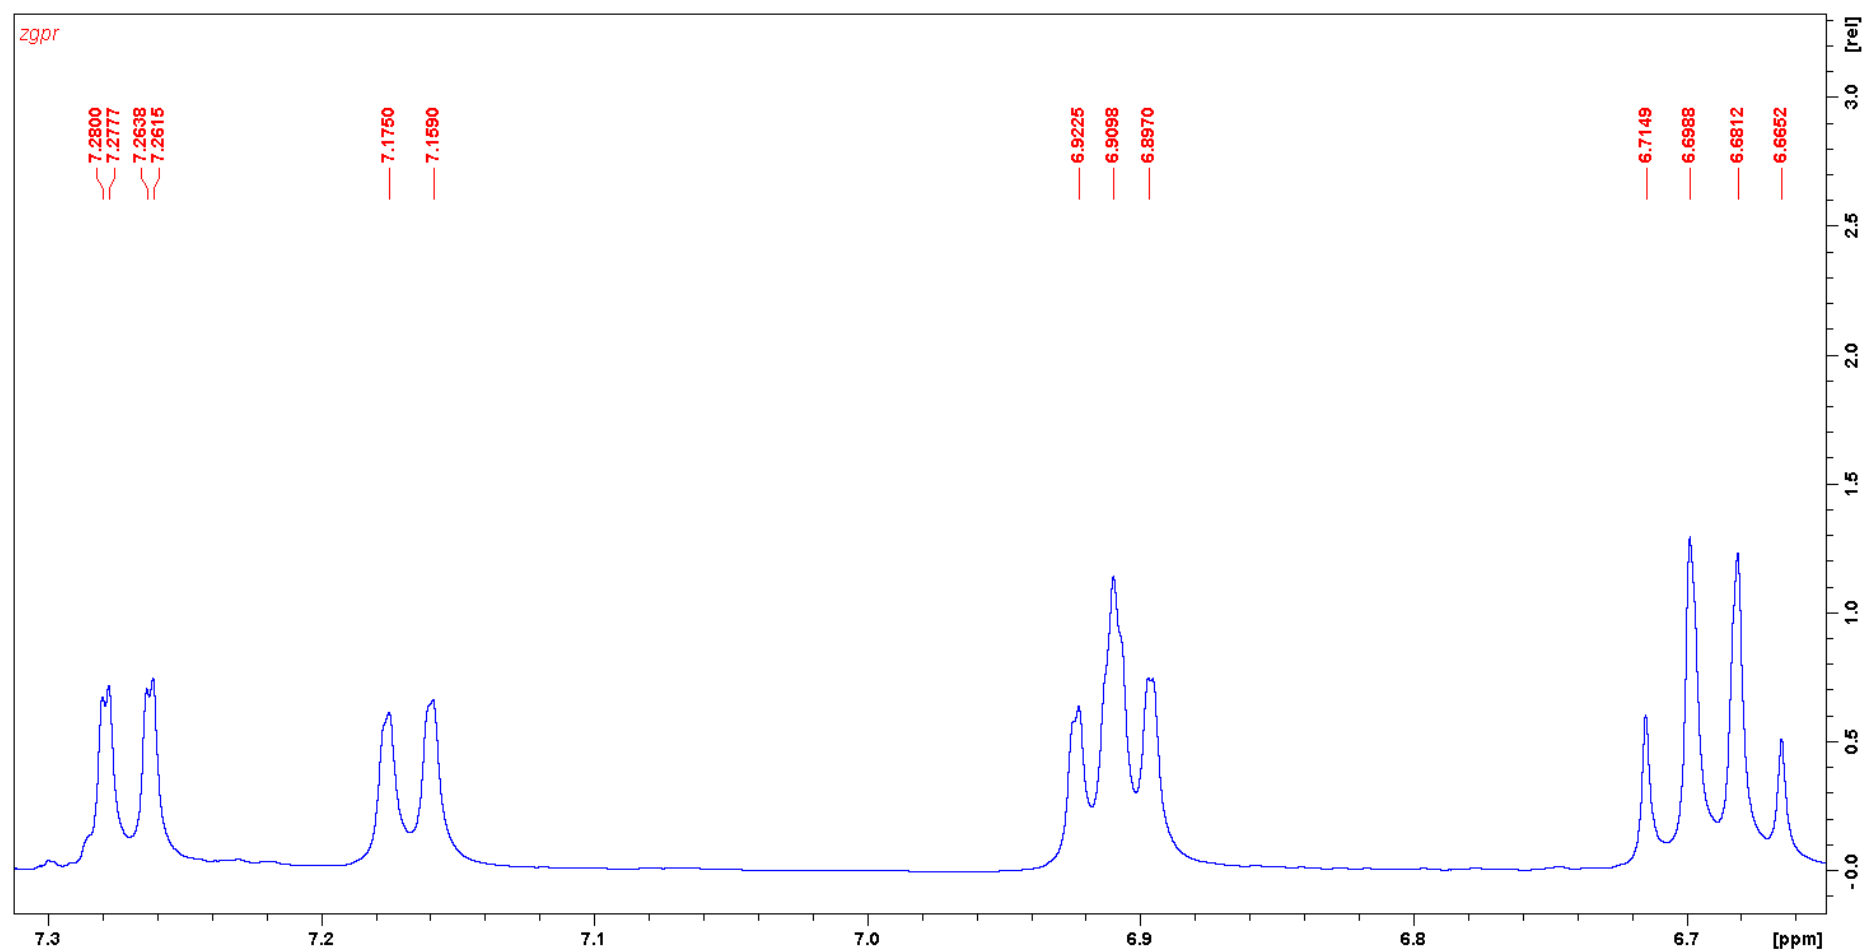

**Figure S46.**  $^1\text{H}$  NMR spectrum of compound **3** (expanded).

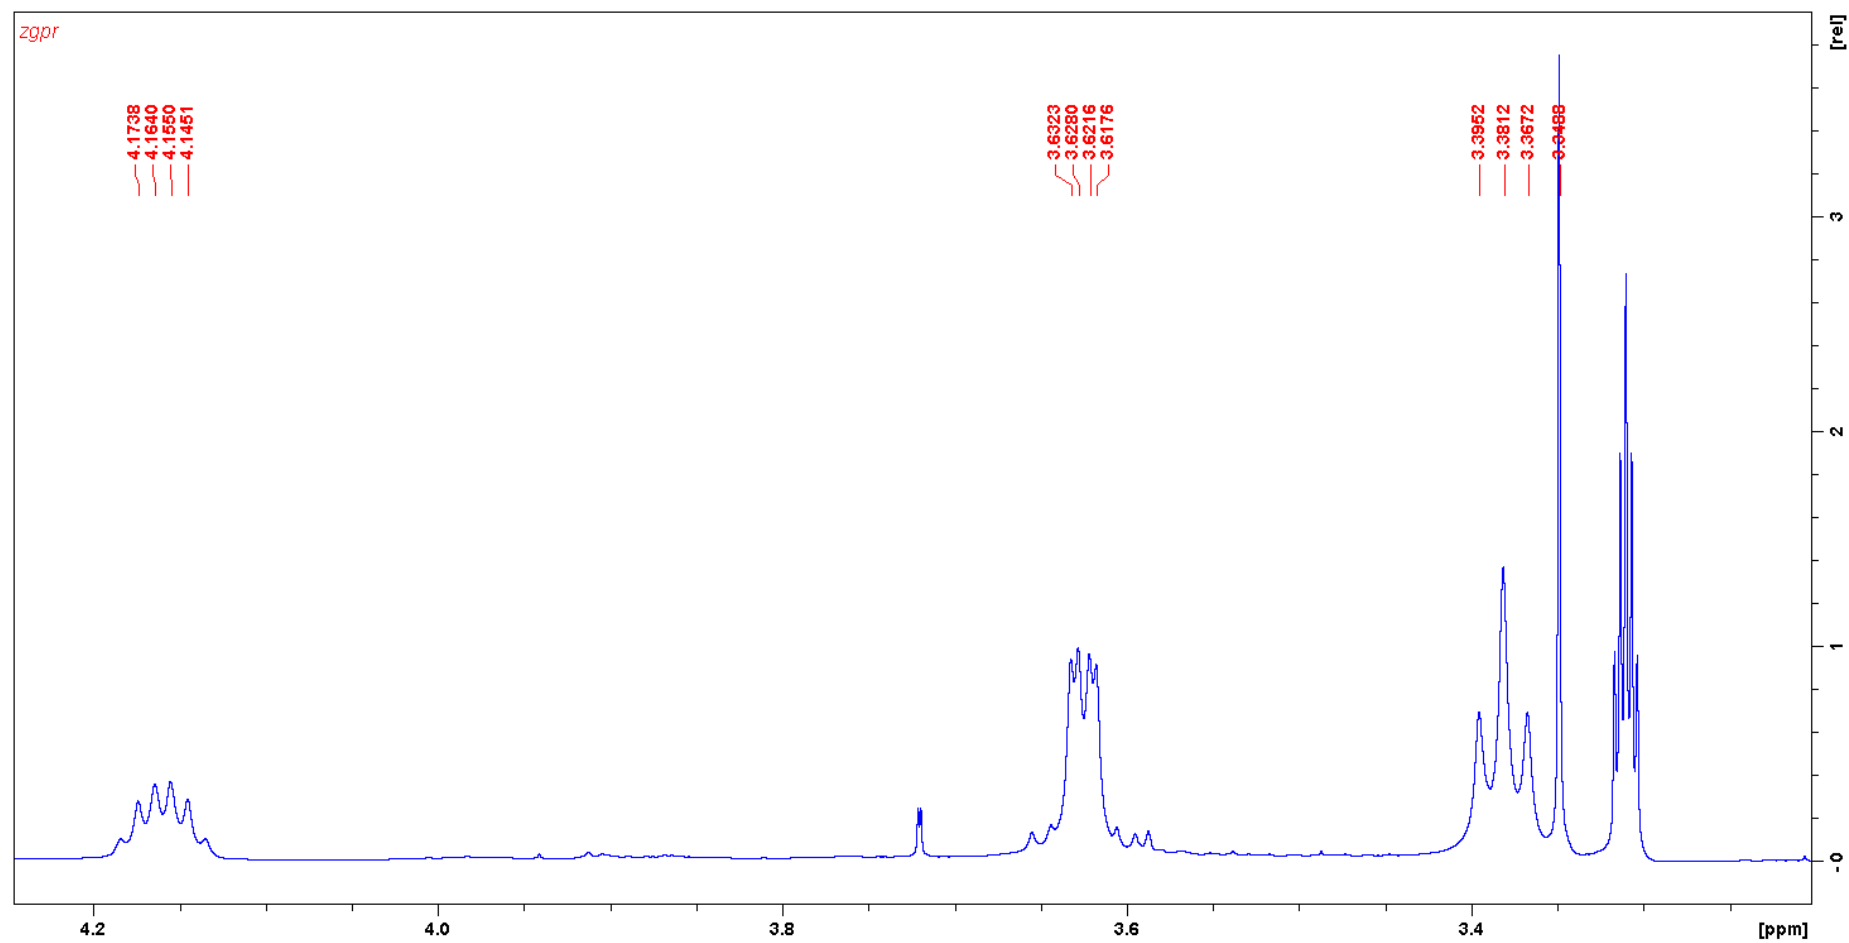

**Figure S47.**  $^1\text{H}$  NMR spectrum of compound **3** (expanded).

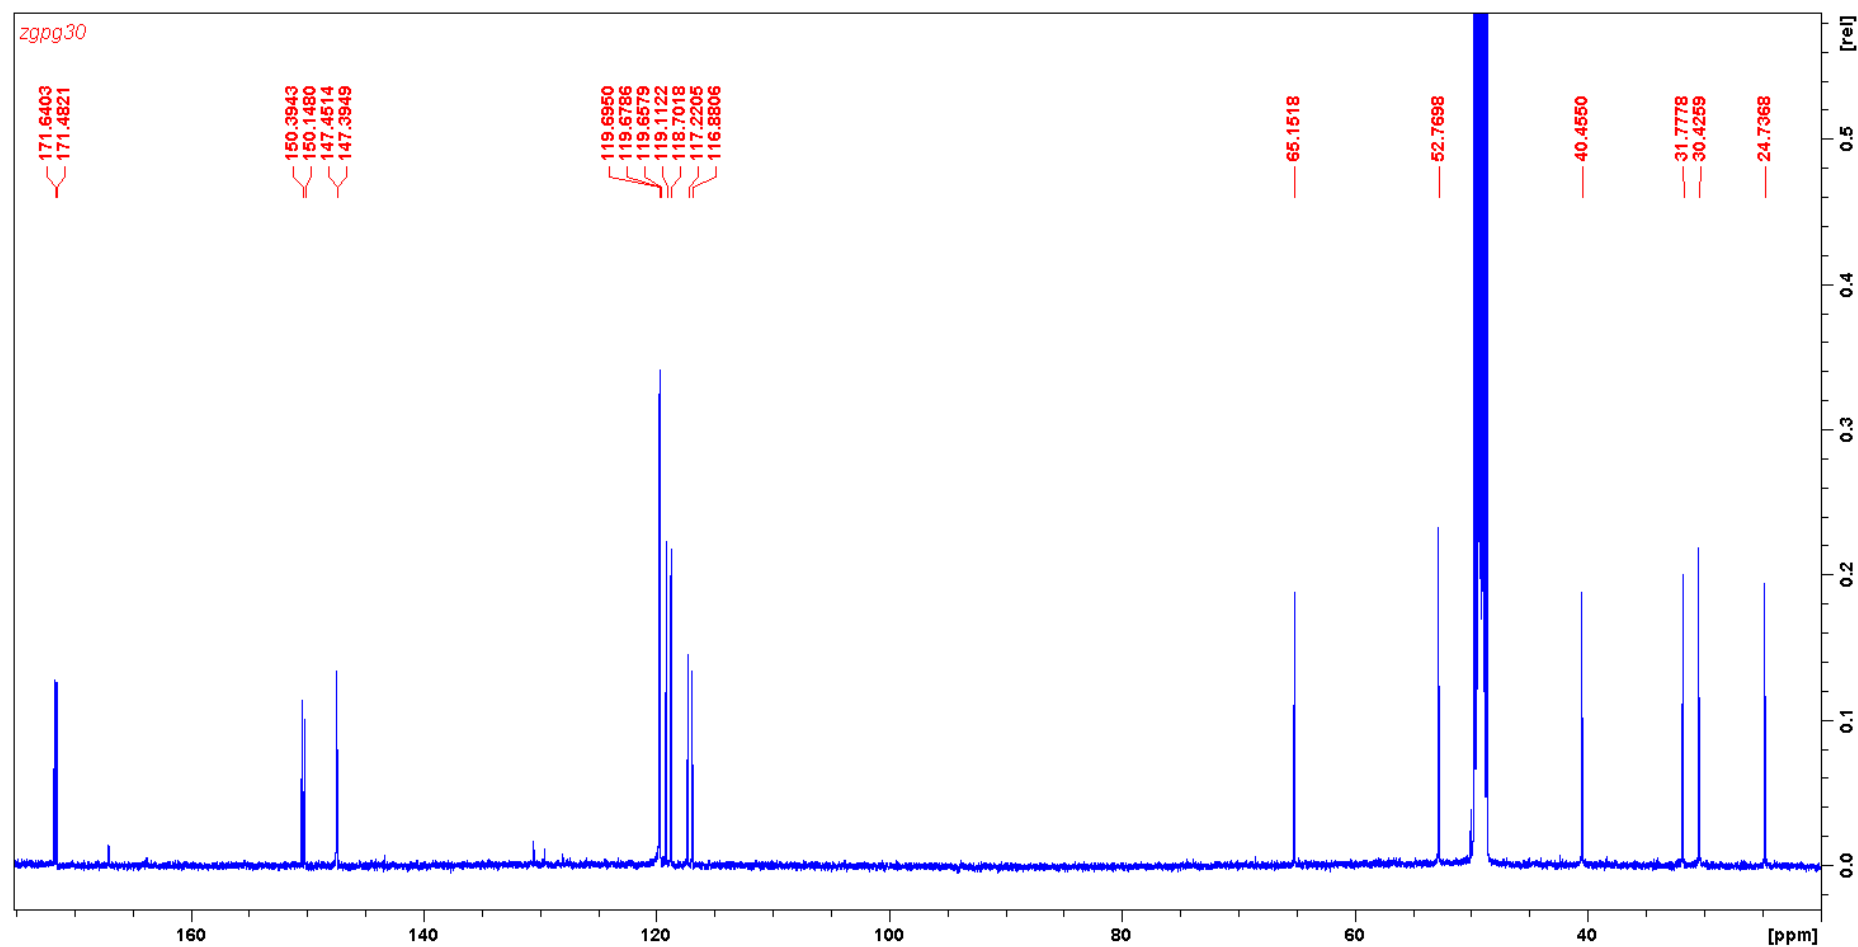

**Figure S48.**  $^{13}\text{C}$  NMR spectrum of compound 3.

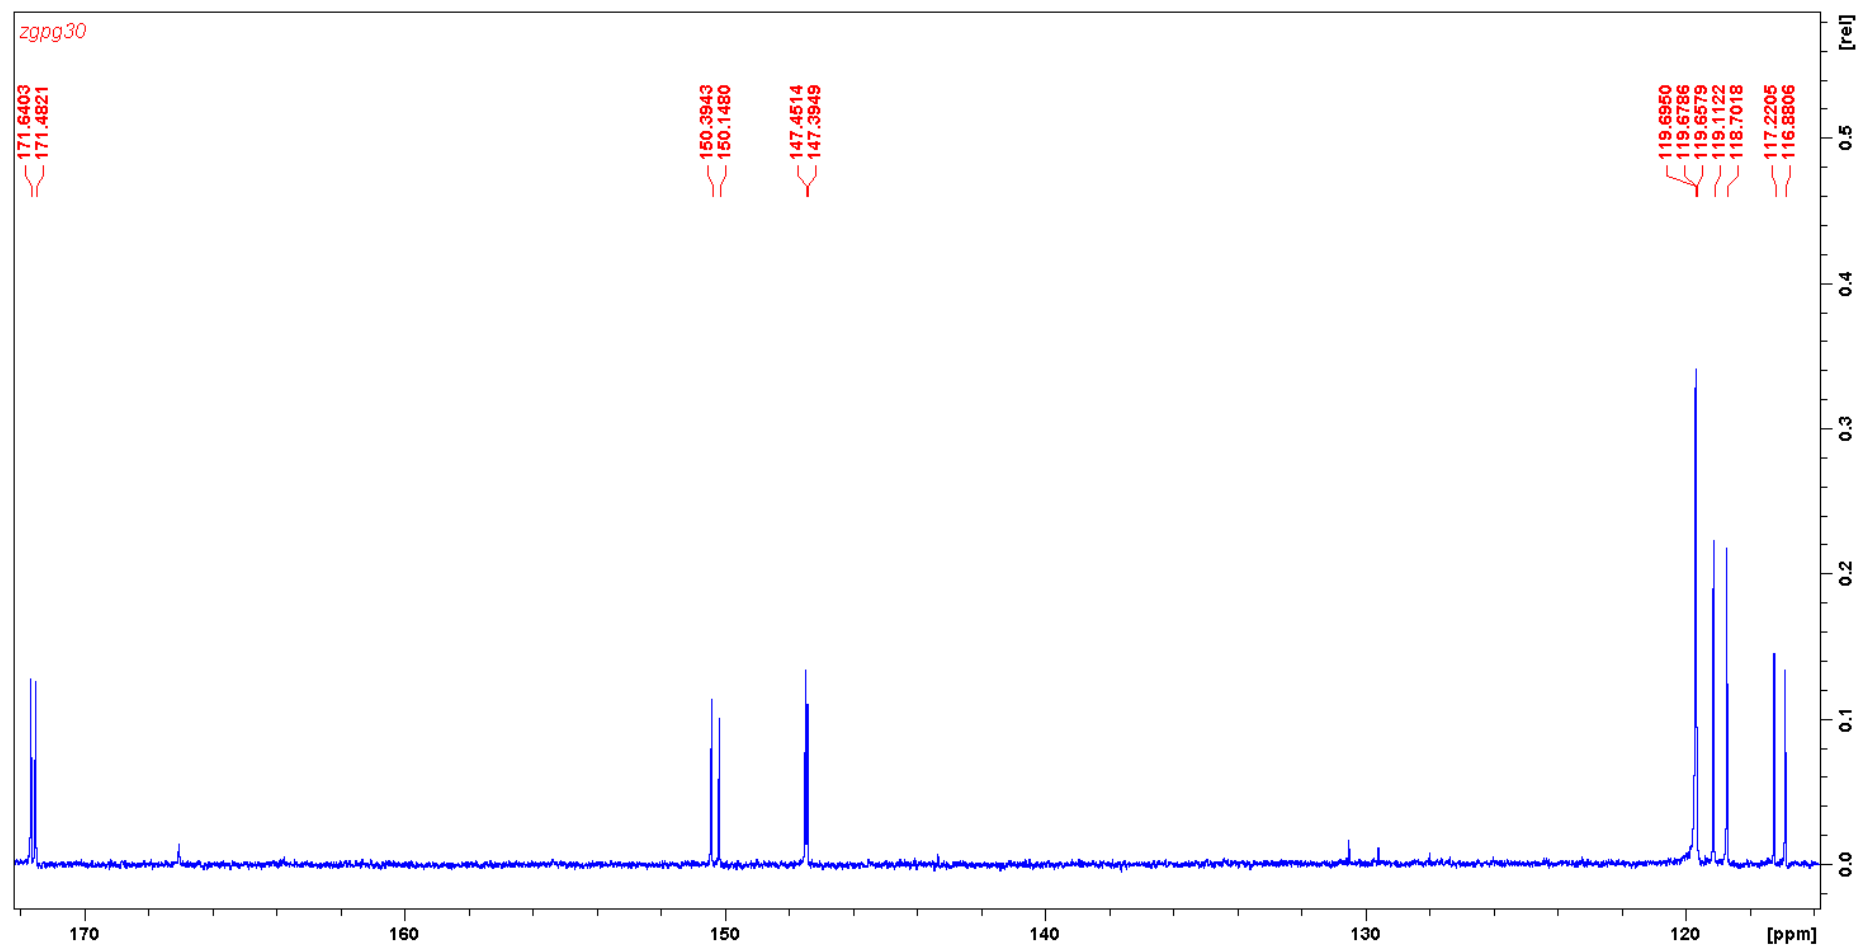

**Figure S49.**  $^{13}\text{C}$  NMR spectrum of compound **3** (expanded).

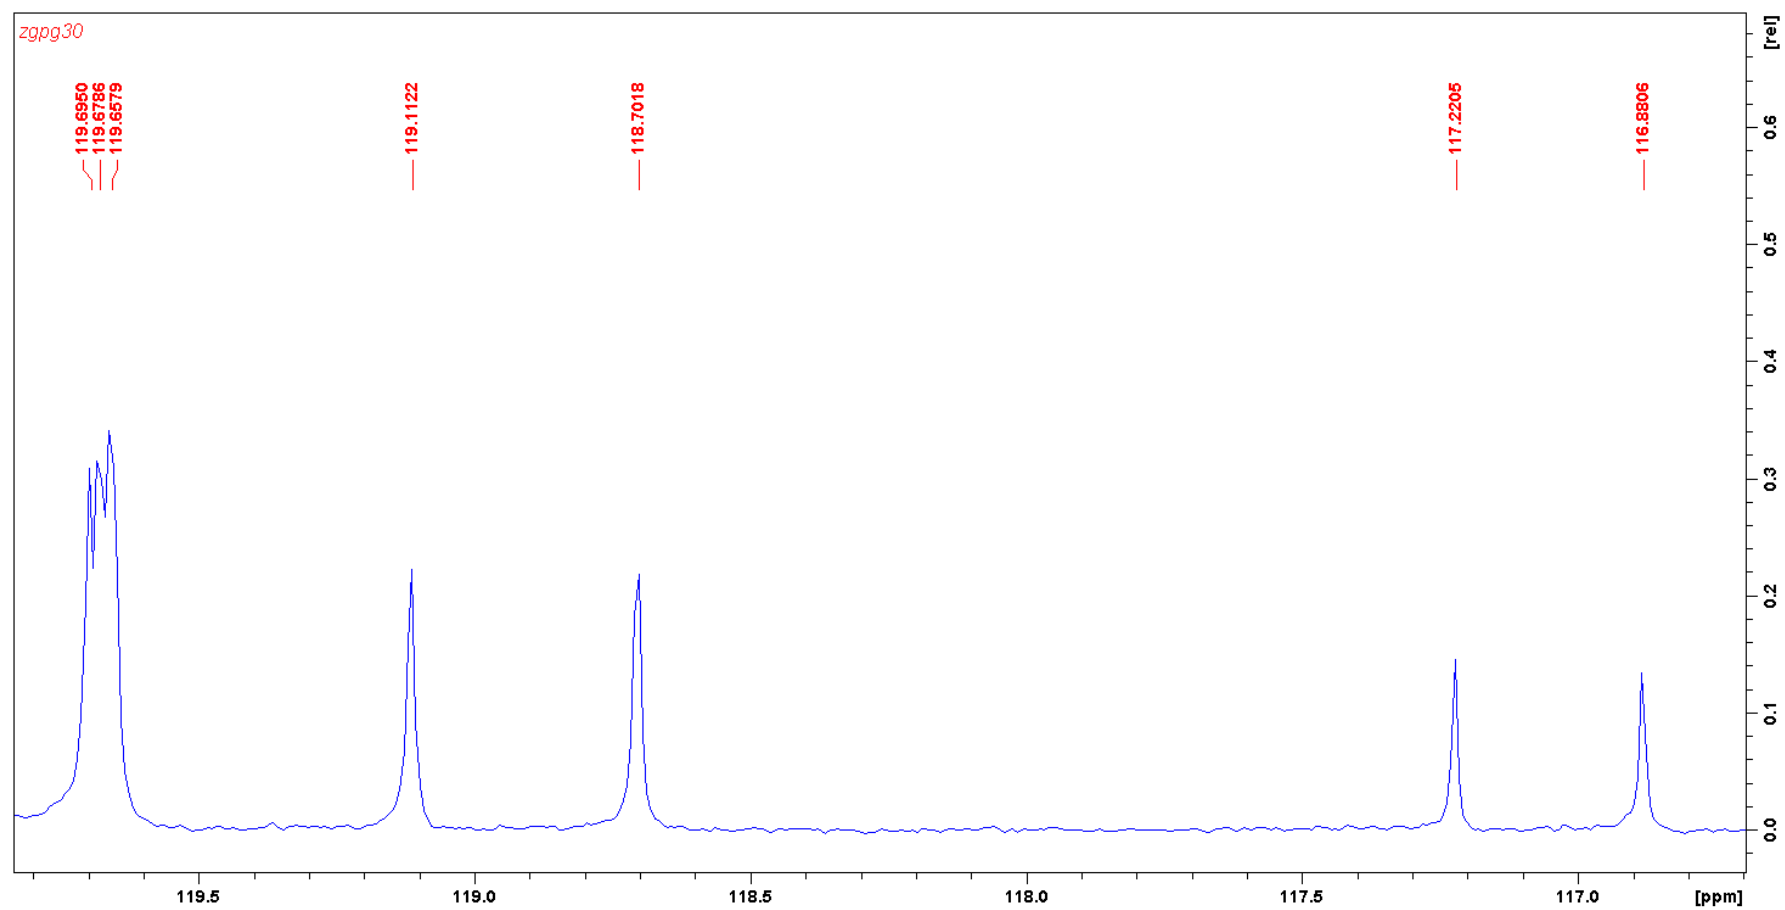

**Figure S50.**  $^{13}\text{C}$  NMR spectrum of compound **3**.

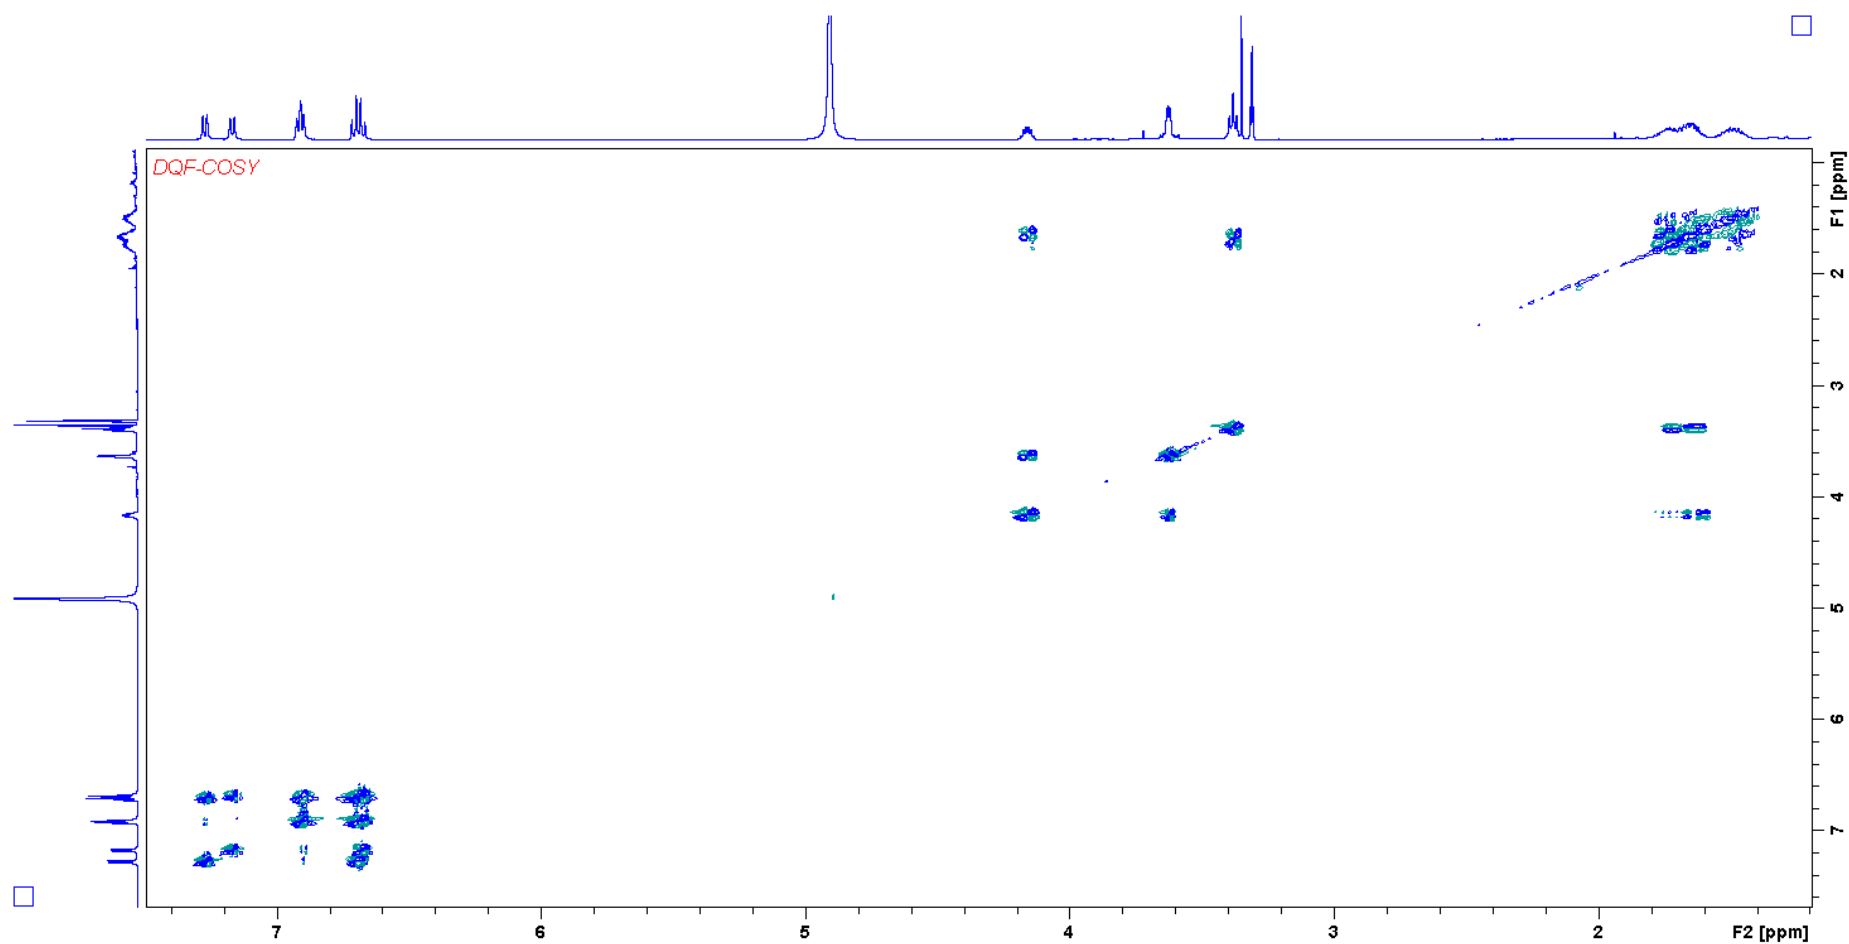

**Figure S51:**  $^1\text{H}$ - $^1\text{H}$  DQF-COSY spectrum of compound **3**.

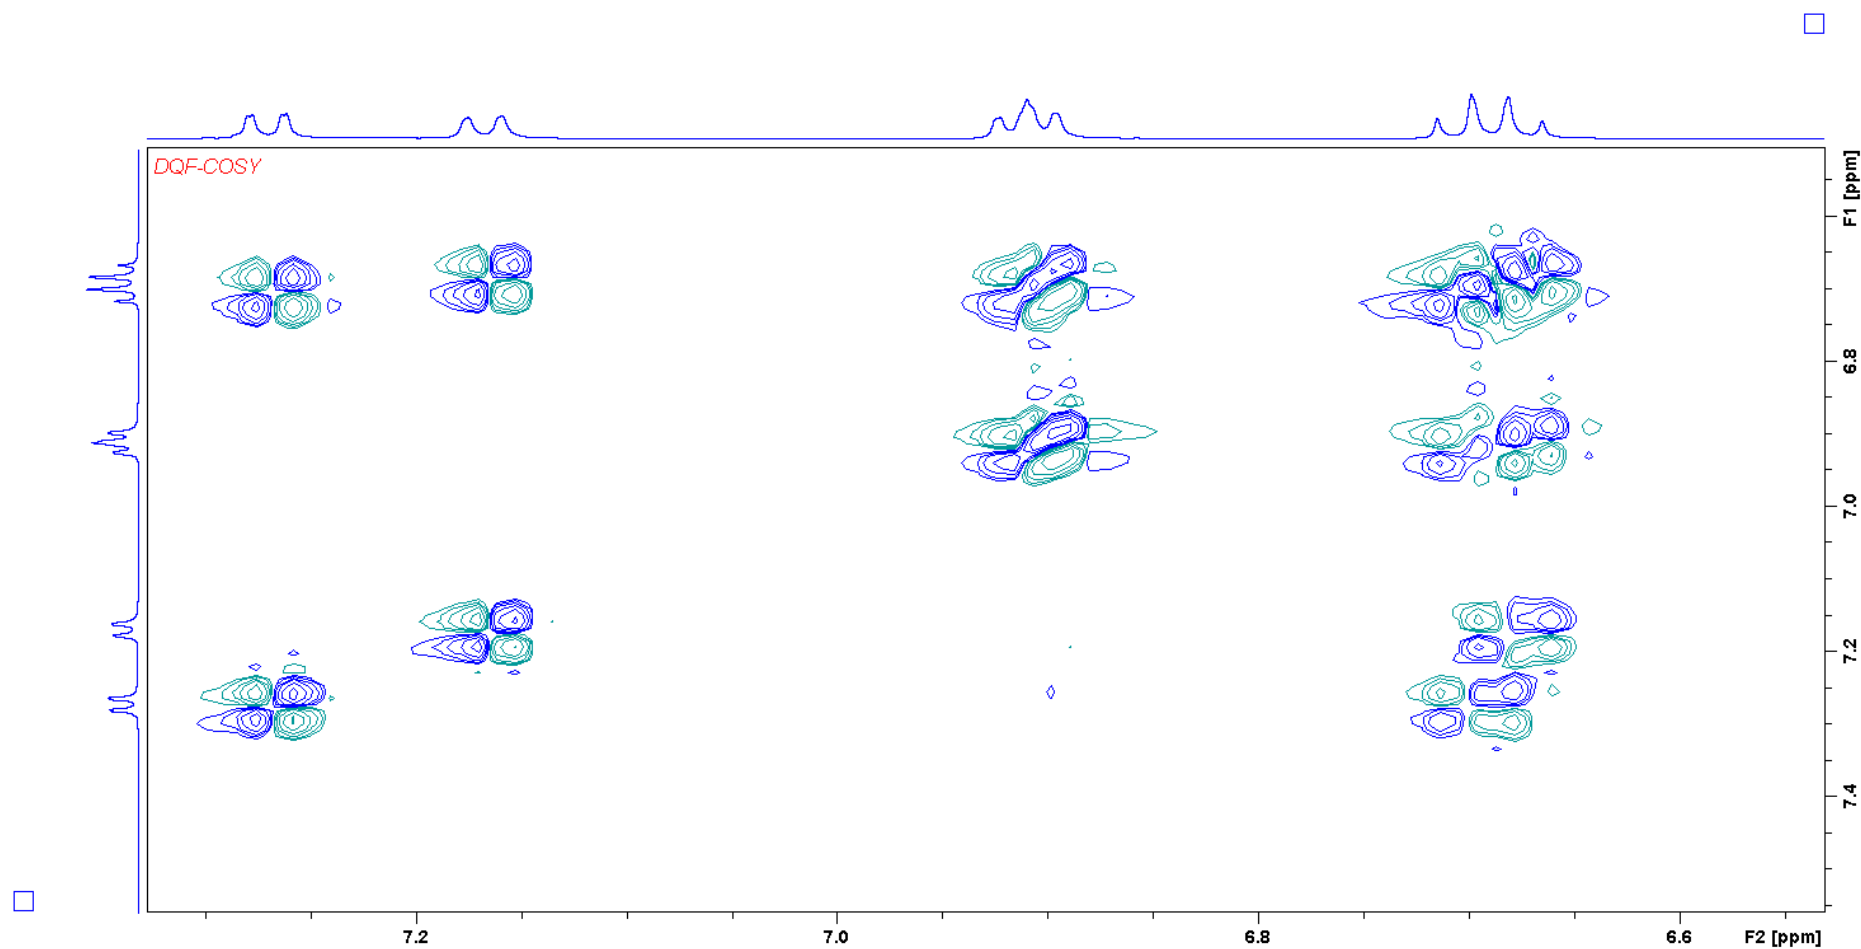

**Figure S52.**  $^1\text{H}$ - $^1\text{H}$  DQF-COSY spectrum of compound **3** (expanded).

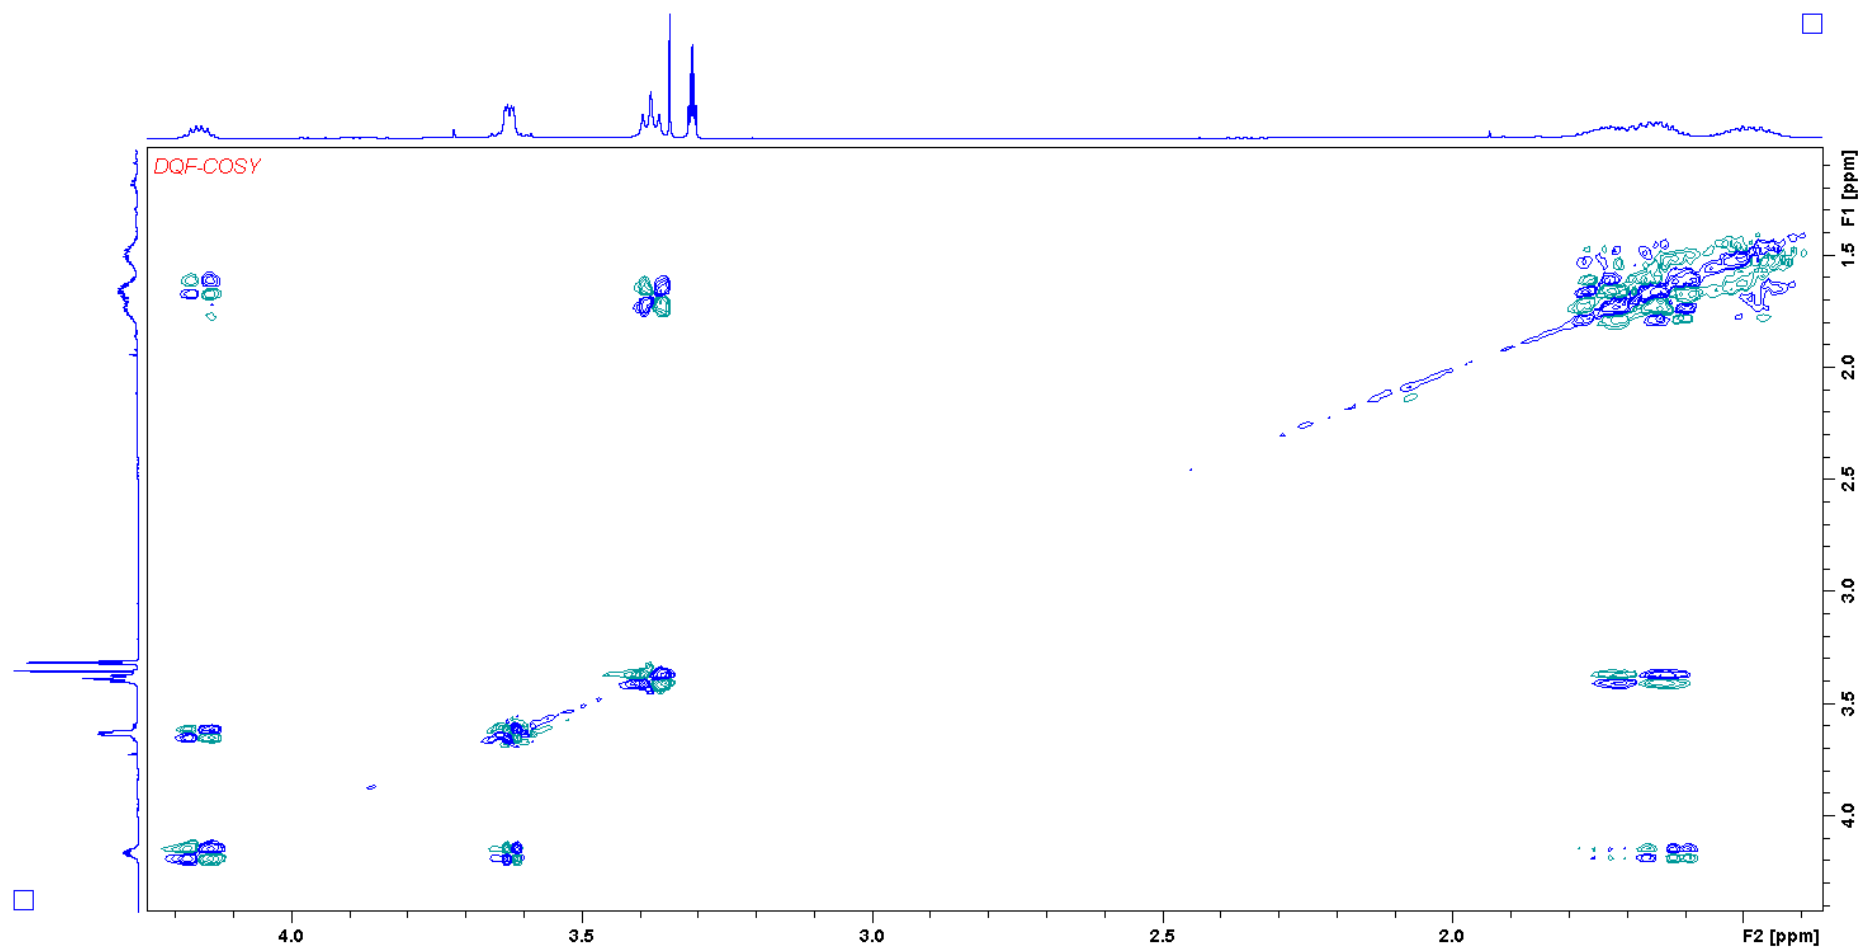

**Figure S53:**  $^1\text{H}$ - $^1\text{H}$  DQF-COSY spectrum of compound **3** (expanded).

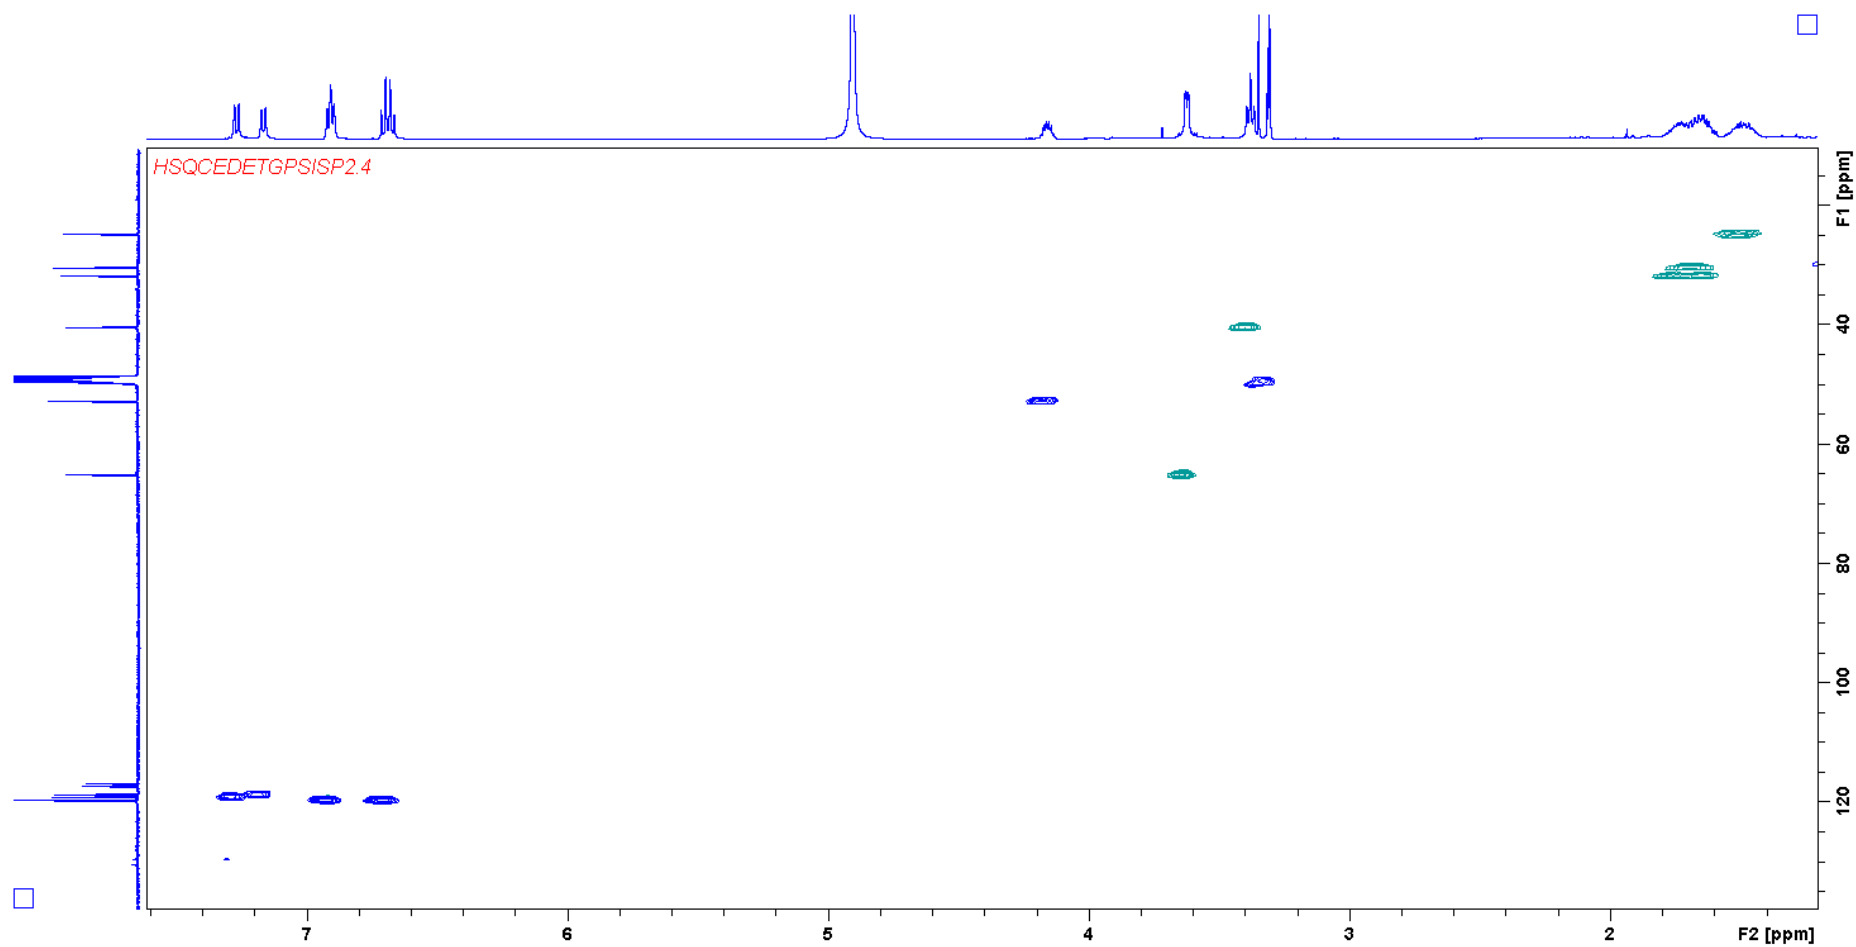

**Figure S54:** HSQC spectrum of compound **3**.

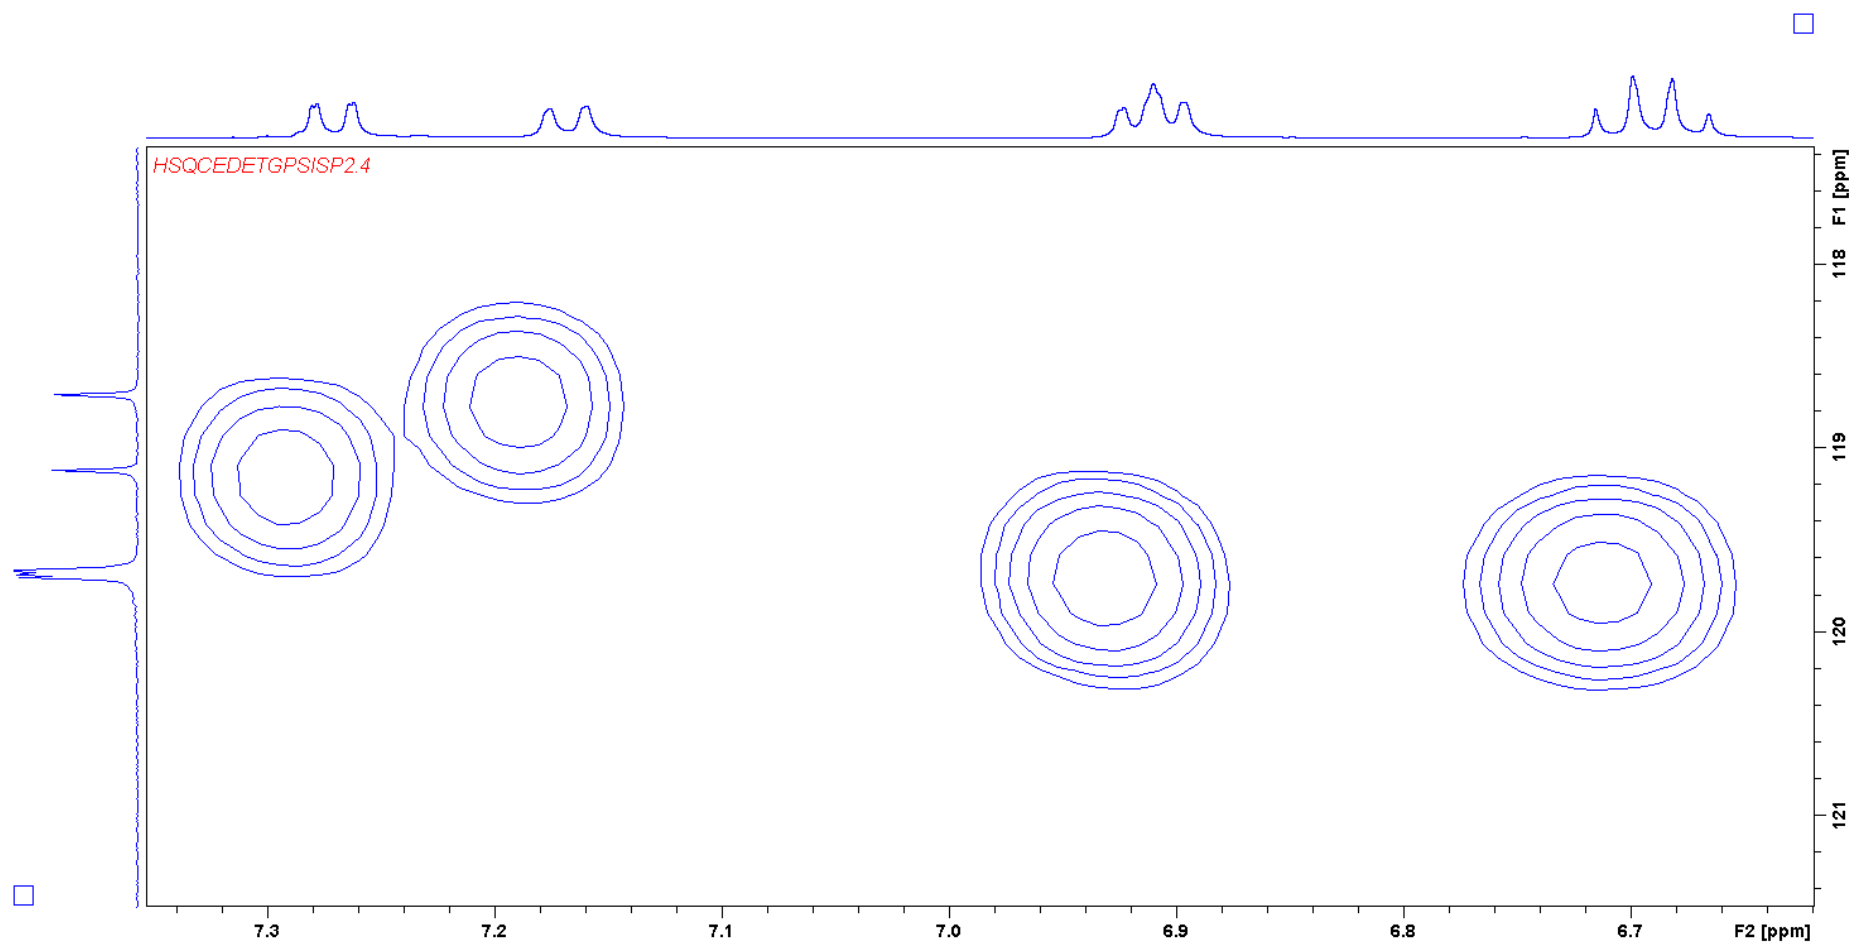

**Figure S55:** HSQC spectrum of compound **3** (expanded).

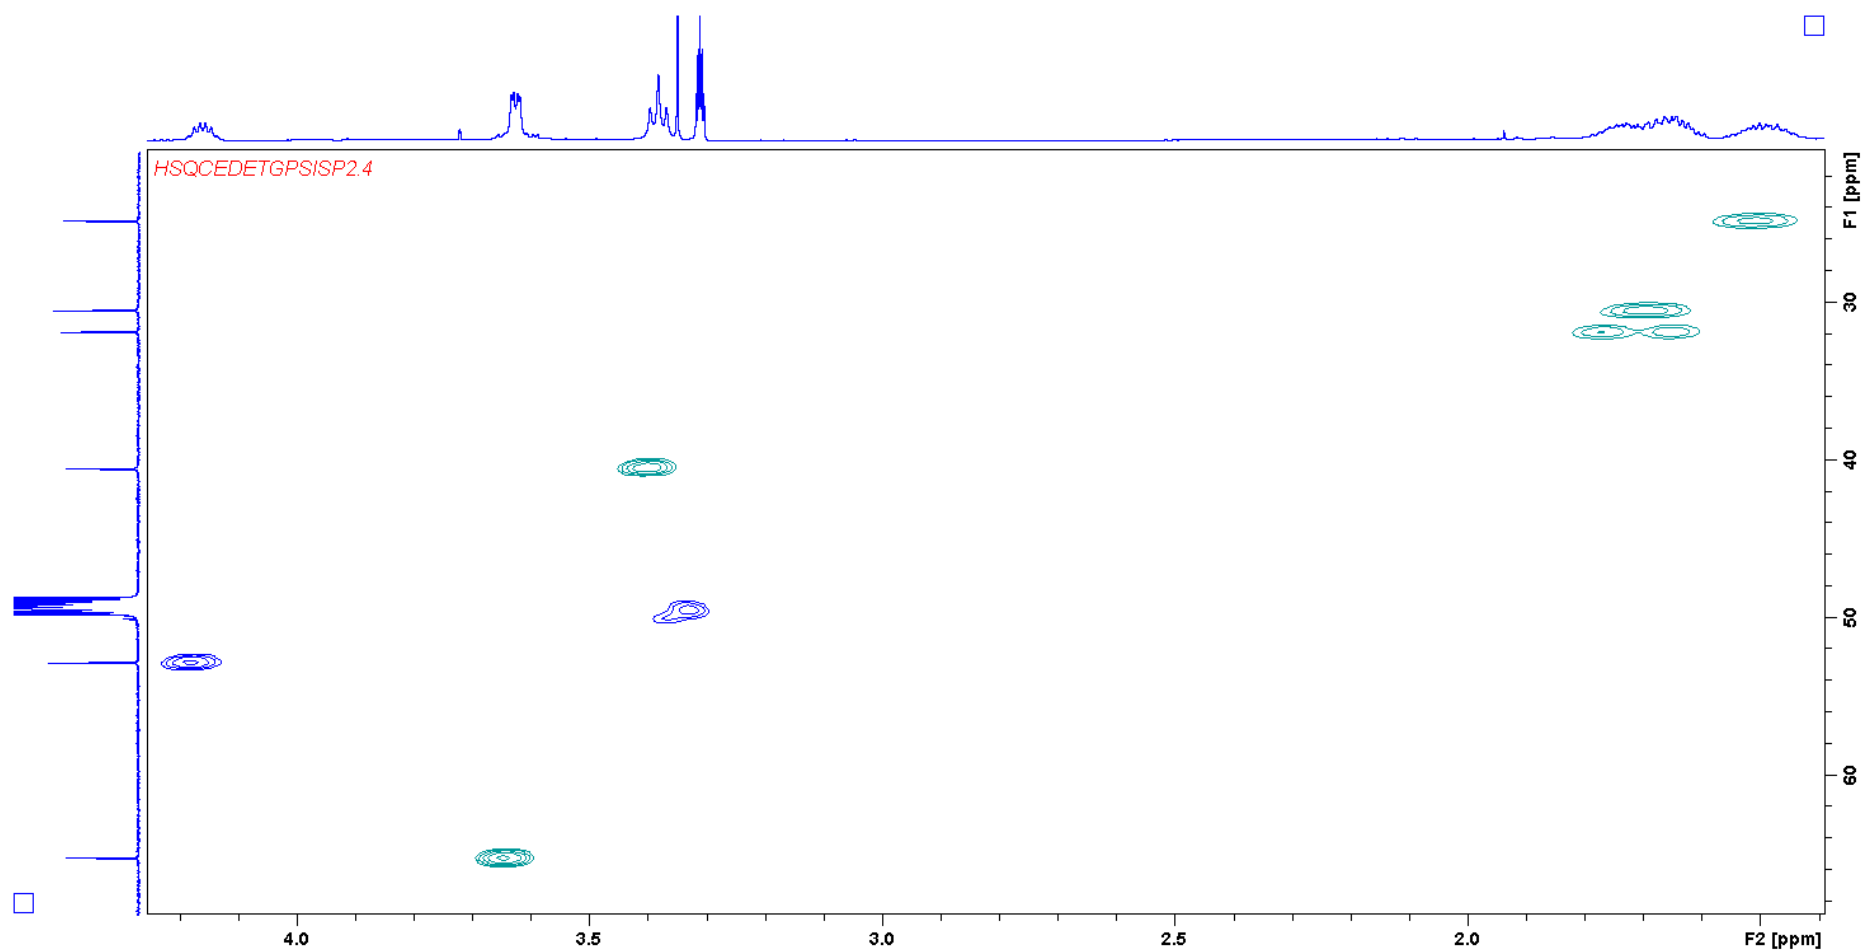

**Figure S56.**  $^1\text{H}$ - $^1\text{H}$  DQF-COSY spectrum of compound **3** (expanded).

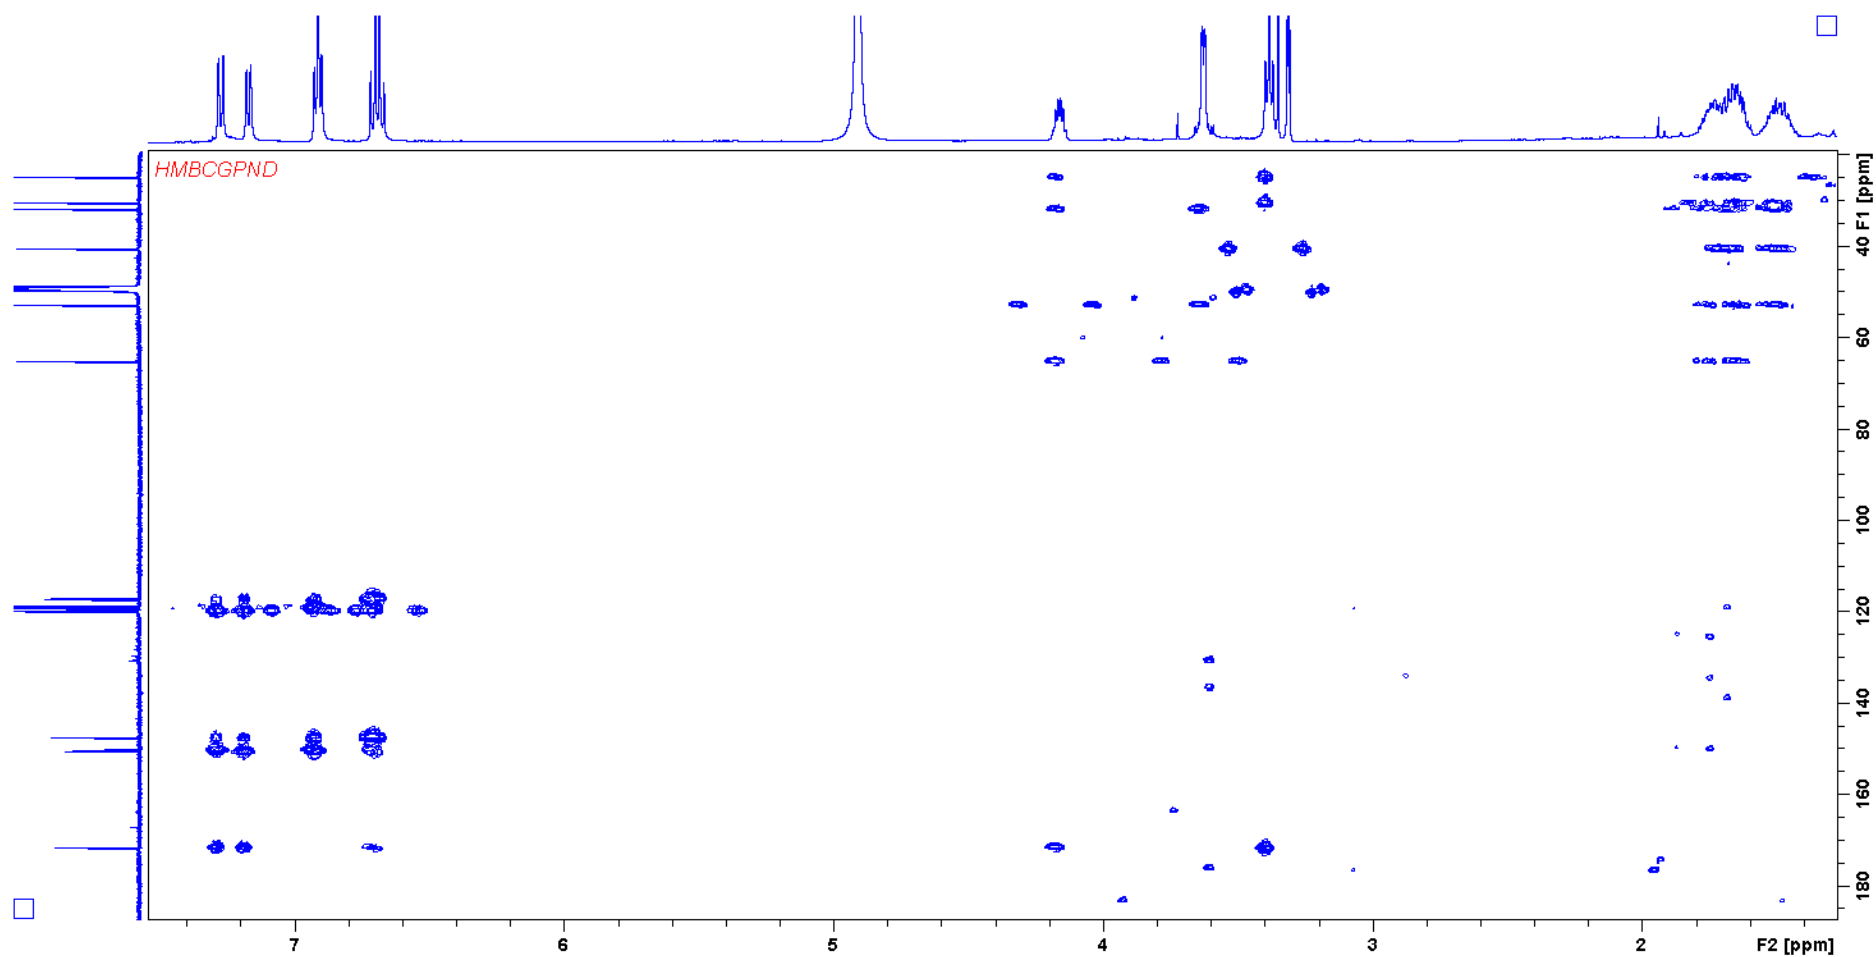

**Figure S57.**  $^1\text{H}$ - $^{13}\text{C}$  HMBC spectrum of compound **3**.

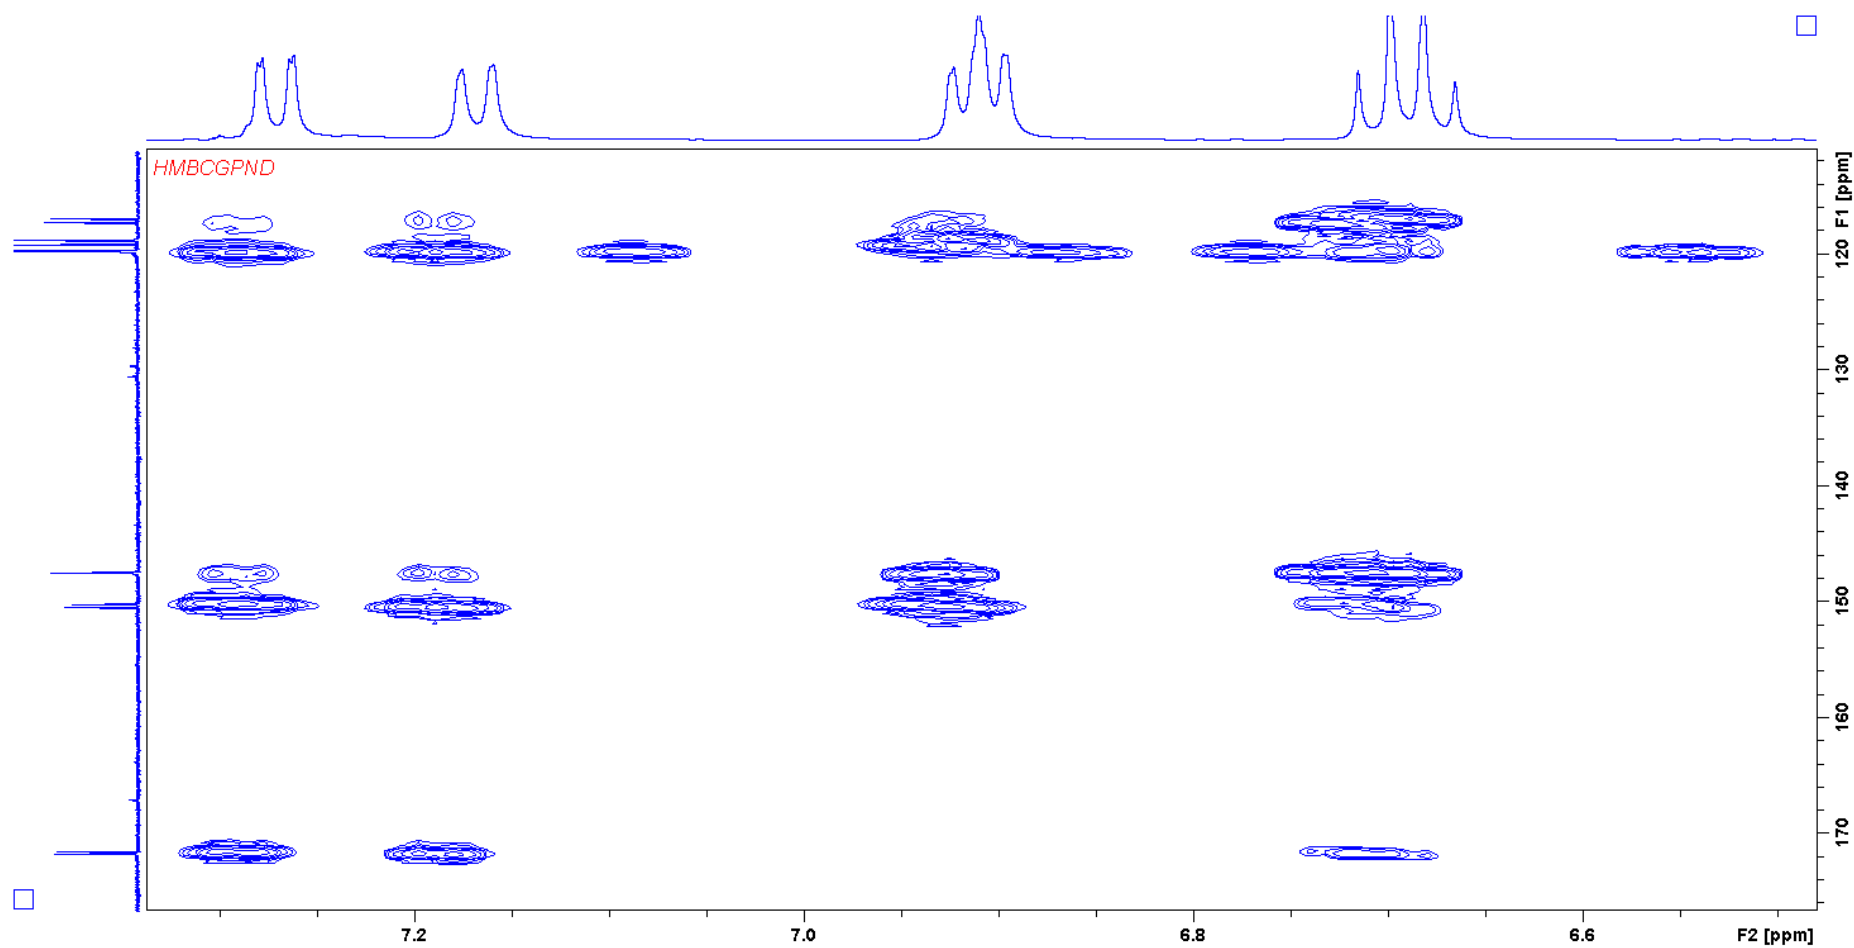

**Figure S58.**  $^1\text{H}$ - $^{13}\text{C}$  HMBC spectrum of compound **3** (expanded).

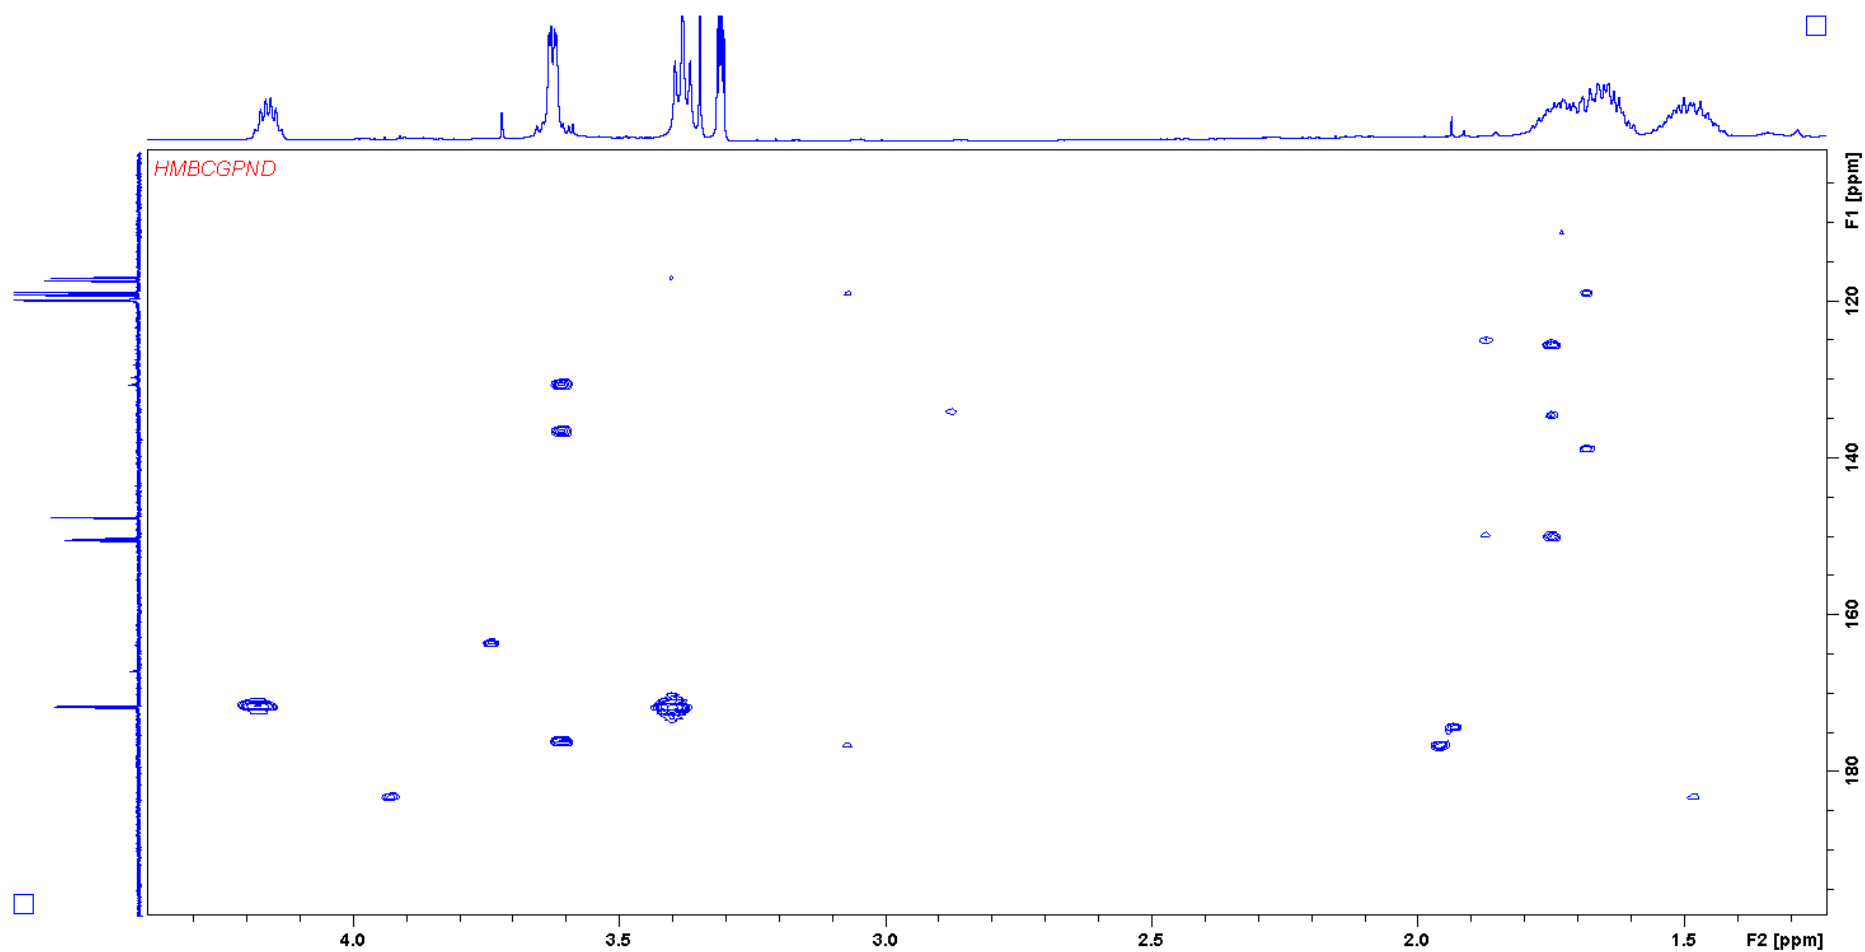

**Figure S59.**  $^1\text{H}$ - $^{13}\text{C}$  HMBC spectrum of compound **3** (expanded).

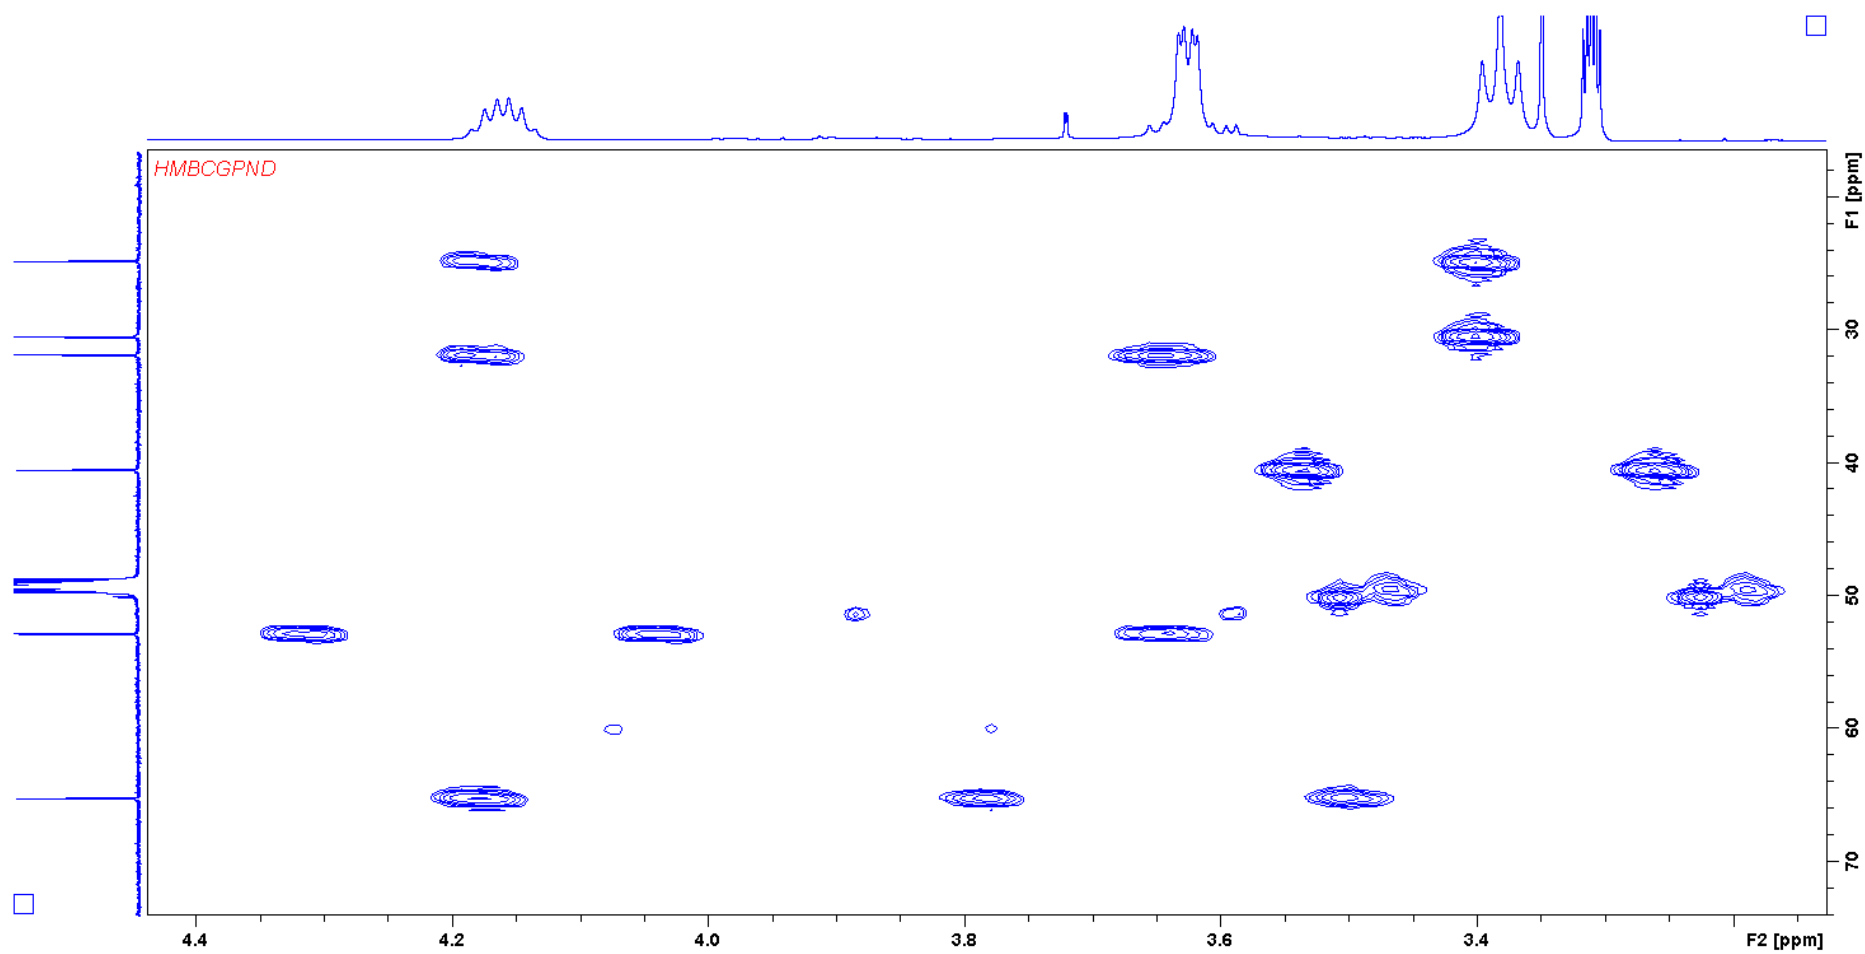

**Figure S60.**  $^1\text{H}$ - $^{13}\text{C}$  HMBC spectrum of compound **3** (expanded).

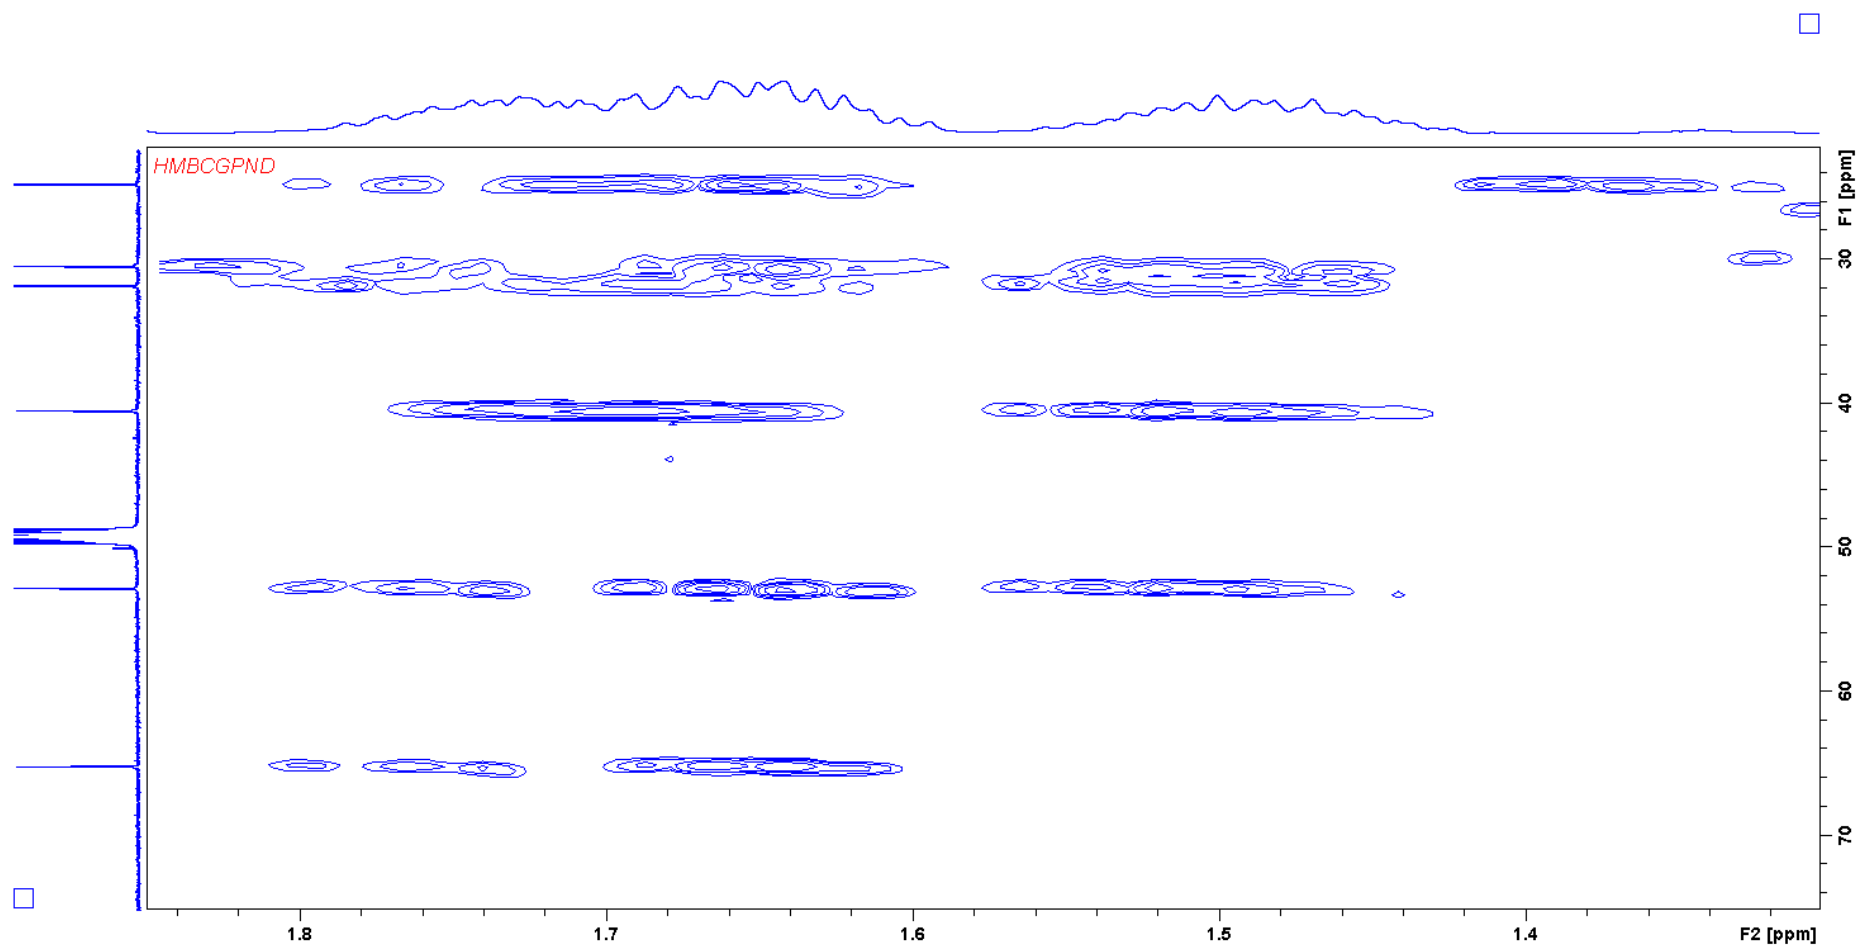

**Figure S61.**  $^1\text{H}$ - $^{13}\text{C}$  HMBC spectrum of compound **3** (expanded).



## 6. References

1. Ambrosi, H.D.; Hartmann, V.; Pistorius, D.; Reissbrodt, R.; Trowitzsch-Kienast, W. Myxochelins B, C, D, E and F: A new structural principle for powerful siderophores imitating nature. *Eur. J. Org. Chem.* **1998**, 541–551.
